# Supplementary material for: Academic stress in college students: descriptive analyses and scoring of the SISCO-II inventory
Source: PeerJ journal article supplement (doi:10.7717/peerj.16980), 2024-03-12
Supplement: Codebook.pdf [file Codebook.pdf]

| Variable                           | Description                                                                                         | Remarks                                                                                                                                                                                                                                                                                                                                                                                                                                                                                                                                                                                                                                                                                                                                                                                                                                                                                        |
|------------------------------------|-----------------------------------------------------------------------------------------------------|------------------------------------------------------------------------------------------------------------------------------------------------------------------------------------------------------------------------------------------------------------------------------------------------------------------------------------------------------------------------------------------------------------------------------------------------------------------------------------------------------------------------------------------------------------------------------------------------------------------------------------------------------------------------------------------------------------------------------------------------------------------------------------------------------------------------------------------------------------------------------------------------|
| .ID                                | Participant ID                                                                                      |                                                                                                                                                                                                                                                                                                                                                                                                                                                                                                                                                                                                                                                                                                                                                                                                                                                                                                |
| -9                                 | Missing values                                                                                      |                                                                                                                                                                                                                                                                                                                                                                                                                                                                                                                                                                                                                                                                                                                                                                                                                                                                                                |
| .Sex                               | Sex: 0=F;1=M                                                                                        |                                                                                                                                                                                                                                                                                                                                                                                                                                                                                                                                                                                                                                                                                                                                                                                                                                                                                                |
| DateBirth                          | Date of birth                                                                                       | dd/mm/yyyy                                                                                                                                                                                                                                                                                                                                                                                                                                                                                                                                                                                                                                                                                                                                                                                                                                                                                     |
| DateAss                            | Date of assessment                                                                                  | dd/mm/yyyy                                                                                                                                                                                                                                                                                                                                                                                                                                                                                                                                                                                                                                                                                                                                                                                                                                                                                     |
| Age                                | Age assessment                                                                                      | years                                                                                                                                                                                                                                                                                                                                                                                                                                                                                                                                                                                                                                                                                                                                                                                                                                                                                          |
| Univ                               | University                                                                                          | 1: UdeC; 2: UDD; 3: UCSC                                                                                                                                                                                                                                                                                                                                                                                                                                                                                                                                                                                                                                                                                                                                                                                                                                                                       |
| Car                                | Career                                                                                              | 1001: UdeC Medical Technology common plan; 1002: UdeC Medical Technology mention in Clinical Bioanalysis, Haematology and Transfusion Medicine; 1003: UdeC Medical Technology mention in Ophthalmology and Optometry; 1004: UdeC Medical Technology mention in Morphophysiology and Cytodiagnosis; 1005: UdeC Medical Technology, mention in Imaging and Medical Physics; 1006: UdeC Obstetrics; 1007: UdeC Kinesiology; 1008: UdeC Speech Therapy; 1009: UdeC Chemistry and Pharmacy; 1010: UdeC Nutrition and Dietetics; 2001: UDD Speech Therapy; 2002: UDD Kinesiology; 2003: UDD Nursing; 2004: UDD Nutrition and Dietetics; 2005: UDD Dentistry; 3001: UCSC Medical Technology mention in Clinical Bioanalysis, Hematology and Transfusion Medicine; 3002: UCSC Medical Technology mention in Ophthalmology and Optometry; 3003: UCSC Medical Technology common plan; 3004: UCSC Nursing |
| Sem                                | Semester assessment                                                                                 |                                                                                                                                                                                                                                                                                                                                                                                                                                                                                                                                                                                                                                                                                                                                                                                                                                                                                                |
| SISCO-II academic stress inventory |                                                                                                     |                                                                                                                                                                                                                                                                                                                                                                                                                                                                                                                                                                                                                                                                                                                                                                                                                                                                                                |
| P1                                 | 1:Yes 0:No                                                                                          |                                                                                                                                                                                                                                                                                                                                                                                                                                                                                                                                                                                                                                                                                                                                                                                                                                                                                                |
| P2                                 | Number                                                                                              |                                                                                                                                                                                                                                                                                                                                                                                                                                                                                                                                                                                                                                                                                                                                                                                                                                                                                                |
| P3_1                               | Overload of homework and academic work                                                              | 1. Never<br>2. Rarely<br>3. Sometimes<br>4. Most of the time<br>5. Always                                                                                                                                                                                                                                                                                                                                                                                                                                                                                                                                                                                                                                                                                                                                                                                                                      |
| P3_2                               | The personality and character of teachers                                                           | 1. Never<br>2. Rarely<br>3. Sometimes<br>4. Most of the time<br>5. Always                                                                                                                                                                                                                                                                                                                                                                                                                                                                                                                                                                                                                                                                                                                                                                                                                      |
| P3_3                               | Teachers' evaluations (exams, essays, research papers, etc.)                                        | 1. Never<br>2. Rarely<br>3. Sometimes<br>4. Most of the time<br>5. Always                                                                                                                                                                                                                                                                                                                                                                                                                                                                                                                                                                                                                                                                                                                                                                                                                      |
| P3_4                               | The type of work teachers ask you to do (map consultation, worksheets, essays, concept maps, etc.). | 1. Never<br>2. Rarely<br>3. Sometimes<br>4. Most of the time<br>5. Always                                                                                                                                                                                                                                                                                                                                                                                                                                                                                                                                                                                                                                                                                                                                                                                                                      |
| P3_5                               | Failure to understand the topics covered in class.                                                  | 1. Never<br>2. Rarely<br>3. Sometimes<br>4. Most of the time<br>5. Always                                                                                                                                                                                                                                                                                                                                                                                                                                                                                                                                                                                                                                                                                                                                                                                                                      |
| P3_6                               | Participation in class (answering questions, presentations, etc.)                                   | 1. Never<br>2. Rarely<br>3. Sometimes<br>4. Most of the time<br>5. Always                                                                                                                                                                                                                                                                                                                                                                                                                                                                                                                                                                                                                                                                                                                                                                                                                      |

|      |                                                                    |                                                                           |
|------|--------------------------------------------------------------------|---------------------------------------------------------------------------|
| P3_7 | Limited time to do the work                                        | 1. Never<br>2. Rarely<br>3. Sometimes<br>4. Most of the time<br>5. Always |
| P3_8 | Group mates make faster progress on homework and/or academic work. | 1. Never<br>2. Rarely<br>3. Sometimes<br>4. Most of the time<br>5. Always |
| P4_1 | Sleep disturbances (insomnia or nightmares)                        | 1. Never<br>2. Rarely<br>3. Sometimes<br>4. Most of the time<br>5. Always |
| P4_2 | Chronic fatigue (permanent tiredness)                              | 1. Never<br>2. Rarely<br>3. Sometimes<br>4. Most of the time<br>5. Always |
| P4_3 | Headaches or migraines                                             | 1. Never<br>2. Rarely<br>3. Sometimes<br>4. Most of the time<br>5. Always |
| P4_4 | Digestion problems, abdominal pain or diarrhoea                    | 1. Never<br>2. Rarely<br>3. Sometimes<br>4. Most of the time<br>5. Always |
| P4_5 | Scratching, nail biting, rubbing, etc.                             | 1. Never<br>2. Rarely<br>3. Sometimes<br>4. Most of the time<br>5. Always |
| P4_6 | Drowsiness or increased need for sleep.                            | 1. Never<br>2. Rarely<br>3. Sometimes<br>4. Most of the time<br>5. Always |
| P4_7 | Muscle aches and/or contractures                                   | 1. Never<br>2. Rarely<br>3. Sometimes<br>4. Most of the time<br>5. Always |
| P4_8 | Skin reactions (rash, peeling, etc.)                               | 1. Never<br>2. Rarely<br>3. Sometimes<br>4. Most of the time<br>5. Always |
| P4_9 | Restlessness (inability to relax and be calm)                      | 1. Never<br>2. Rarely<br>3. Sometimes<br>4. Most of the time<br>5. Always |

|       |                                                              |                                                                           |
|-------|--------------------------------------------------------------|---------------------------------------------------------------------------|
| P4_10 | Anxiety, distress or despair                                 | 1. Never<br>2. Rarely<br>3. Sometimes<br>4. Most of the time<br>5. Always |
| P4_11 | Increased or decreased food intake                           | 1. Never<br>2. Rarely<br>3. Sometimes<br>4. Most of the time<br>5. Always |
| P4_12 | Feelings of depression and sadness (downhearted)             | 1. Never<br>2. Rarely<br>3. Sometimes<br>4. Most of the time<br>5. Always |
| P4_13 | Feelings of aggression or increased irritability             | 1. Never<br>2. Rarely<br>3. Sometimes<br>4. Most of the time<br>5. Always |
| P4_14 | Sudden mood swings                                           | 1. Never<br>2. Rarely<br>3. Sometimes<br>4. Most of the time<br>5. Always |
| P4_15 | Conflict or tendency to argue or quarrel                     | 1. Never<br>2. Rarely<br>3. Sometimes<br>4. Most of the time<br>5. Always |
| P4_16 | Isolation from others                                        | 1. Never<br>2. Rarely<br>3. Sometimes<br>4. Most of the time<br>5. Always |
| P4_17 | Unwillingness to do your work as a student                   | 1. Never<br>2. Rarely<br>3. Sometimes<br>4. Most of the time<br>5. Always |
| P5_1  | Making a plan for the execution of your tasks                | 1. Never<br>2. Rarely<br>3. Sometimes<br>4. Most of the time<br>5. Always |
| P5_2  | Self-praise                                                  | 1. Never<br>2. Rarely<br>3. Sometimes<br>4. Most of the time<br>5. Always |
| P5_3  | Venting and confiding (verbalising the situation of concern) | 1. Never<br>2. Rarely<br>3. Sometimes<br>4. Most of the time<br>5. Always |

|              |                                                                                          |                                                                           |
|--------------|------------------------------------------------------------------------------------------|---------------------------------------------------------------------------|
| P5_4         | I tried to get something positive or beneficial out of the stressful situation.          | 1. Never<br>2. Rarely<br>3. Sometimes<br>4. Most of the time<br>5. Always |
| P5_5         | Taking up a hobby (physical activity, reading, watching series, social networking, etc.) | 1. Never<br>2. Rarely<br>3. Sometimes<br>4. Most of the time<br>5. Always |
| P5_6         | Accompanying a loved one (family, pets, friends, etc.).                                  | 1. Never<br>2. Rarely<br>3. Sometimes<br>4. Most of the time<br>5. Always |
| StSIS        | Total Stressors SISCO-II                                                                 |                                                                           |
| RfsSIS       | Total Physical and Psychological Reactions SISCO-II                                      |                                                                           |
| RcsSIS       | Total social behavioural reactions SISCO-II                                              |                                                                           |
| RxTSIS       | Total Total Reaction Total SISCO-II                                                      |                                                                           |
| Total SIS    | Total Academic Stress Measurement SISCO-II                                               |                                                                           |
| CopSIS       | Total Coping SISCO-II (Factor 4)                                                         |                                                                           |
| TSIS.Af      | Total SISCO-II + coping baseline                                                         |                                                                           |
| General data |                                                                                          |                                                                           |
| TTOPsic      | Are you currently in psychological treatment?                                            | 1:Yes 0:No                                                                |
| TTOfar       | Are you currently on any medication?                                                     | 1:Yes 0:No                                                                |
