# Supplementary material for: Academic stress in college students: descriptive analyses and scoring of the SISCO-II inventory
Source: PeerJ journal article supplement (doi:10.7717/peerj.16980), 2024-03-12
Supplement: Sup_Table.pdf [file Sup_Table.pdf]

|           |    | Stressors   |         |         |
|-----------|----|-------------|---------|---------|
|           |    |             | Score   |         |
|           |    | percentiles | Women   | Men     |
| Low AS    | 0  | 00 - 05     | ≤18     | ≤15     |
|           | 1  | 05 - 10     | 19 - 20 | 16 - 17 |
|           | 2  | 10 - 15     | 21      | 18      |
|           | 3  | 15 - 20     | 22      | 19      |
|           | 4  | 20 - 25     | 23      | 20      |
| Medium AS | 5  | 25 - 30     | -----   | 21      |
|           | 6  | 30 - 35     | 24      | 22      |
|           | 7  | 35 - 40     | 25      | -----   |
|           | 8  | 40 - 45     | -----   | 23      |
|           | 9  | 45 - 50     | 26      | 24      |
|           | 11 | 55 - 60     | 27      | 25      |
|           | 12 | 60 - 65     | 28      | -----   |
|           | 13 | 65 - 70     | -----   | 26      |
| High AS   | 14 | 70 - 75     | 29      | 27      |
|           | 15 | 75 - 80     | 30      | 28      |
|           | 16 | 80 - 85     | 31      | 29      |
|           | 17 | 85 - 90     | 32      | 30      |
|           | 18 | 90 - 95     | 33 - 34 | 31 - 32 |
|           | 19 | 95 - 100    | 35 - 40 | 33 - 40 |

| Physical and Psychological Reactions |    |             |         |         |
|--------------------------------------|----|-------------|---------|---------|
|                                      |    |             | Score   |         |
|                                      |    | percentiles | Women   | Men     |
| Low AS                               | 0  | 00 - 05     | ≤22     | ≤17     |
|                                      | 1  | 05 - 10     | 23 - 25 | 18 - 20 |
|                                      | 2  | 10 - 15     | 26 - 27 | 21 - 22 |
|                                      | 3  | 15 - 20     | 28      | 23      |
|                                      | 4  | 20 - 25     | 29 - 30 | 24 - 25 |
| Medium AS                            | 5  | 25 - 30     | 31      | 26      |
|                                      | 6  | 30 - 35     | 32      | 27      |
|                                      | 7  | 35 - 40     | 33      | 28      |
|                                      | 8  | 40 - 45     | 34      | 29      |
|                                      | 9  | 45 - 50     | 35      | 30      |
|                                      | 10 | 50 - 55     | 36      | 31      |
|                                      | 11 | 55 - 60     | 37      | 32      |
|                                      | 12 | 60 - 65     | 38      | 33      |
|                                      | 13 | 65 - 70     | 39      | 34      |
|                                      | 14 | 70 - 75     | 40      | 35      |
| High AS                              | 15 | 75 - 80     | 41      | 36      |
|                                      | 16 | 80 - 85     | 42 - 43 | 37 - 38 |
|                                      | 17 | 85 - 90     | 44 - 45 | 39 - 40 |
|                                      | 18 | 90 - 95     | 46 - 47 | 41 - 43 |
|                                      | 19 | 95 - 100    | 48 - 55 | 44 - 55 |

| Social Behavioural Reactions |    |             |         |         |
|------------------------------|----|-------------|---------|---------|
|                              |    |             | Score   |         |
|                              |    | percentiles | Women   | Men     |
| Low AS                       | 0  | 00 - 05     | ≤9      | ≤8      |
|                              | 1  | 05 - 10     | 10      | 9       |
|                              | 2  | 10 - 15     | 11      | 10      |
|                              | 3  | 15 - 20     | 12      | 11      |
|                              | 4  | 20 - 25     | -----   | -----   |
| Medium AS                    | 5  | 25 - 30     | 13      | 12      |
|                              | 6  | 30 - 35     | 14      | 13      |
|                              | 8  | 40 - 45     | 15      | 14      |
|                              | 9  | 45 - 50     | 16      | 15      |
|                              | 11 | 55 - 60     | 17      | 16      |
|                              | 12 | 60 - 65     | 18      | 17      |
|                              | 14 | 70 - 75     | 19      | 18      |
| High AS                      | 15 | 75 - 80     | 20      | 19      |
|                              | 16 | 80 - 85     | 21      | 20      |
|                              | 17 | 85 - 90     | 22 - 23 | 21 - 22 |
|                              | 18 | 90 - 95     | 24 - 25 | 23 - 24 |
|                              | 19 | 95 - 100    | 26 - 30 | 25 - 30 |

| Total Reaction |    |             |         |         |
|----------------|----|-------------|---------|---------|
|                |    |             | Score   |         |
|                |    | percentiles | Women   | Men     |
| Low AS         | 0  | 00 - 05     | ≤32     | ≤26     |
|                | 1  | 05 - 10     | 33 - 36 | 27 - 30 |
|                | 2  | 15 - 20     | 37 - 39 | 31 - 33 |
|                | 3  | 15 - 20     | 40 - 42 | 34 - 36 |
|                | 4  | 20 - 25     | 43 - 44 | 37 - 38 |
| Medium AS      | 5  | 25 - 30     | 45      | 39      |
|                | 6  | 30 - 35     | 46 - 47 | 40 - 41 |
|                | 7  | 35 - 40     | 48      | 42      |
|                | 8  | 40 - 45     | 49 - 50 | 43 - 44 |
|                | 9  | 45 - 50     | 51      | 45      |
|                | 10 | 50 - 55     | 52 - 53 | 46 - 47 |
|                | 11 | 55 - 60     | 54      | 48      |
|                | 12 | 60 - 65     | 55 - 56 | 49 - 50 |
|                | 13 | 65 - 70     | 57      | 51      |
|                | 14 | 70 - 75     | 58 - 59 | 52 - 53 |
| High AS        | 15 | 75 - 80     | 60 - 61 | 54 - 55 |
|                | 16 | 80 - 85     | 62 - 63 | 56 - 57 |
|                | 17 | 85 - 90     | 64 - 66 | 58 - 60 |
|                | 18 | 90 - 95     | 67 - 70 | 61 - 64 |
|                | 19 | 95 - 100    | 71 - 85 | 65 - 85 |

| Coping Strategies |    |             |         |         |
|-------------------|----|-------------|---------|---------|
|                   |    |             | Score   |         |
|                   |    | percentiles | Women   | Men     |
| Low AS            | 0  | 00 - 05     | ≤12     | ≤12     |
|                   | 1  | 05 - 10     | 13      | 13      |
|                   | 2  | 10 - 15     | 14      | 14      |
|                   | 3  | 15 - 20     | 15      | 15      |
|                   | 4  | 20 - 25     | 16      | 16      |
| Medium AS         | 5  | 25 - 30     | -----   | -----   |
|                   | 6  | 30 - 35     | 17      | 17      |
|                   | 7  | 35 - 40     | -----   | -----   |
|                   | 8  | 40 - 45     | 18      | 18      |
|                   | 9  | 45 - 50     | -----   | -----   |
|                   | 10 | 50 - 55     | 19      | 19      |
|                   | 11 | 55 - 60     | -----   | -----   |
|                   | 12 | 60 - 65     | 20      | 20      |
|                   | 13 | 65 - 70     | -----   | -----   |
|                   | 14 | 70 - 75     | 21      | 21      |
| High AS           | 15 | 75 - 80     | 22      | 22      |
|                   | 17 | 85 - 90     | 23      | 23      |
|                   | 18 | 90 - 95     | 24 - 25 | 24 - 25 |
|                   | 19 | 95 - 100    | 26 - 30 | 26 - 30 |

|           |    | Full instrument |           |           |
|-----------|----|-----------------|-----------|-----------|
|           |    |                 | Score     |           |
|           |    | percentiles     | Women     | Men       |
| Low AS    | 0  | 00 - 05         | ≤72       | ≤63       |
|           | 1  | 05 - 10         | 73 - 77   | 64 - 69   |
|           | 2  | 10 - 15         | 78 - 81   | 70 - 72   |
|           | 3  | 15 - 20         | 82 - 84   | 73 - 75   |
|           | 4  | 20 - 25         | 85 - 86   | 76 - 78   |
| Medium AS | 5  | 25 - 30         | 87 - 89   | 79 - 80   |
|           | 6  | 30 - 35         | 90 - 91   | 81 - 82   |
|           | 7  | 35 - 40         | 92 - 93   | 83 - 84   |
|           | 8  | 40 - 45         | 94 - 95   | 85 - 86   |
|           | 9  | 45 - 50         | 96 - 97   | 87 - 88   |
|           | 10 | 50 - 55         | 98 - 99   | 89 - 90   |
|           | 11 | 55 - 60         | 100       | 91 - 92   |
|           | 12 | 60 - 65         | 101 - 102 | 93 - 94   |
|           | 13 | 65 - 70         | 103 - 105 | 95 - 96   |
|           | 14 | 70 - 75         | 106 - 107 | 97 - 98   |
| High AS   | 15 | 75 - 80         | 108 - 109 | 99 - 101  |
|           | 16 | 80 - 85         | 110 - 112 | 102 - 104 |
|           | 17 | 85 - 90         | 113 - 116 | 105 - 107 |
|           | 18 | 90 - 95         | 117 - 121 | 108 - 113 |
|           | 19 | 95 - 100        | 122 - 139 | 114 - 139 |
