# Supplementary material for: Academic stress in college students: descriptive analyses and scoring of the SISCO-II inventory
Source: PeerJ. 2024 Mar 12;12:e16980. doi: 10.7717/peerj.16980 (PMC10941763; doi:10.7717/peerj.16980)
Supplement: Supplemental Information 3 [file peerj-12-16980-s003.xlsx]

## Sheet: Base
.ID	Sex	DateBirrth	DateAss	Age	Car	Univ	Sem	TTOPsic	TTOfar	P1	P2	P3_1	P3_2	P3_3	P3_4	P3_5	P3_6	P3_7	P3_8	StSIS	P4_1	P4_2	P4_3	P4_4	P4_5	P4_6	P4_7	P4_8	P4_9	P4_10	P4_11	RfsSIS	P4_12	P4_13	P4_14	P4_15	P4_16	P4_17	RcsSIS	RxTSIS	P5_1	P5_2	P5_3	P5_4	P5_5	P5_6	CopSIS	Total SIS
1	0	1998-05-07	2017-06-02	19.0719	1001	1	3	0	0	1	3	4	2	4	3	3	3	3	2	24	3	4	3	3	4	4	2	1	4	4	4	36	4	3	3	2	2	4	18	54	2	2	2	2	3	3	14	92
2	0	1997-10-26	2017-06-02	19.6003	1001	1	3	0	0	1	5	4	3	5	4	4	3	5	3	31	3	3	3	3	5	3	3	2	4	4	3	36	4	3	2	2	3	3	17	53	4	2	3	3	5	5	22	106
4	0	1997-04-22	2017-06-02	20.1123	1001	1	3	0	0	1	5	3	4	5	5	5	5	3	5	35	3	3	4	2	3	4	4	3	4	3	5	38	3	5	4	2	4	5	23	61	2	2	3	4	3	2	16	112
5	0	1998-03-25	2017-06-02	19.1896	1001	1	3	0	0	1	4	4	1	2	3	2	3	4	3	22	3	5	3	2	3	3	3	2	3	3	1	31	3	3	3	3	2	4	18	49	2	2	3	3	2	4	16	87
6	0	1997-08-20	2017-06-02	19.7837	1001	1	3	1	0	1	4	4	3	5	3	4	2	3	5	29	3	2	4	1	5	5	2	2	5	4	3	36	5	2	3	2	2	3	17	53	4	1	2	1	2	4	14	96
7	0	1997-03-11	2017-06-02	20.2272	1001	1	3	0	0	1	3	4	2	4	2	3	3	2	3	23	3	3	2	3	4	4	4	3	3	3	4	36	4	4	3	3	2	4	20	56	4	3	3	3	4	4	21	100
9	0	1997-07-18	2017-06-02	19.8741	1001	1	3	0	0	1	5	5	3	5	3	5	4	5	5	35	5	5	5	5	5	5	5	5	4	4	3	51	5	3	4	4	2	3	21	72	3	1	2	2	5	4	17	124
11	0	1996-08-20	2017-06-02	20.783	1001	1	3	1	0	1	5	5	4	5	4	5	2	4	3	32	2	5	3	4	5	5	4	3	4	5	4	44	4	4	4	4	3	4	23	67	2	3	5	4	3	3	20	119
12	0	1997-10-10	2017-06-02	19.6441	1001	1	3	0	0	1	5	5	2	5	3	5	2	5	5	32	3	3	5	5	2	5	3	3	5	5	5	44	5	2	1	2	2	4	16	60	5	1	5	4	2	5	22	114
13	0	1997-08-26	2017-06-02	19.7673	1001	1	3	0	0	1	4	4	2	3	2	4	5	3	5	28	4	5	5	5	5	2	3	5	4	4	3	45	5	2	2	3	5	3	20	65	2	1	2	5	5	4	19	112
14	0	1997-07-14	2017-06-02	19.885	1001	1	3	0	0	1	4	3	1	4	3	4	2	3	1	21	3	1	1	3	4	1	1	1	3	3	3	24	3	4	2	2	4	4	19	43	4	4	1	4	4	4	21	85
15	0	1997-05-21	2017-06-02	20.0329	1001	1	3	0	0	1	5	5	3	5	5	3	2	5	5	33	4	5	5	3	4	5	4	4	4	5	5	48	5	3	3	3	5	5	24	72	3	4	2	4	2	2	17	122
18	0	1996-10-04	2017-06-02	20.6598	1001	1	3	0	0	1	5	5	5	5	4	5	4	5	5	38	2	4	4	5	5	5	2	2	5	5	5	44	5	1	5	1	1	4	17	61	1	1	2	2	2	5	13	112
19	0	1997-12-25	2017-06-02	19.436	1001	1	3	0	0	1	4	3	2	4	4	3	2	3	3	24	3	4	2	3	3	4	2	1	3	3	3	31	3	2	1	1	3	4	14	45	3	2	2	2	3	3	15	84
20	0	1998-03-28	2017-06-02	19.1814	1001	1	3	0	0	1	4	4	2	5	5	4	2	5	4	31	4	4	1	2	5	5	3	5	4	5	5	43	5	5	2	3	2	4	21	64	5	2	1	1	1	1	11	106
21	0	1998-04-02	2017-06-02	19.1677	1001	1	3	0	0	1	5	4	2	5	3	4	3	4	4	29	3	4	3	2	4	5	1	1	3	2	4	32	4	3	4	2	2	3	18	50	3	1	2	3	4	5	18	97
22	0	1997-02-25	2017-06-02	20.2656	1001	1	3	0	0	1	2	3	2	3	3	3	2	2	2	20	3	3	3	2	1	3	2	1	2	3	3	26	2	2	3	2	2	3	14	40	4	2	4	3	3	4	20	80
24	0	1997-12-14	2017-06-02	19.4661	1001	1	3	0	0	1	3	4	3	4	3	2	4	3	3	26	4	3	3	2	3	2	2	1	3	3	3	29	3	1	1	1	3	3	12	41	3	3	1	2	2	3	14	81
25	0	1997-11-19	2017-06-02	19.5346	1001	1	3	0	0	1	4	5	2	5	3	4	1	3	3	26	1	4	5	1	4	5	2	1	5	3	5	36	5	2	1	2	2	1	13	49	5	2	2	3	3	4	19	94
26	0	1998-01-05	2017-06-02	19.4059	1001	1	3	0	0	1	4	4	3	5	5	4	2	5	4	32	4	5	3	3	5	5	3	2	3	3	4	40	3	3	2	2	2	4	16	56	4	2	3	3	3	4	19	107
28	0	1997-07-02	2017-06-02	19.9179	1001	1	3	0	0	1	5	4	3	5	3	3	4	5	4	31	3	2	2	2	2	3	4	2	5	4	3	32	4	3	4	2	3	3	19	51	4	2	3	3	3	5	20	102
31	0	1994-09-05	2017-06-02	22.7406	1001	1	3	0	0	1	4	4	3	3	3	3	2	4	3	25	3	4	4	4	4	4	3	3	4	4	2	39	3	3	3	3	2	3	17	56	3	2	3	3	3	4	18	99
32	0	1997-12-03	2017-06-02	19.4962	1001	1	3	0	0	1	-9	4	2	4	2	4	2	2	4	24	4	4	4	3	5	4	4	3	2	4	2	39	3	4	3	4	3	3	20	59	4	5	1	4	5	4	23	106
33	0	1997-01-11	2017-06-02	20.3888	1001	1	3	0	0	1	2	4	3	3	2	2	2	3	2	21	3	3	3	3	5	3	3	1	3	3	4	34	2	3	3	2	2	2	14	48	4	4	4	4	4	4	24	93
35	0	1998-01-19	2017-06-02	19.3676	1001	1	3	0	0	1	4	3	3	4	3	4	3	4	2	26	2	4	4	2	1	5	3	1	2	3	4	31	2	2	1	1	1	3	10	41	3	2	2	1	5	4	17	84
37	0	1997-12-06	2017-06-02	19.488	1001	1	3	0	0	1	4	4	2	4	3	3	1	3	1	21	2	5	4	3	5	5	3	2	4	4	4	41	4	3	5	3	4	4	23	64	4	1	1	2	3	5	16	101
38	0	1997-10-24	2017-06-02	19.6057	1001	1	3	0	0	1	5	4	3	5	5	3	5	3	3	31	3	5	4	3	4	4	5	3	3	4	4	42	4	5	3	3	3	4	22	64	4	4	5	5	3	5	26	121
40	0	1997-07-24	2017-06-02	19.8576	1001	1	3	0	0	1	5	2	1	5	1	3	2	3	5	22	3	4	1	1	3	4	1	1	4	4	4	30	4	4	4	4	4	4	24	54	1	1	3	3	1	4	13	89
41	0	1997-06-16	2017-06-02	19.9617	1001	1	3	0	0	1	5	4	3	5	3	4	3	3	3	28	3	4	3	3	2	4	3	1	4	4	2	33	4	2	2	1	2	3	14	47	4	3	2	5	3	2	19	94
42	0	1998-04-01	2017-06-02	19.1704	1001	1	3	0	0	1	4	4	4	4	4	3	5	5	3	32	3	2	3	3	2	4	3	1	2	3	3	29	2	2	3	1	2	3	13	42	4	2	1	4	4	3	18	92
44	0	1997-11-10	2017-06-02	19.5592	1001	1	3	0	0	1	3	4	3	5	4	3	2	5	2	28	3	3	1	1	1	4	1	1	2	1	5	23	2	3	3	2	4	4	18	41	4	1	2	3	3	4	17	86
45	0	1996-12-02	2017-06-05	20.5065	1002	1	5	0	0	1	5	4	4	4	4	3	4	4	3	30	3	3	4	3	1	4	3	1	5	3	4	34	4	2	2	2	1	3	14	48	3	1	3	3	2	3	15	93
46	0	1997-01-22	2017-06-05	20.3669	1002	1	5	0	0	1	5	4	2	5	3	1	1	3	1	20	3	5	3	4	2	3	4	1	5	5	3	38	5	5	5	4	3	2	24	62	5	3	3	3	2	5	21	103
47	0	1996-06-08	2017-06-05	20.9911	1002	1	5	0	0	1	4	4	2	4	3	4	3	3	4	27	3	3	3	3	1	3	2	1	3	2	3	27	4	2	3	3	3	4	19	46	4	2	3	2	4	5	20	93
48	0	1996-02-21	2017-06-05	21.2868	1002	1	5	0	0	1	4	5	3	4	3	3	3	4	5	30	3	4	2	2	3	5	2	5	4	5	4	39	3	1	2	2	3	4	15	54	4	2	5	4	4	5	24	108
52	0	1995-07-06	2017-06-05	21.9165	1002	1	5	0	0	1	4	5	4	5	4	5	4	5	3	35	2	3	4	2	5	5	3	2	3	2	2	33	2	2	2	2	2	3	13	46	4	2	4	2	3	5	20	101
53	0	1994-12-17	2017-06-05	22.4668	1002	1	5	0	0	1	4	4	3	4	4	3	3	4	2	27	3	4	2	1	1	4	4	1	4	3	2	29	2	2	3	2	1	3	13	42	4	1	4	4	4	4	21	90
54	0	1997-01-27	2017-06-05	20.3532	1002	1	5	0	0	4	4	3	4	5	3	4	2	4	3	28	5	5	4	4	4	5	3	3	4	4	5	46	4	5	5	4	2	4	24	70	4	4	4	4	5	5	26	124
56	0	1997-04-11	2017-06-05	20.1506	1002	1	5	0	0	1	3	3	3	4	3	1	2	3	2	21	1	2	1	1	3	2	2	1	1	2	2	18	1	2	2	1	1	3	10	28	3	5	2	3	3	4	20	69
57	0	1993-09-01	2017-06-05	23.7591	1002	1	5	0	0	1	3	3	3	3	3	2	2	3	2	21	2	3	3	3	2	4	4	2	2	3	3	31	2	3	2	2	2	3	14	45	3	2	3	3	5	4	20	86
58	0	1996-04-15	2017-06-05	21.1389	1002	1	5	0	0	1	4	5	3	4	4	4	5	5	4	34	1	2	3	3	1	4	3	1	3	3	4	28	2	3	2	2	2	3	14	42	2	2	1	1	4	3	13	89
60	0	1994-02-07	2017-06-05	23.3238	1002	1	5	0	0	1	4	5	3	4	3	3	3	5	5	31	3	4	4	4	3	4	1	5	5	4	4	41	3	2	3	2	3	3	16	57	4	3	3	2	5	3	20	108
66	0	1995-10-28	2017-06-08	21.6126	1003	1	5	0	0	1	5	3	2	3	3	4	3	3	2	23	5	5	5	2	2	5	1	3	4	3	5	40	4	1	2	2	4	5	18	58	4	1	2	4	5	2	18	99
68	0	1997-05-10	2017-06-08	20.0794	1003	1	5	0	0	1	3	3	3	4	3	2	2	3	3	23	3	3	3	3	1	4	4	3	2	2	1	29	3	4	3	2	3	3	18	47	4	3	2	3	2	3	17	87
69	0	1997-01-26	2017-06-08	20.3641	1003	1	5	0	0	1	3	3	2	3	2	3	2	2	1	18	3	4	2	2	2	4	3	1	3	2	2	28	1	3	3	2	2	2	13	41	4	5	4	4	3	5	25	84
70	0	1996-12-13	2017-06-08	20.4846	1003	1	5	0	0	1	5	5	3	5	3	5	3	3	3	30	3	5	1	3	1	5	4	1	3	3	5	34	3	4	2	1	1	2	13	47	5	2	4	5	5	5	26	103
71	0	1997-01-20	2017-06-08	20.3806	1003	1	5	0	0	1	4	4	3	5	3	3	2	3	3	26	4	3	3	4	5	2	3	3	4	4	4	39	3	2	3	3	2	3	16	55	3	3	3	4	4	4	21	102
72	0	1996-11-11	2017-06-08	20.5722	1003	1	5	0	0	1	4	3	3	4	3	4	4	4	2	27	5	5	5	4	3	5	5	1	3	3	3	42	3	3	3	1	3	3	16	58	1	2	1	3	1	3	11	96
73	0	1995-08-27	2017-06-08	21.7823	1003	1	5	0	0	1	4	3	3	4	2	3	5	4	2	26	3	2	4	4	4	3	2	2	5	5	4	38	3	2	3	3	1	2	14	52	3	1	5	4	2	5	20	98
74	0	1996-12-28	2017-06-08	20.4435	1003	1	5	0	0	1	5	4	4	5	4	3	3	5	3	31	3	4	2	3	5	4	3	2	4	3	2	35	4	3	3	4	2	4	20	55	3	3	4	3	2	3	18	104
76	0	1996-06-11	2017-06-12	21.0021	1004	1	5	0	0	1	-9	5	3	5	4	3	2	4	3	29	4	4	4	4	4	4	5	1	5	4	4	43	2	4	4	4	3	3	20	63	3	3	3	3	4	4	20	112
77	0	1996-10-19	2017-06-12	20.6461	1004	1	5	0	0	1	4	4	3	4	3	3	3	4	3	27	4	4	3	3	4	4	3	5	3	3	4	40	3	3	4	3	3	4	20	60	5	2	4	4	4	5	24	111
78	0	1997-05-27	2017-06-12	20.0438	1004	1	5	0	0	1	4	4	2	3	4	3	2	4	2	24	3	4	4	3	4	4	4	3	3	3	3	38	2	3	2	3	2	3	15	53	3	2	1	2	4	4	16	93
80	0	1996-10-14	2017-06-06	20.6434	1004	1	5	0	0	1	4	4	1	4	4	3	2	5	2	25	2	3	2	2	1	4	4	1	3	3	5	30	3	2	4	2	3	4	18	48	4	3	-9	4	3	3	8	81
81	0	1997-06-14	2017-06-06	19.9781	1004	1	5	0	0	1	5	4	2	5	3	5	3	5	3	30	4	5	2	5	4	5	1	3	4	5	4	42	4	5	3	3	2	4	21	63	2	1	4	4	3	5	19	112
83	0	1996-11-28	2017-06-06	20.5202	1004	1	5	0	0	1	3	2	3	3	3	3	3	3	3	23	3	4	3	3	3	5	1	2	3	3	5	35	2	4	3	2	1	3	15	50	3	3	2	4	4	4	20	93
84	0	1995-10-11	2017-06-06	21.6537	1004	1	5	0	0	1	4	3	1	5	5	3	4	5	3	29	5	3	4	2	5	1	2	1	3	3	3	32	1	1	1	1	2	3	9	41	4	3	2	4	5	5	23	93
86	0	1997-01-20	2017-06-12	20.3915	1004	1	5	1	1	1	5	5	1	3	2	1	1	2	2	17	4	4	5	1	5	5	1	3	4	4	4	40	3	3	2	3	3	4	18	58	3	3	2	3	4	3	18	93
87	0	1996-10-08	2017-06-12	20.6762	1004	1	5	0	0	1	5	5	1	5	4	2	5	-9	1	14	4	5	5	2	3	4	3	5	3	4	5	43	2	5	2	3	2	5	19	62	5	1	3	2	5	5	21	97
88	0	1997-03-06	2017-06-12	20.2683	1004	1	5	0	0	1	5	5	3	5	4	3	3	4	2	29	3	3	3	2	4	4	1	1	4	3	4	32	2	3	4	1	1	3	14	46	4	3	4	5	4	3	23	98
90	0	1996-09-23	2017-06-27	20.7584	1005	1	5	0	0	1	5	4	4	5	5	3	3	5	2	31	2	2	4	4	4	5	4	4	5	4	4	42	3	3	4	3	3	3	19	61	5	5	2	4	5	4	25	117
91	0	1996-06-25	2017-06-27	21.0048	1005	1	5	0	0	1	4	5	3	4	4	3	4	4	5	32	1	1	1	1	4	3	3	2	3	3	4	26	3	3	2	1	2	3	14	40	2	2	2	2	5	4	17	89
93	0	1993-11-25	2017-06-27	23.5866	1005	1	5	0	0	1	5	4	5	5	4	5	3	5	2	33	3	5	2	2	4	5	4	1	5	1	4	36	2	3	3	4	3	2	17	53	2	4	2	5	4	5	22	108
94	0	1996-01-11	2017-06-27	21.4593	1005	1	5	0	0	1	4	3	5	4	3	3	1	3	2	24	2	4	3	3	3	4	3	1	3	4	3	33	4	3	3	2	2	3	17	50	4	3	3	3	4	4	21	95
96	0	1996-01-12	2017-06-27	21.4565	1005	1	5	0	0	1	5	4	3	5	4	3	3	4	3	29	1	4	4	1	2	4	2	1	3	3	4	29	4	2	3	2	2	3	16	45	3	3	2	4	3	5	20	94
97	0	1996-04-24	2017-06-27	21.1745	1005	1	5	0	0	1	5	4	3	5	4	3	3	4	3	29	3	3	3	4	2	3	2	1	4	4	4	33	3	3	3	2	2	3	16	49	5	3	4	3	4	5	24	102
98	0	1996-10-21	2017-06-27	20.6817	1005	1	5	0	0	1	4	5	4	5	4	2	2	4	4	30	1	4	2	4	2	5	3	2	4	4	3	34	4	4	4	3	2	3	20	54	2	2	2	3	5	1	15	99
99	0	1996-11-18	2017-06-27	20.6051	1005	1	5	0	0	1	4	3	3	3	3	3	1	2	1	19	3	3	1	1	1	4	1	1	3	2	3	23	1	3	3	2	1	3	13	36	4	3	4	5	5	5	26	81
103	0	1995-12-27	2017-06-27	21.5003	1005	1	5	0	0	1	5	4	5	5	3	3	3	5	3	31	3	5	4	5	5	4	4	3	4	4	5	46	4	5	5	5	4	4	27	73	3	2	4	3	5	5	22	126
104	0	1996-06-11	2017-06-02	20.9747	1006	1	5	0	0	1	5	4	3	5	4	2	5	5	3	31	3	3	5	2	4	5	3	1	3	4	1	34	3	5	5	5	2	1	21	55	3	5	4	3	5	3	23	109
105	0	1995-09-11	2017-06-02	21.7248	1006	1	5	0	0	1	3	3	4	4	3	4	5	3	2	28	3	5	3	5	2	5	3	1	3	1	5	36	1	2	2	2	2	4	13	49	5	1	4	4	3	3	20	97
106	0	1995-09-19	2017-06-02	21.7029	1006	1	5	0	0	1	3	2	4	4	3	3	3	3	2	24	1	1	2	4	1	3	1	1	3	3	2	22	1	3	4	3	1	2	14	36	5	3	3	4	5	5	25	85
107	0	1995-09-15	2017-06-02	21.7139	1006	1	5	0	0	1	2	3	3	4	3	3	3	3	2	24	2	1	3	1	2	2	3	1	2	1	2	20	1	1	1	1	1	1	6	26	3	1	3	3	3	3	16	66
108	0	1989-02-10	2017-06-02	28.3066	1006	1	5	0	0	1	4	4	3	4	3	2	3	3	1	23	3	5	1	5	1	5	5	3	3	2	5	38	3	2	1	2	2	3	13	51	3	2	5	5	4	5	24	98
109	0	1996-05-19	2017-06-02	21.0376	1006	1	5	0	0	1	2	4	3	3	2	2	4	4	1	23	2	5	4	4	1	3	1	2	2	3	3	30	3	3	4	2	2	-9	5	35	4	2	2	3	2	5	18	76
110	0	1994-08-10	2017-06-02	22.8118	1006	1	5	0	0	1	3	3	4	5	3	3	3	4	2	27	2	2	4	4	3	3	2	2	2	2	2	28	1	1	3	2	1	2	10	38	3	4	4	5	5	5	26	91
111	0	1996-09-19	2017-06-02	20.7009	1006	1	5	0	0	1	4	5	5	3	3	4	3	2	3	28	2	3	2	4	2	4	4	1	3	4	4	33	3	2	2	1	1	3	12	45	5	4	2	4	4	3	22	95
112	0	1996-11-17	2017-06-02	20.5394	1006	1	5	0	0	1	5	4	3	5	4	3	3	5	4	31	3	4	3	4	5	5	4	2	5	5	5	45	5	5	5	2	4	4	25	70	2	2	1	3	5	4	17	118
113	0	1997-05-16	2017-06-02	20.0465	1006	1	5	0	0	1	3	4	4	4	3	3	4	4	3	29	3	5	2	1	2	3	5	1	2	2	3	29	2	3	2	3	2	4	16	45	3	3	3	3	2	2	16	90
114	0	1991-10-02	2017-06-02	25.6674	1006	1	5	1	1	1	4	3	4	5	3	2	1	4	4	26	5	4	2	4	5	5	4	1	4	5	5	44	5	2	2	1	4	5	19	63	5	2	3	2	5	2	19	108
115	0	1985-10-15	2007-06-02	21.629	1006	1	5	0	0	1	2	3	1	3	3	3	2	2	1	18	2	2	2	2	1	3	3	3	2	2	2	24	2	2	1	3	2	3	13	37	2	5	4	4	5	3	23	78
116	0	1995-11-09	2017-06-02	21.5633	1006	1	5	0	0	1	4	4	5	5	3	3	2	3	3	28	3	3	2	1	2	4	3	1	3	3	4	29	3	3	2	1	2	3	14	43	4	3	2	3	4	4	20	91
117	0	1996-07-08	2017-06-02	20.9008	1006	1	5	0	0	1	4	4	4	4	4	5	5	4	3	33	4	4	2	4	2	4	4	1	5	4	4	38	3	2	3	2	2	2	14	52	4	2	3	4	4	4	21	106
118	0	1995-01-09	2017-06-02	22.3956	1006	1	5	0	0	1	3	2	2	3	1	1	3	1	3	16	2	2	3	1	1	3	2	1	3	1	3	22	1	1	2	1	2	1	8	30	5	3	3	4	3	4	22	68
119	0	1994-10-28	2017-06-02	22.5955	1006	1	5	0	0	1	3	3	3	4	4	3	2	3	3	25	1	3	3	2	1	3	3	1	2	1	1	21	1	1	1	1	1	2	7	28	3	3	4	5	5	5	25	78
120	0	1994-06-01	2017-06-02	23.0034	1006	1	5	0	0	1	3	4	3	4	4	3	2	3	3	26	3	2	1	1	2	3	3	1	3	3	3	25	2	3	1	2	1	2	11	36	2	3	1	2	4	5	17	79
121	0	1996-06-19	2017-06-02	20.9528	1006	1	5	0	0	1	4	3	2	3	2	3	3	3	4	23	4	3	3	3	2	4	3	1	4	4	4	35	4	2	3	2	4	3	18	53	4	1	2	3	2	5	17	93
122	0	1995-01-23	2017-06-02	22.3573	1006	1	5	0	0	1	5	4	3	4	3	3	3	3	1	24	4	4	4	3	5	5	1	1	3	3	5	38	3	3	3	3	2	4	18	56	4	4	3	1	5	5	22	102
123	0	1994-09-17	2017-06-02	22.7077	1006	1	5	0	0	1	4	3	3	4	4	3	3	3	3	26	3	3	4	3	2	3	2	1	3	3	3	30	3	4	4	3	3	3	20	50	3	2	2	3	4	2	16	92
125	0	1995-12-10	2017-06-02	21.4784	1006	1	5	0	0	1	4	4	4	4	2	2	3	2	1	22	2	3	4	2	1	4	1	1	2	2	3	25	1	1	2	1	1	3	9	34	3	1	1	4	5	4	18	74
126	0	1996-02-01	2017-06-02	21.3333	1006	1	5	0	0	1	3	3	2	3	2	3	2	2	3	20	2	2	2	2	3	3	2	1	2	1	1	21	1	1	1	1	1	3	8	29	4	3	3	3	3	4	20	69
127	0	1996-09-25	2017-06-02	20.6845	1006	1	5	0	0	1	4	5	3	4	3	2	3	4	3	27	2	3	5	1	2	5	4	1	3	3	5	34	3	3	2	2	2	5	17	51	4	2	4	4	2	4	20	98
128	0	1995-09-09	2017-06-02	21.7303	1006	1	5	0	0	1	4	5	5	4	5	3	3	4	3	32	3	3	3	4	2	4	4	2	5	4	3	37	3	2	3	1	1	3	13	50	3	4	4	4	4	4	23	105
129	0	1996-03-13	2017-06-02	21.2211	1006	1	5	0	0	1	4	4	2	4	3	2	1	2	2	20	2	3	2	3	5	3	3	1	3	2	4	31	1	1	2	1	1	2	8	39	5	5	4	5	4	5	28	87
130	0	1994-02-17	2017-06-02	23.2882	1006	1	5	0	0	1	3	3	4	5	4	2	2	4	2	26	3	4	5	3	3	5	3	1	3	3	3	36	4	2	2	1	2	3	14	50	3	2	3	4	3	4	19	95
132	0	1995-10-30	2017-06-02	21.5907	1006	1	5	0	0	1	4	3	3	4	4	4	3	4	3	28	5	4	4	4	5	5	4	3	4	4	3	45	4	5	5	5	3	2	24	69	4	2	3	3	3	4	19	116
133	0	1996-08-01	2017-06-02	20.835	1006	1	5	0	0	1	3	4	2	3	3	2	1	3	2	20	1	4	3	1	3	4	3	1	3	2	3	28	2	1	1	1	1	2	8	36	4	2	3	3	2	4	18	74
134	0	1996-02-20	2017-06-02	21.2813	1006	1	5	0	0	1	4	3	3	3	4	2	2	2	2	21	4	3	3	3	1	3	4	1	3	4	4	33	4	4	3	2	5	4	22	55	4	1	5	3	4	4	21	97
135	0	1996-03-16	2017-06-02	21.2129	1006	1	5	0	0	1	3	4	3	2	4	2	2	3	3	23	1	2	3	3	4	4	3	1	3	4	4	32	3	2	4	1	4	5	19	51	3	3	1	2	5	4	18	92
136	0	1995-11-03	2017-06-02	21.5797	1006	1	5	0	0	1	5	3	3	4	4	4	-9	4	-9	4	2	3	2	3	2	2	1	2	4	4	3	28	3	2	3	1	4	3	16	44	2	2	2	2	4	4	16	64
137	0	1996-08-09	2017-06-02	20.8131	1006	1	5	0	0	1	4	4	3	3	4	2	3	3	1	23	2	2	1	2	3	4	1	2	3	3	3	26	2	2	4	3	2	4	17	43	3	1	5	1	4	2	16	82
138	0	1995-08-14	2017-06-02	21.8015	1006	1	5	0	0	1	3	3	3	5	4	4	5	3	2	29	3	2	3	2	4	4	3	2	4	4	4	35	3	4	3	3	2	4	19	54	3	3	1	2	4	5	18	101
139	0	1996-04-08	2017-06-02	21.1499	1006	1	5	0	0	1	5	4	4	5	3	4	5	3	5	33	3	5	3	5	5	3	2	1	5	4	5	41	4	2	2	4	2	5	19	60	3	1	2	3	3	4	16	109
140	0	1995-05-25	2017-06-02	22.0233	1006	1	5	0	0	1	3	4	4	4	3	2	2	5	3	27	3	2	2	3	1	5	3	2	2	4	5	32	3	4	2	1	2	3	15	47	3	4	3	5	5	5	25	99
141	0	1995-10-12	2017-06-02	21.64	1006	1	5	0	0	1	4	5	5	3	3	3	4	4	1	28	2	2	3	5	5	2	2	1	4	4	3	33	2	1	1	2	2	3	11	44	3	1	1	3	1	3	12	84
142	0	1994-02-14	2017-06-02	23.2964	1006	1	5	0	0	1	4	4	3	3	3	3	3	3	2	24	5	4	3	3	3	3	4	3	4	4	3	39	4	3	3	2	2	3	17	56	3	2	1	1	5	4	16	96
143	0	1996-09-16	2017-06-02	20.7091	1006	1	5	0	0	1	3	3	2	3	2	3	4	4	1	22	2	2	3	3	2	3	3	3	4	1	4	30	1	1	1	1	1	3	8	38	3	2	2	1	5	1	14	74
144	0	1995-12-29	2017-06-02	21.4264	1006	1	5	0	0	1	4	3	4	4	3	3	2	3	2	24	2	2	1	3	2	5	3	1	4	1	3	27	3	2	2	3	3	3	16	43	3	4	4	5	5	5	26	93
145	0	1996-12-22	2017-06-02	20.4435	1006	1	5	0	0	1	4	4	3	5	5	4	3	5	3	32	3	1	3	2	3	4	5	1	4	4	4	34	1	3	3	2	1	3	13	47	4	4	4	3	3	3	21	100
146	0	1995-09-08	2017-06-02	21.7331	1006	1	5	0	0	1	5	5	5	5	4	3	2	3	3	30	3	4	4	3	2	4	2	1	4	4	5	36	4	2	3	3	3	3	18	54	3	5	2	2	1	2	15	99
148	0	1995-09-27	2017-06-02	21.681	1006	1	5	0	0	1	5	3	2	4	2	1	3	2	3	20	3	3	4	2	5	1	4	3	4	4	5	38	4	2	4	2	2	4	18	56	2	1	2	1	2	2	10	86
150	0	1995-08-11	2017-06-02	21.8097	1006	1	5	0	0	1	3	5	5	3	2	3	4	4	3	29	3	3	3	4	5	3	5	2	5	4	5	42	5	2	2	2	4	3	18	60	5	3	3	4	5	5	25	114
151	0	1995-03-27	2017-06-02	22.1848	1006	1	5	0	0	1	5	3	3	4	5	3	3	2	2	25	3	2	4	2	1	2	4	1	4	5	1	29	2	4	3	4	3	4	20	49	4	1	2	1	2	3	13	87
152	0	1995-08-10	2017-06-02	21.8125	1006	1	5	0	0	1	5	4	2	5	4	3	3	3	3	27	4	4	5	5	4	4	4	1	4	4	4	43	4	1	5	1	3	3	17	60	3	1	1	5	3	5	18	105
153	0	1996-04-09	2017-06-02	21.1472	1006	1	5	0	0	1	5	5	5	5	5	5	5	4	2	36	2	2	2	2	3	5	2	2	3	4	4	31	3	3	4	2	3	4	19	50	2	2	2	2	5	4	17	103
154	0	1995-08-28	2017-06-02	21.7632	1006	1	5	0	0	1	3	4	3	3	2	3	3	5	2	25	1	2	1	2	1	3	3	1	3	3	4	24	2	1	2	1	2	3	11	35	4	5	3	2	3	3	20	80
155	0	1996-12-10	2017-06-02	20.4764	1006	1	5	0	0	1	4	3	3	4	3	3	2	3	2	23	2	3	4	3	4	3	3	1	2	1	5	31	1	3	2	3	2	3	14	45	5	5	5	4	4	4	27	95
156	0	1997-01-14	2017-06-07	20.3943	1006	1	3	0	0	1	3	4	2	4	3	3	3	4	3	26	4	3	3	3	3	2	2	2	4	3	3	32	3	1	2	2	2	3	13	45	3	2	1	2	4	4	16	87
159	0	1996-10-04	2017-06-07	20.6735	1006	1	3	0	0	1	4	3	2	3	2	3	2	3	2	20	1	1	2	3	3	3	3	3	3	1	3	26	2	1	1	2	1	2	9	35	4	4	3	3	3	4	21	76
160	0	1997-11-28	2017-06-07	19.5236	1006	1	3	0	0	1	5	5	3	4	4	2	1	3	1	23	3	4	5	2	1	5	3	1	5	5	3	37	4	4	4	3	1	3	19	56	5	2	3	3	2	5	20	99
161	0	1997-12-14	2017-06-07	19.4798	1006	1	3	0	0	1	4	4	2	4	4	2	2	4	2	24	3	3	3	4	1	3	1	3	4	4	4	33	4	3	3	1	1	3	15	48	2	3	5	2	2	3	17	89
162	0	1998-01-07	2017-06-07	19.4141	1006	1	3	0	0	1	4	4	2	4	2	2	1	3	1	19	3	4	3	2	1	2	2	1	3	3	4	28	3	1	2	3	4	4	17	45	2	4	3	2	5	5	21	85
163	0	1998-01-28	2017-06-07	19.3566	1006	1	3	0	0	1	5	5	3	5	5	4	5	5	4	36	2	3	5	2	4	3	1	1	1	4	5	31	1	3	2	3	3	5	17	48	3	3	2	2	2	3	15	99
164	0	1997-10-17	2017-06-07	19.6386	1006	1	3	0	0	1	5	5	4	5	2	5	5	5	5	36	4	4	4	3	5	5	5	4	5	5	1	45	5	5	5	5	5	5	30	75	1	1	3	2	5	5	17	128
165	0	1996-12-14	2017-06-07	20.4791	1006	1	3	0	0	1	5	4	3	4	4	5	3	4	4	31	2	5	3	2	1	5	4	2	4	4	3	35	4	4	4	4	3	3	22	57	2	3	2	3	2	3	15	103
166	0	1996-07-10	2017-06-07	20.909	1006	1	3	0	0	1	3	4	3	5	3	4	1	4	4	28	1	5	5	4	5	5	5	3	5	5	5	48	5	5	4	3	4	4	25	73	3	1	3	3	1	4	15	116
167	0	1997-10-22	2017-06-07	19.6249	1006	1	3	0	0	1	4	4	3	4	4	4	3	3	5	30	2	3	4	1	5	5	4	1	3	3	4	35	3	2	4	1	1	3	14	49	4	4	4	3	4	5	24	103
168	0	1997-10-25	2017-06-07	19.6167	1006	1	3	0	0	1	3	4	2	5	3	3	2	4	2	25	2	1	2	3	5	2	1	1	2	2	1	22	2	3	2	2	1	2	12	34	4	2	3	4	4	5	22	81
169	0	1997-10-02	2017-06-07	19.6797	1006	1	3	0	0	1	5	4	2	5	4	4	3	5	5	32	3	2	2	2	2	4	2	4	5	3	3	32	2	4	4	4	4	2	20	52	3	1	5	5	4	5	23	107
170	0	1998-02-25	2017-06-07	19.2799	1006	1	3	0	0	1	3	3	2	3	3	3	4	5	3	26	3	3	2	2	3	4	3	1	3	4	4	32	2	1	2	1	2	2	10	42	4	4	4	2	5	5	24	92
171	0	1998-03-28	2017-06-07	19.1951	1006	1	3	0	0	1	3	4	3	4	3	3	5	4	3	29	3	4	2	2	4	4	3	1	3	3	3	32	3	3	2	3	3	3	17	49	3	3	3	3	3	3	18	96
172	0	1998-03-07	2017-06-07	19.2526	1006	1	3	0	0	1	3	4	2	4	2	2	1	3	1	19	3	2	3	4	4	2	4	3	4	4	4	37	4	3	4	1	3	4	19	56	4	3	4	2	3	3	19	94
173	0	1998-01-03	2017-06-07	19.4251	1006	1	3	0	0	1	3	4	1	4	3	3	2	3	1	21	2	3	3	2	4	4	3	1	3	2	5	32	4	3	2	2	2	4	17	49	3	2	4	4	3	1	17	87
174	0	1996-08-30	2017-06-07	20.7693	1006	1	3	0	0	1	4	5	3	3	4	3	2	5	3	28	3	5	5	3	5	5	5	5	3	5	4	48	4	4	4	4	1	4	21	69	2	2	1	1	5	5	16	113
175	0	1996-08-16	2017-06-07	20.8077	1006	1	3	0	0	1	3	3	2	3	3	2	1	4	2	20	5	5	2	4	3	5	2	1	3	3	3	36	2	2	3	3	2	3	15	51	3	2	3	3	2	2	15	86
176	0	1997-09-11	2017-06-07	19.7372	1006	1	3	0	0	1	4	4	5	5	3	4	2	3	2	28	3	4	3	2	4	5	4	3	4	3	2	37	2	2	1	1	1	4	11	48	4	4	2	4	3	5	22	98
177	0	1997-09-13	2017-06-07	19.7317	1006	1	3	0	0	1	3	4	2	3	3	3	2	3	3	23	3	4	3	2	1	4	3	1	4	3	1	29	3	1	2	2	2	3	13	42	4	2	3	4	5	5	23	88
178	0	1993-05-30	2017-06-07	24.0219	1006	1	3	0	0	1	4	3	2	4	3	5	2	4	3	26	3	4	3	1	1	4	3	1	3	3	2	28	3	1	1	1	2	4	12	40	5	4	5	5	3	5	27	93
179	0	1997-11-17	2017-06-07	19.5537	1006	1	3	0	0	1	3	3	2	3	3	2	2	3	2	20	-9	4	4	2	3	5	2	2	3	2	3	21	3	2	3	2	2	3	15	36	2	2	2	3	2	2	13	69
180	0	1997-09-18	2017-06-07	19.718	1006	1	3	0	0	1	4	5	3	4	2	5	1	3	1	24	4	4	3	4	5	5	5	2	4	4	5	45	4	5	5	4	4	3	25	70	4	4	5	5	3	1	22	116
181	0	1996-08-22	2017-06-07	20.7912	1006	1	3	0	0	1	3	3	2	2	2	3	3	3	3	21	2	3	4	3	4	3	3	2	2	2	4	32	2	2	2	2	3	2	13	45	4	3	2	2	4	1	16	82
183	0	1997-08-06	2017-06-07	19.8357	1006	1	3	0	0	1	4	4	2	4	3	5	3	2	2	25	3	4	4	4	2	3	2	1	3	4	3	33	3	2	3	2	1	3	14	47	4	2	4	2	5	5	22	94
184	0	1996-11-08	2017-06-07	20.5777	1006	1	3	0	0	1	4	5	1	4	2	3	2	4	4	25	2	3	1	2	1	4	1	1	4	3	3	25	3	4	4	3	4	4	22	47	3	5	2	2	4	4	20	92
185	0	1998-04-25	2017-06-07	19.1184	1006	1	3	0	0	1	5	4	3	4	3	5	3	5	5	32	4	3	3	5	4	3	2	4	5	5	5	43	5	5	5	5	4	5	29	72	2	1	4	2	5	2	16	120
186	0	1997-09-22	2017-06-07	19.707	1006	1	3	0	0	1	4	3	3	5	4	3	4	3	4	29	4	4	-9	2	5	5	1	5	3	4	5	29	3	1	3	3	2	3	15	44	4	3	1	4	4	5	21	94
187	0	1997-09-20	2017-06-19	19.7454	1007	1	3	0	0	1	4	5	4	5	3	4	3	4	2	30	3	3	2	2	5	3	5	1	2	4	3	33	2	4	4	3	2	2	17	50	5	2	2	1	1	3	14	94
189	0	1997-11-13	2017-06-19	19.5975	1007	1	3	0	0	1	3	4	3	3	4	3	2	3	4	26	3	4	4	3	5	4	5	1	2	3	4	38	1	3	4	2	3	3	16	54	4	4	2	3	4	2	19	99
192	0	1997-06-09	2017-06-19	20.0274	1007	1	3	0	0	1	5	5	3	4	5	5	3	5	3	33	4	4	4	4	4	4	3	3	5	5	3	43	4	3	4	3	3	2	19	62	5	1	4	4	2	2	18	113
193	0	1998-06-13	2017-06-19	19.0171	1007	1	3	0	0	1	3	4	1	4	3	4	1	5	1	23	2	4	2	3	1	4	2	1	4	4	3	30	4	3	4	1	1	2	15	45	4	4	4	3	4	3	22	90
196	0	1996-12-09	2017-06-19	20.5257	1007	1	3	0	0	1	4	4	3	5	3	3	2	3	2	25	2	4	3	2	2	5	2	2	3	3	2	30	2	1	1	2	3	2	11	41	4	2	2	3	4	3	18	84
197	0	1998-04-04	2017-06-19	19.2088	1007	1	3	0	0	1	5	5	3	4	4	4	3	3	3	29	4	4	3	3	5	5	5	5	4	5	4	47	4	3	3	3	2	3	18	65	3	2	4	4	4	5	22	116
198	0	1997-12-03	2017-06-19	19.5428	1007	1	3	0	0	1	4	5	4	5	4	5	2	5	3	33	4	5	4	4	2	5	5	1	4	3	5	42	3	2	2	2	3	4	16	58	5	4	3	4	2	2	20	111
199	0	1998-06-25	2018-06-19	19.9836	1007	1	3	0	0	1	4	3	3	4	2	2	3	4	2	23	2	5	2	2	5	5	3	3	4	5	5	41	4	2	3	1	2	3	15	56	3	2	3	3	4	3	18	97
200	0	1998-01-30	2017-06-19	19.384	1007	1	3	0	0	1	4	3	2	3	3	3	3	3	3	23	3	3	4	1	5	3	2	2	3	3	4	33	3	2	2	3	2	4	16	49	2	2	5	2	4	4	19	91
201	0	1997-01-13	2017-06-19	20.4298	1007	1	3	0	0	1	3	4	2	2	3	2	3	4	2	22	2	4	3	3	4	5	2	1	3	3	3	33	2	3	3	3	2	4	17	50	3	2	3	5	5	5	23	95
203	0	1997-10-08	2017-06-19	19.6961	1007	1	3	0	0	1	5	5	1	5	5	3	4	5	3	31	2	5	1	4	1	5	5	3	5	5	5	41	5	5	4	5	1	5	25	66	3	4	1	1	5	3	17	114
204	0	1997-12-14	2017-06-19	19.5127	1007	1	3	0	0	1	4	4	1	3	2	4	3	2	3	22	1	4	1	2	1	1	3	1	3	2	4	23	2	1	1	1	2	3	10	33	1	2	2	3	1	2	11	66
205	0	1998-01-31	2017-06-19	19.3812	1007	1	3	0	0	1	4	5	2	5	5	4	1	2	3	27	1	3	2	1	1	1	2	1	3	3	1	19	1	1	3	3	1	3	12	31	1	3	3	3	3	5	18	76
207	0	1993-09-26	2017-06-19	23.729	1007	1	3	0	0	1	5	3	2	4	4	3	2	3	3	24	2	4	4	3	3	4	4	3	3	3	3	36	2	2	3	2	2	3	14	50	4	3	3	4	4	5	23	97
208	0	1996-01-05	2017-06-19	21.4538	1007	1	3	0	0	1	5	5	2	5	5	5	4	5	5	36	5	4	4	4	2	5	4	2	4	5	5	44	4	4	4	3	4	4	23	67	3	2	1	3	1	1	11	114
209	0	1996-08-14	2017-06-19	20.846	1007	1	3	0	0	1	5	5	4	5	5	4	5	5	5	38	3	5	5	2	4	5	5	1	4	4	4	42	5	5	5	5	5	5	30	72	2	3	1	3	5	4	18	128
210	0	1997-10-08	2017-06-19	19.6961	1007	1	3	0	0	1	4	4	3	4	4	5	3	4	2	29	4	4	4	4	4	4	2	3	4	4	3	40	4	4	4	2	2	2	18	58	3	4	3	4	3	3	20	107
213	0	1998-06-19	2017-06-19	19.0007	1007	1	3	0	0	1	4	4	3	4	3	1	2	4	2	23	2	3	3	2	1	4	3	1	2	2	2	25	1	3	3	4	2	3	16	41	2	2	3	3	3	5	18	82
215	0	1998-05-14	2017-06-19	19.0992	1007	1	3	0	0	1	4	3	3	4	3	3	4	4	5	29	3	4	4	4	5	5	5	2	4	4	2	42	3	4	3	4	3	5	22	64	2	1	2	1	4	4	14	107
219	0	1997-11-17	2017-06-19	19.5866	1007	1	3	0	0	1	5	5	3	3	3	2	4	4	4	28	4	4	4	5	5	3	3	3	4	4	4	43	4	4	4	3	4	3	22	65	3	1	2	2	3	2	13	106
223	0	1996-11-13	2017-06-19	20.5969	1007	1	3	0	0	1	4	3	3	4	3	3	2	3	2	23	4	4	3	3	3	4	3	3	3	3	4	37	3	3	3	3	2	3	17	54	4	3	2	4	3	4	20	97
224	0	1997-09-30	2017-06-19	19.718	1007	1	3	0	0	1	4	4	2	4	5	4	1	3	1	24	2	4	1	2	1	5	2	4	3	2	4	30	3	1	1	2	4	3	14	44	3	1	2	1	5	4	16	84
226	0	1998-04-15	2017-06-19	19.1786	1007	1	3	0	0	1	3	3	2	3	2	1	2	3	2	18	3	4	2	1	1	3	4	1	2	3	3	27	2	2	2	1	1	3	11	38	2	3	2	3	4	2	16	72
227	0	1998-01-08	2017-06-19	19.4442	1007	1	3	0	0	1	2	3	2	3	2	2	1	2	3	18	3	3	1	2	2	4	2	1	2	3	2	25	2	1	1	1	1	3	9	34	4	3	3	2	4	4	20	72
228	0	1998-04-19	2017-06-19	19.1677	1007	1	3	0	0	1	3	5	3	4	4	5	4	5	4	34	4	4	4	3	4	4	5	4	4	4	2	42	4	3	3	3	3	3	19	61	3	1	2	2	3	1	12	107
230	0	1998-02-19	2017-06-19	19.3292	1007	1	3	0	0	1	5	5	2	5	3	3	3	4	1	26	3	3	4	1	1	4	4	1	3	3	3	30	3	2	3	1	1	3	13	43	3	3	1	2	3	3	15	84
231	0	1996-12-13	2017-06-19	20.5147	1007	1	3	0	0	1	5	4	3	5	5	4	3	4	5	33	4	5	3	2	5	5	3	1	4	4	5	41	5	2	3	1	1	2	14	55	4	1	3	1	1	2	12	100
232	0	1992-10-01	2017-06-19	24.7146	1007	1	3	1	0	1	5	5	4	5	5	5	5	4	4	37	4	4	5	5	5	4	4	2	5	5	4	47	4	4	2	3	3	4	20	67	5	1	2	3	2	3	16	120
233	0	1997-10-27	2017-06-19	19.6441	1007	1	3	0	0	1	5	4	2	3	3	2	1	3	1	19	1	1	1	2	1	1	3	1	3	2	1	17	2	2	1	2	4	1	12	29	5	4	2	5	5	4	25	73
234	0	1998-06-14	2017-06-19	19.0144	1007	1	3	0	0	1	5	5	3	5	3	4	3	3	2	28	3	3	3	2	5	3	4	4	4	3	3	37	3	3	3	3	2	3	17	54	4	2	1	3	2	2	14	96
235	0	1997-11-19	2017-06-19	19.5811	1007	1	3	0	0	1	4	4	2	3	2	2	2	3	3	21	3	5	4	3	1	5	3	2	3	3	4	36	3	3	3	3	2	3	17	53	4	3	2	3	5	5	22	96
239	0	1997-05-24	2017-06-19	20.0712	1007	1	3	0	0	1	4	5	2	3	3	4	3	4	3	27	2	3	4	1	3	2	3	1	3	2	2	26	3	1	2	1	1	2	10	36	3	2	3	2	2	2	14	77
240	0	1997-08-21	2017-06-19	19.8275	1007	1	3	0	0	1	4	3	2	4	3	2	1	2	1	18	2	3	3	4	3	2	3	1	3	4	2	30	3	2	2	2	1	2	12	42	4	2	3	3	3	4	19	79
241	0	1996-10-07	2017-06-12	20.679	1008	1	5	0	0	1	4	4	2	3	3	2	4	4	2	24	2	3	2	4	5	3	3	1	3	4	4	34	3	2	2	2	3	3	15	49	3	2	2	3	5	4	19	92
242	0	1997-03-19	2017-06-12	20.2327	1008	1	5	0	0	1	4	4	3	3	4	2	3	3	3	25	2	3	3	2	4	4	4	3	2	3	3	33	4	4	3	3	3	3	20	53	2	3	2	3	3	2	15	93
243	0	1996-08-22	2017-06-12	20.8049	1008	1	5	0	0	1	3	3	3	3	3	3	4	3	2	24	3	3	4	3	2	3	4	2	4	4	3	35	3	3	3	2	3	4	18	53	3	2	3	2	2	3	15	92
244	0	1997-05-05	2017-06-12	20.104	1008	1	5	0	0	1	4	4	4	5	5	2	2	4	2	28	2	2	2	2	3	3	2	2	3	2	4	27	1	1	2	2	1	2	9	36	3	2	1	2	1	1	10	74
245	0	1996-11-22	2017-06-12	20.553	1008	1	5	0	0	1	4	3	3	4	3	3	2	3	4	25	3	3	2	2	4	3	2	3	4	4	2	32	4	3	3	3	2	4	19	51	3	3	1	2	3	3	15	91
247	0	1996-01-29	2017-06-12	21.3689	1008	1	5	0	0	1	4	3	2	4	3	3	3	4	4	26	3	3	3	2	2	2	1	1	3	3	2	25	4	1	1	1	2	2	11	36	4	2	4	3	4	4	21	83
248	0	1995-12-11	2017-06-12	21.5031	1008	1	5	0	0	1	1	2	1	1	2	1	1	1	1	10	1	1	2	1	1	2	1	1	1	1	1	13	1	1	1	1	1	1	6	19	1	1	1	5	2	5	15	44
249	0	1997-03-19	2017-06-12	20.2327	1008	1	5	0	0	1	3	4	2	3	4	1	1	3	1	19	1	4	2	3	3	5	3	1	3	4	5	34	2	2	5	3	1	4	17	51	3	4	1	4	3	5	20	90
250	0	1996-11-26	2017-06-12	20.5421	1008	1	5	0	0	1	4	4	3	4	3	3	3	3	2	25	3	4	3	2	4	4	4	2	3	2	4	35	2	3	3	3	2	3	16	51	3	2	4	4	3	5	21	97
251	0	1997-05-25	2017-06-15	20.0575	1008	1	3	0	0	1	4	4	3	3	3	3	2	4	2	24	3	3	3	3	5	5	2	4	4	3	5	40	3	3	2	2	4	4	18	58	3	1	2	3	2	3	14	96
252	0	1998-06-12	2017-06-15	19.0089	1008	1	3	0	0	1	4	3	2	3	4	4	3	4	2	25	2	3	2	1	2	3	4	1	3	4	2	27	3	2	2	1	1	2	11	38	4	3	3	3	3	3	19	82
253	0	1998-04-15	2017-06-15	19.1677	1008	1	3	0	0	1	5	4	2	4	3	3	2	3	2	23	2	4	2	3	4	4	2	1	3	3	2	30	3	3	3	3	2	3	17	47	1	2	2	3	2	4	14	84
254	0	1998-04-21	2017-06-15	19.1513	1008	1	3	0	0	1	4	4	2	4	2	3	3	3	2	23	3	3	3	4	2	3	4	1	3	2	4	32	3	2	3	3	3	2	16	48	3	2	2	4	4	4	19	90
255	0	1997-03-06	2017-06-15	20.2765	1008	1	3	0	0	1	4	4	3	4	3	2	2	3	1	22	3	3	3	4	1	2	3	3	2	2	2	28	1	1	1	2	1	2	8	36	3	4	5	4	4	5	25	83
256	0	1998-03-20	2017-06-15	19.2389	1008	1	3	0	0	1	3	4	3	4	3	4	3	4	3	28	3	3	4	5	4	4	3	1	4	5	4	40	4	1	2	1	1	3	12	52	4	2	3	3	4	4	20	100
259	0	1997-11-30	2017-06-15	19.54	1008	1	3	0	0	1	4	4	4	4	4	2	1	5	1	25	2	3	3	3	4	4	3	4	3	2	3	34	3	4	4	3	1	1	16	50	4	1	2	3	1	1	12	87
260	0	1991-12-30	2017-06-15	25.4593	1008	1	3	0	0	1	4	3	2	3	3	4	4	3	2	24	2	2	3	3	3	3	3	1	2	2	2	26	2	2	2	1	1	2	10	36	4	2	4	1	4	5	20	80
261	0	1997-11-17	2017-06-15	19.5756	1008	1	3	0	0	1	5	5	3	5	3	3	3	4	3	29	3	5	4	3	2	5	4	2	5	5	4	42	4	4	4	3	4	3	22	64	5	4	3	2	2	4	20	113
262	0	1998-02-28	2017-06-15	19.2936	1008	1	3	0	0	1	4	4	2	4	4	2	1	4	2	23	2	3	3	4	2	4	5	2	3	3	2	33	3	5	4	3	3	3	21	54	5	2	4	5	5	4	25	102
263	0	1997-05-15	2017-06-15	20.0849	1008	1	3	0	0	1	3	4	2	3	3	3	2	3	2	22	2	3	3	3	2	4	3	1	3	2	3	29	2	2	2	2	2	2	12	41	3	2	3	2	3	3	16	79
264	0	1996-10-20	2017-06-15	20.6516	1008	1	3	0	0	1	3	4	3	4	4	4	5	5	3	32	3	4	4	2	4	4	3	2	3	3	4	36	2	4	3	3	4	4	20	56	4	3	3	2	4	4	20	108
265	0	1998-02-19	2017-06-15	19.3183	1008	1	3	0	0	1	4	3	2	4	3	4	3	2	3	24	1	3	1	2	3	4	3	1	4	4	2	28	3	2	4	1	2	4	16	44	4	5	2	4	5	3	23	91
266	0	1997-12-02	2017-06-15	19.5346	1008	1	3	0	0	1	5	5	3	4	2	2	3	4	2	25	5	3	3	4	4	5	5	3	4	4	3	43	3	3	2	2	3	3	16	59	5	1	4	3	2	3	18	102
268	0	1996-08-21	2017-06-15	20.8159	1008	1	3	0	0	1	4	4	3	5	5	2	2	4	1	26	5	4	3	3	4	4	3	2	3	3	3	37	2	2	4	2	3	4	17	54	4	1	2	3	3	4	17	97
269	0	1996-08-12	2017-06-15	20.8405	1008	1	3	0	0	1	3	5	4	3	3	5	3	3	4	30	1	2	4	1	1	2	1	1	1	2	3	19	2	1	1	1	2	2	9	28	3	2	3	3	3	5	19	77
270	0	1997-08-20	2017-06-15	19.8193	1008	1	3	0	0	1	4	3	2	4	4	3	3	2	4	25	1	3	3	3	2	3	2	4	2	2	3	28	3	1	1	1	1	2	9	37	3	1	4	3	2	4	17	79
271	0	1997-10-27	2017-06-15	19.6331	1008	1	3	0	0	1	3	4	3	5	4	3	2	2	1	24	3	3	5	5	4	4	2	2	3	5	5	41	3	4	5	3	2	4	21	62	4	2	3	3	4	5	21	107
272	0	1996-07-04	2017-06-15	20.9473	1008	1	3	0	0	1	3	3	3	4	2	2	1	1	1	17	3	3	5	5	3	3	5	1	4	2	3	37	4	2	3	1	5	2	17	54	4	1	4	1	2	5	17	88
273	0	1996-10-12	2017-06-12	20.6653	1008	1	5	0	0	1	4	4	3	4	3	3	4	4	3	28	3	5	3	2	5	5	2	2	5	3	2	37	4	5	2	4	1	3	19	56	4	3	4	3	5	4	23	107
274	0	1996-10-10	2017-06-12	20.6708	1008	1	5	1	1	1	4	4	2	4	3	3	2	3	3	24	4	5	3	2	1	5	3	3	3	5	4	38	5	2	3	2	2	3	17	55	3	4	3	4	3	4	21	100
275	0	1994-10-07	2017-06-12	22.6804	1008	1	5	0	0	1	5	3	3	5	3	5	2	3	3	27	3	4	3	2	4	2	2	2	5	3	4	34	2	3	3	3	3	3	17	51	5	4	5	5	5	5	29	107
276	0	1996-07-07	2017-06-12	20.9309	1008	1	5	0	0	0	2	3	2	3	2	2	2	3	2	19	2	3	2	2	3	3	3	3	3	2	3	29	3	2	3	2	2	2	14	43	3	3	3	3	3	3	18	80
278	0	1996-04-24	2017-06-12	21.1335	1008	1	5	0	0	1	4	5	4	5	4	4	2	5	3	32	3	5	4	2	3	5	4	1	4	3	5	39	3	3	4	3	2	3	18	57	3	2	3	2	2	5	17	106
280	0	1994-04-19	2017-06-12	23.1485	1008	1	5	0	0	1	3	3	2	4	4	3	3	4	3	26	4	2	4	3	1	3	3	2	3	4	3	32	2	1	1	2	2	3	11	43	4	3	3	3	2	3	18	87
281	0	1991-08-30	2017-06-12	25.7851	1008	1	5	0	0	1	2	3	3	3	2	3	2	3	2	21	3	2	2	3	4	2	2	1	2	1	3	25	1	2	2	2	2	2	11	36	2	2	2	2	2	3	13	70
282	0	1997-03-24	2017-06-12	20.219	1008	1	5	0	0	1	5	3	2	4	2	4	2	2	2	21	4	4	4	5	2	5	4	1	4	5	5	43	5	4	4	4	5	4	26	69	4	2	2	4	4	1	17	107
285	0	1996-07-20	2017-06-12	20.8953	1008	1	5	0	0	1	3	3	1	3	2	2	2	3	1	17	1	3	3	2	3	3	3	2	2	2	1	25	1	2	2	2	2	2	11	36	3	1	3	3	3	4	17	70
286	0	1997-03-04	2017-06-12	20.2738	1008	1	5	0	0	1	4	4	3	5	5	4	1	5	3	30	2	3	3	3	4	3	3	1	4	3	2	31	3	3	3	2	2	2	15	46	4	2	3	3	2	3	17	93
288	0	1996-10-08	2017-06-12	20.6762	1008	1	5	0	0	1	5	4	2	3	2	2	2	3	1	19	3	3	3	4	2	2	4	1	4	3	5	34	5	5	4	2	4	3	23	57	5	4	2	4	5	4	24	100
289	0	1997-02-17	2017-06-12	20.3149	1008	1	5	0	0	1	5	4	2	4	5	3	3	4	3	28	3	4	3	4	3	4	4	2	3	4	3	37	3	3	2	3	2	2	15	52	4	2	3	3	5	3	20	100
290	0	1997-03-17	2017-06-12	20.2382	1008	1	5	0	0	1	4	5	4	5	5	4	5	5	3	36	4	4	3	3	4	5	5	4	4	5	4	45	5	4	3	3	2	4	21	66	4	3	4	4	5	3	23	125
291	0	1993-07-27	2017-06-12	23.8768	1008	1	7	0	0	1	4	4	3	4	3	3	2	4	3	26	4	3	3	2	1	3	3	3	4	3	3	32	3	3	3	2	3	3	17	49	2	2	1	1	5	4	15	90
292	0	1995-08-03	2017-06-12	21.859	1008	1	7	0	0	1	4	4	2	3	3	3	4	2	1	22	3	4	4	3	4	4	4	2	5	4	4	41	4	3	2	2	3	3	17	58	3	2	3	3	3	3	17	97
293	0	1996-11-20	2017-06-12	20.5585	1008	1	5	0	0	1	4	4	3	5	4	3	3	3	2	27	4	4	4	2	3	3	4	3	3	3	2	35	3	2	2	2	3	3	15	50	4	3	2	3	3	5	20	97
294	0	1997-04-30	2017-06-12	20.1177	1008	1	5	0	0	1	4	4	2	3	3	3	2	4	3	24	1	4	3	1	2	5	2	1	5	5	5	34	3	4	2	3	3	3	18	52	4	1	5	4	5	5	24	100
295	0	1995-07-27	2017-06-12	21.8782	1008	1	7	1	0	1	5	5	3	5	5	4	5	4	4	35	4	5	4	5	2	4	4	3	4	4	4	43	4	3	4	2	3	4	20	63	3	3	3	3	3	4	19	117
296	0	1996-07-30	2017-06-12	20.8679	1008	1	5	0	0	1	4	4	3	4	4	2	2	2	1	22	1	1	2	3	1	2	3	1	4	4	4	26	1	3	2	2	2	2	12	38	4	4	4	5	4	4	25	85
297	0	1994-02-18	2017-06-12	23.3128	1008	1	5	0	0	1	3	3	2	3	2	2	2	3	2	19	2	2	2	1	1	3	2	1	2	2	2	20	2	2	2	2	1	2	11	31	3	3	3	3	3	4	19	69
298	0	1996-06-27	2017-06-12	20.9582	1008	1	5	0	0	1	5	4	3	3	3	4	2	4	3	26	2	2	3	3	1	2	3	1	3	3	2	25	2	3	4	2	1	2	14	39	3	2	2	2	2	3	14	79
299	0	1991-01-02	2017-06-12	26.4422	1008	1	7	0	0	1	4	3	2	4	3	3	2	3	1	21	1	3	3	3	3	2	3	3	2	3	3	29	2	1	2	2	1	3	11	40	5	2	4	3	3	3	20	81
300	0	1992-10-12	2017-06-12	24.6653	1008	1	8	0	0	1	4	4	5	5	4	2	5	3	2	30	4	4	4	4	5	4	4	2	4	5	5	45	4	5	5	4	4	5	27	72	4	2	2	1	4	5	18	120
301	0	1995-03-04	2017-06-12	22.2752	1008	1	7	0	0	1	3	3	1	4	3	2	2	3	1	19	2	2	1	1	1	3	3	1	3	1	3	21	2	1	2	1	1	3	10	31	3	2	4	3	4	4	20	70
302	0	1995-12-08	2017-06-12	21.5113	1008	1	7	0	0	1	4	2	3	4	4	4	4	4	2	27	3	4	3	3	4	2	4	1	3	3	3	33	3	2	1	1	1	3	11	44	3	3	2	3	3	2	16	87
303	0	1996-02-23	2017-06-12	21.3005	1008	1	5	0	0	1	5	4	3	4	4	2	2	3	2	24	3	2	4	2	4	3	3	2	4	3	4	34	3	3	3	3	2	3	17	51	5	2	4	4	3	5	23	98
304	0	1994-12-16	2017-06-12	22.4887	1008	1	7	0	0	1	4	3	3	3	3	2	3	3	2	22	3	3	3	3	2	3	3	3	3	3	3	32	3	3	3	2	2	3	16	48	2	2	3	3	5	5	20	90
305	0	1995-12-05	2017-06-19	21.5387	1009	1	7	0	0	0	4	3	4	3	3	2	2	2	3	22	4	4	5	5	4	3	4	1	3	4	4	41	2	3	3	1	3	3	15	56	4	2	3	5	2	5	21	99
308	0	1997-10-19	2017-06-19	19.666	1009	1	3	0	0	1	3	3	2	3	2	3	3	3	3	22	2	2	2	2	3	4	3	1	2	2	3	26	2	2	2	2	2	3	13	39	3	2	3	2	3	3	16	77
309	0	1998-06-03	2017-06-19	19.0445	1009	1	3	0	0	1	3	4	1	5	3	5	2	4	2	26	1	2	3	1	3	2	2	1	3	2	3	23	2	2	2	1	1	3	11	34	4	3	4	4	5	5	25	85
310	0	1997-12-27	2017-06-19	19.4771	1009	1	3	0	0	1	4	5	3	4	4	4	4	5	3	32	3	3	5	3	1	5	5	3	4	5	4	41	5	2	4	1	3	4	19	60	3	1	1	2	2	3	12	104
312	0	1994-10-26	2017-06-19	22.6475	1009	1	3	0	0	1	5	3	3	4	3	4	3	3	3	26	4	4	5	3	3	4	4	2	5	4	4	42	4	4	4	3	5	4	24	66	2	2	3	1	4	4	16	108
313	0	1997-04-02	2017-06-19	20.2136	1009	1	5	0	0	1	4	1	1	5	1	5	3	2	2	20	4	3	4	4	5	5	3	3	4	4	4	43	4	4	5	2	2	4	21	64	2	1	4	4	5	5	21	105
314	0	1993-06-30	2017-06-19	23.9699	1009	1	3	0	0	1	5	3	1	3	2	3	4	3	1	20	1	4	2	4	3	5	1	1	4	2	5	32	1	3	4	1	3	2	14	46	3	1	2	4	4	5	19	85
315	0	1995-06-24	2017-06-19	21.9877	1009	1	3	0	0	1	4	4	4	5	2	4	3	3	3	28	4	4	4	3	2	3	3	2	3	3	3	34	3	1	2	1	4	4	15	49	4	2	3	3	4	3	19	96
317	0	1998-05-09	2017-06-19	19.1129	1009	1	3	0	1	1	5	4	1	4	1	3	1	5	4	23	1	3	2	1	1	3	1	1	3	4	3	23	2	2	1	1	1	3	10	33	1	5	3	1	5	1	16	72
318	0	1995-05-19	2017-06-19	22.0862	1009	1	6	0	0	1	5	4	3	5	4	5	5	5	3	34	5	5	3	2	3	4	3	3	5	5	5	43	5	5	5	3	4	5	27	70	2	1	2	1	2	2	10	114
319	0	1994-12-20	2017-06-19	22.4969	1009	1	3	0	0	1	4	5	3	5	5	5	4	5	5	37	5	3	3	3	4	2	4	5	3	5	5	42	5	2	4	1	4	5	21	63	1	3	4	5	5	3	21	121
321	0	1994-06-25	2017-06-19	22.9843	1009	1	3	0	0	1	3	3	1	4	3	4	2	3	2	22	2	2	3	2	2	3	2	3	3	2	3	27	2	3	3	3	2	3	16	43	3	3	3	3	3	4	19	84
325	0	1996-06-06	2017-06-19	21.0349	1009	1	3	0	0	1	4	5	3	4	5	4	3	3	5	32	3	2	3	2	4	3	2	1	3	4	3	30	2	3	4	2	1	2	14	44	2	1	3	4	4	2	16	92
327	0	1997-11-22	2017-06-19	19.5729	1009	1	3	1	0	1	4	4	3	3	3	4	3	4	2	26	3	3	3	2	4	4	2	3	3	3	3	33	4	3	2	4	2	3	18	51	3	2	2	2	4	3	16	93
332	0	1996-11-29	2017-06-19	20.553	1009	1	3	0	0	1	5	3	3	3	3	4	3	3	3	25	4	4	4	2	5	4	4	3	4	4	4	42	4	4	4	4	3	4	23	65	3	3	4	2	2	4	18	108
333	0	1996-12-11	2017-06-19	20.5202	1009	1	5	0	0	1	3	3	3	2	2	3	2	3	4	22	3	2	1	3	5	4	2	1	3	2	4	30	2	1	2	2	2	3	12	42	3	1	2	3	4	2	15	79
334	0	1995-02-08	2017-06-19	22.36	1009	1	7	0	0	1	4	3	3	3	3	3	3	3	3	24	3	4	4	4	3	4	4	3	3	3	4	39	4	4	3	3	3	3	20	59	3	3	3	2	4	3	18	101
335	0	1997-10-10	2017-06-19	19.6906	1009	1	3	0	0	1	5	4	3	5	3	4	5	5	4	33	4	3	3	4	2	4	4	2	4	4	2	36	5	4	4	3	4	5	25	61	3	2	1	2	3	3	14	108
336	0	1998-04-14	2017-06-19	19.1814	1009	1	3	0	0	1	4	3	3	4	3	3	4	4	5	29	4	3	4	3	3	3	2	3	3	3	4	35	3	2	2	3	4	4	18	53	4	2	2	2	4	3	17	99
339	0	1997-05-22	2017-06-19	20.0767	1009	1	5	0	0	1	5	4	3	3	2	4	3	2	4	25	4	3	4	4	3	3	3	1	4	4	4	37	4	4	4	4	3	4	23	60	2	3	2	2	2	2	13	98
340	0	1998-01-27	2017-06-19	19.3922	1009	1	3	0	0	1	5	5	2	5	5	5	5	5	1	33	3	2	5	4	1	4	4	1	1	1	2	28	3	2	1	1	3	5	15	43	4	1	1	1	5	5	17	93
343	0	1998-06-26	2017-06-19	18.9815	1009	1	3	0	0	1	4	3	2	4	4	4	3	4	2	26	2	2	3	3	4	4	5	1	3	3	1	31	3	3	2	2	1	4	15	46	3	1	3	1	3	4	15	87
344	0	1997-04-03	2017-06-19	20.2108	1009	1	3	0	0	1	5	3	3	3	2	4	2	2	5	24	2	4	5	3	-9	5	2	5	3	5	5	30	5	2	4	4	3	4	22	52	4	2	2	4	4	4	20	96
347	0	1998-03-11	2017-06-19	19.2745	1009	1	3	0	0	1	4	4	3	3	2	2	3	3	1	21	2	1	4	1	1	3	2	1	4	4	1	24	3	1	1	1	1	2	9	33	5	3	3	4	2	2	19	73
348	0	1997-01-26	2017-06-19	20.3943	1009	1	3	0	0	1	5	4	2	3	2	3	3	4	1	22	3	4	4	4	5	3	3	1	3	4	4	38	4	4	3	2	2	3	18	56	3	2	4	3	3	2	17	95
351	0	1996-08-08	2017-06-19	20.8624	1009	1	3	0	0	1	4	4	5	5	3	2	3	4	4	30	4	4	2	2	3	4	2	2	2	4	4	33	4	3	3	2	2	3	17	50	2	2	4	1	4	5	18	98
353	0	1996-09-23	2017-06-19	20.7365	1009	1	3	0	0	1	3	4	2	4	2	3	2	-9	3	11	1	1	2	1	3	3	1	1	2	2	2	19	1	1	1	1	1	2	7	26	4	4	4	3	5	5	25	62
354	0	1998-06-17	2017-06-19	19.0062	1009	1	3	0	0	1	5	4	3	4	3	3	3	4	3	27	4	4	3	3	4	5	5	4	5	5	5	47	5	3	3	3	3	5	22	69	3	2	5	4	3	3	20	116
356	0	1995-11-24	2017-06-19	21.5688	1009	1	3	0	0	1	5	3	3	5	2	3	2	3	3	24	4	4	5	3	5	2	4	4	4	5	5	45	4	3	3	1	3	4	18	63	3	3	5	2	2	2	17	104
357	0	1997-07-30	2017-06-19	19.8877	1009	1	3	0	0	1	2	3	2	3	2	2	1	2	2	17	1	2	2	1	1	1	2	1	1	2	2	16	1	1	1	2	4	2	11	27	4	5	2	4	3	3	21	65
359	0	1997-02-07	2017-06-19	20.3614	1009	1	3	0	0	1	5	4	4	5	4	4	4	5	4	34	3	4	4	4	2	4	4	2	4	4	4	39	4	4	4	4	4	4	24	63	3	3	3	4	3	3	19	116
362	0	1997-12-10	2017-06-19	19.5236	1009	1	3	0	0	1	4	5	2	4	3	5	2	5	1	27	4	3	4	1	2	4	1	1	5	4	2	31	5	2	3	1	2	5	18	49	1	1	3	1	1	1	8	84
363	0	1994-08-14	2017-06-19	22.8474	1009	1	7	0	0	1	4	4	2	4	2	3	3	3	4	25	4	4	3	3	4	5	3	1	3	3	3	36	3	3	3	3	1	3	16	52	4	4	2	4	4	4	22	99
364	0	1997-02-25	2017-06-19	20.3121	1009	1	5	0	0	1	3	3	3	3	3	5	3	3	5	28	5	5	5	3	3	4	4	5	4	4	5	47	4	4	4	1	3	5	21	68	2	1	2	3	3	2	13	109
366	0	1996-06-19	2017-06-19	20.9993	1009	1	5	0	0	1	4	3	3	4	2	3	2	3	2	22	3	4	3	2	5	2	1	3	3	4	1	31	2	4	2	3	4	3	18	49	2	3	2	4	5	2	18	89
367	0	1991-05-08	2017-06-19	26.1164	1009	1	5	1	1	1	4	4	4	5	3	3	3	3	4	29	4	3	3	3	4	4	1	1	4	4	4	35	4	2	2	1	1	2	12	47	4	4	3	3	4	5	23	99
369	0	1990-01-18	2017-06-19	27.4168	1009	1	5	0	0	1	5	5	5	3	3	5	3	5	5	34	3	3	2	5	5	2	3	1	5	5	5	39	5	4	4	5	5	5	28	67	3	5	5	1	1	1	16	117
370	0	1994-06-08	2017-06-19	23.0308	1009	1	5	0	0	1	5	5	2	4	4	2	2	2	3	24	3	3	3	3	2	4	4	2	2	3	2	31	3	2	3	2	2	2	14	45	4	4	3	4	4	2	21	90
371	0	1996-04-02	2017-06-19	21.2129	1009	1	5	0	0	1	4	3	2	3	3	2	2	3	3	21	3	2	5	2	1	3	2	1	3	2	3	27	2	2	3	1	1	2	11	38	3	3	3	3	4	5	21	80
373	0	1994-01-10	2017-06-19	23.4387	1009	1	5	0	0	1	4	5	2	5	4	5	5	4	5	35	4	5	5	4	3	5	2	3	4	4	2	41	4	3	4	2	4	5	22	63	4	1	4	4	4	5	22	120
374	0	1997-02-07	2017-06-19	20.3614	1009	1	5	0	0	1	5	5	4	5	1	3	3	4	5	30	5	4	5	5	5	4	4	4	5	5	4	50	5	5	5	3	4	3	25	75	5	2	2	3	3	3	18	123
375	0	1995-06-14	2017-06-19	22.0151	1009	1	5	0	0	1	4	5	5	5	5	5	3	5	3	36	4	3	3	3	5	5	5	3	4	5	5	45	5	5	5	3	4	5	27	72	5	2	3	3	3	4	20	128
376	0	1995-11-28	2017-06-19	21.5578	1009	1	5	0	0	1	5	5	3	4	5	3	5	3	3	31	5	5	5	5	4	4	4	4	5	5	5	51	5	5	5	4	5	4	28	79	4	3	5	3	5	5	25	135
377	0	1997-01-13	2017-06-19	20.4298	1009	1	5	0	0	1	4	4	3	5	4	5	3	3	2	29	1	3	5	3	2	3	2	1	5	2	3	30	3	2	3	2	2	3	15	45	3	2	2	2	3	2	14	88
378	0	1996-11-18	2017-06-19	20.5832	1009	1	5	0	1	1	4	5	2	5	3	5	5	3	5	33	4	4	5	5	3	5	2	5	4	5	3	45	5	3	3	3	4	4	22	67	4	2	2	3	1	2	14	114
379	0	1996-03-30	2017-06-19	21.2211	1009	1	5	0	0	1	5	5	4	5	5	5	3	5	3	35	5	5	5	5	4	5	5	2	5	5	5	51	5	5	5	5	5	5	30	81	4	1	2	1	2	3	13	129
383	0	1993-12-22	2017-06-19	23.4908	1009	1	5	0	0	1	5	3	3	3	2	3	3	3	3	23	4	4	2	3	5	4	2	1	4	5	4	38	5	3	3	3	4	4	22	60	2	3	2	3	2	4	16	99
385	0	1996-03-23	2017-06-19	21.2402	1009	1	5	1	1	1	5	3	2	5	1	5	5	5	5	31	4	4	5	4	4	5	5	2	5	5	5	48	5	5	5	2	5	5	27	75	4	1	2	1	5	2	15	121
386	0	1996-12-10	2017-06-19	20.5229	1009	1	5	0	0	1	5	5	2	4	2	3	3	4	3	26	4	5	4	3	1	4	4	4	2	4	4	39	3	1	2	2	3	3	14	53	3	1	2	1	3	3	13	92
387	0	1996-08-07	2017-06-19	20.8652	1009	1	5	1	0	1	3	5	2	4	3	3	4	4	3	28	2	3	3	3	3	3	3	1	4	3	3	31	4	3	2	2	3	3	17	48	4	3	2	3	4	3	19	95
388	0	1997-04-07	2017-06-19	20.1999	1009	1	5	0	0	1	3	3	2	3	2	2	4	2	2	20	4	3	2	2	3	4	2	1	3	3	2	29	2	3	2	2	3	3	15	44	3	2	3	4	4	4	20	84
391	0	1995-03-08	2017-06-19	22.2834	1009	1	5	0	0	1	5	5	4	5	3	3	3	4	3	30	4	4	5	4	5	5	4	4	5	5	5	50	5	3	4	3	4	5	24	74	2	1	4	2	3	4	16	120
392	0	1996-02-08	2017-06-19	21.3607	1009	1	5	0	0	1	4	5	3	4	5	3	3	4	2	29	4	3	2	4	3	3	2	2	4	3	5	35	4	4	2	2	3	2	17	52	5	3	2	5	4	5	24	105
393	0	1993-12-27	2017-06-19	23.4771	1009	1	5	0	0	1	5	5	5	5	3	3	4	4	4	33	3	4	3	2	5	4	3	3	4	4	4	39	3	3	3	3	3	3	18	57	4	2	3	2	3	5	19	109
394	0	1997-02-12	2017-06-19	20.3477	1009	1	5	0	0	1	4	4	3	3	3	4	2	3	3	25	3	4	3	2	3	4	4	3	4	3	3	36	3	1	2	1	1	3	11	47	4	2	-9	3	5	4	9	81
395	0	1996-05-01	2017-06-19	21.1335	1009	1	5	0	0	1	4	3	4	5	2	2	3	3	2	24	3	2	3	2	4	2	3	3	2	3	4	31	2	1	1	1	1	3	9	40	4	3	3	4	4	4	22	86
397	0	1995-12-22	2017-06-19	21.4921	1009	1	5	0	0	1	2	4	2	3	2	3	2	5	2	23	2	4	2	5	1	5	2	4	3	3	3	34	3	2	4	3	2	4	18	52	3	1	2	2	5	2	15	90
401	0	1994-03-28	2017-06-19	23.2279	1009	1	5	0	0	1	4	4	3	4	4	3	3	5	4	30	2	3	3	1	5	4	3	1	4	3	3	32	3	2	1	1	3	5	15	47	3	2	3	2	4	4	18	95
402	0	1993-07-23	2017-06-19	23.9069	1009	1	5	0	0	1	4	4	2	4	3	3	4	4	1	25	3	3	3	1	1	4	1	1	3	3	5	28	3	4	4	2	4	4	21	49	4	1	4	3	5	3	20	94
403	0	1996-11-30	2017-06-19	20.5503	1009	1	5	0	0	1	4	3	2	3	2	2	4	1	-9	8	2	1	3	1	4	3	1	1	3	1	1	21	1	1	1	3	3	2	11	32	3	1	3	3	2	3	15	55
404	0	1994-09-24	2017-06-19	22.7351	1009	1	5	0	0	1	3	3	2	4	3	5	4	4	2	27	1	1	1	1	1	3	3	3	3	3	2	22	1	1	1	2	1	3	9	31	1	1	4	4	5	5	20	78
405	0	1996-04-13	2017-06-19	21.1828	1009	1	5	0	0	1	3	3	3	3	2	3	4	3	1	22	1	2	2	2	1	3	1	1	2	2	3	20	2	3	2	2	1	2	12	32	3	1	2	3	4	4	17	71
406	0	1996-07-04	2017-06-19	20.9582	1009	1	5	0	0	1	5	5	4	5	5	4	3	4	3	33	2	4	4	2	4	4	2	1	4	4	3	34	2	1	3	1	1	3	11	45	4	1	4	3	2	5	19	97
409	0	1995-03-27	2017-06-19	22.2313	1009	1	5	0	0	1	4	4	3	4	3	5	4	4	2	29	4	4	5	3	2	4	4	3	4	4	3	40	4	3	4	2	4	3	20	60	4	1	4	4	3	2	18	107
410	0	1996-08-27	2017-06-19	20.8104	1009	1	5	0	0	1	4	4	3	4	3	3	4	3	3	27	2	5	4	3	3	5	3	1	4	4	4	38	3	3	3	3	2	3	17	55	3	2	3	3	2	-9	4	86
414	0	1996-12-22	2017-06-19	20.4901	1009	1	5	0	0	1	3	2	3	4	1	4	1	2	3	20	2	3	4	1	5	4	3	1	3	3	4	33	2	2	1	2	1	2	10	43	3	3	4	5	5	3	23	86
415	0	1996-03-21	2017-06-19	21.2457	1009	1	5	0	0	1	5	3	3	3	2	3	4	3	2	23	4	5	4	5	3	4	5	4	4	5	4	47	4	4	4	2	3	3	20	67	4	4	5	4	5	5	27	117
417	0	1998-02-07	2017-06-08	19.332	1010	1	3	0	0	1	4	4	2	3	3	1	1	3	1	18	2	5	3	2	3	5	5	1	5	5	2	38	5	4	4	3	3	2	21	59	5	5	2	5	4	5	26	103
418	0	1996-10-23	2017-06-08	20.6242	1010	1	3	0	0	1	5	4	3	5	3	1	2	3	1	22	1	4	3	4	1	3	3	2	5	5	3	34	5	4	3	2	2	3	19	53	2	3	3	4	4	4	20	95
419	0	1997-12-20	2017-06-08	19.4661	1010	1	3	0	0	1	5	4	2	3	2	3	4	5	3	26	4	4	4	5	5	5	3	2	4	5	4	45	5	4	5	4	4	4	26	71	2	1	4	3	3	3	16	113
420	0	1997-11-04	2017-06-08	19.5921	1010	1	3	0	0	1	3	4	3	5	2	3	2	3	1	23	2	4	3	1	4	5	5	1	5	5	5	40	5	3	3	2	3	3	19	59	4	1	3	3	2	5	18	100
421	0	1990-01-01	2017-06-08	27.4333	1010	1	3	0	0	1	4	4	4	4	4	3	3	4	3	29	4	4	4	4	4	5	3	3	4	5	5	45	3	3	4	3	3	4	20	65	4	3	3	3	4	3	20	114
422	0	1997-06-18	2017-06-08	19.9726	1010	1	3	1	0	1	5	5	3	5	4	3	2	5	3	30	3	5	4	3	3	5	5	3	5	4	5	45	3	2	3	1	4	4	17	62	4	2	3	3	3	4	19	111
423	0	1997-11-10	2017-06-08	19.5756	1010	1	3	0	0	1	4	4	2	5	5	5	5	5	4	35	3	4	1	3	2	3	3	1	4	4	2	30	2	2	3	1	1	3	12	42	3	4	3	4	3	5	22	99
424	0	1997-05-13	2017-06-08	20.0712	1010	1	3	1	1	1	-9	4	5	5	4	4	5	4	3	34	5	5	3	5	5	5	4	5	5	5	5	52	5	5	5	5	5	5	30	82	3	1	1	1	3	1	10	126
425	0	1997-06-18	2017-06-08	19.9726	1010	1	3	0	0	1	5	4	3	5	4	5	3	4	4	32	5	5	5	1	5	5	5	1	4	4	5	45	4	3	3	3	2	4	19	64	3	3	4	5	4	3	22	118
426	0	1995-11-03	2017-06-08	21.5962	1010	1	3	0	0	1	4	5	3	5	4	5	3	5	4	34	3	3	4	3	1	3	1	1	3	4	3	29	3	4	3	2	1	2	15	44	4	3	2	3	4	5	21	99
427	0	1996-11-26	2017-06-08	20.5311	1010	1	3	0	0	1	5	4	3	4	3	3	2	3	2	24	3	4	4	3	2	5	4	3	4	4	4	40	4	4	4	3	2	3	20	60	3	3	2	3	4	4	19	103
428	0	1995-11-14	2017-06-08	21.5661	1010	1	3	0	0	1	4	3	1	4	1	4	1	4	3	21	4	3	5	4	5	5	4	1	4	5	3	43	4	3	4	3	3	4	21	64	4	3	4	4	5	4	24	109
429	0	1997-12-23	2017-06-08	19.4579	1010	1	3	0	0	1	4	3	2	3	3	3	4	4	3	25	3	3	4	4	4	4	3	3	3	3	2	36	3	3	3	2	2	2	15	51	4	2	2	2	2	4	16	92
430	0	1997-06-24	2017-06-08	19.9562	1010	1	3	0	0	1	4	4	3	4	3	2	2	3	1	22	2	3	3	3	4	4	3	2	3	3	4	34	3	3	3	3	2	4	18	52	4	1	3	3	3	2	16	90
431	0	1996-04-10	2017-06-08	21.1608	1010	1	3	0	0	1	4	4	2	3	4	2	2	3	4	24	3	4	5	4	1	4	5	4	5	3	5	43	5	5	5	4	5	4	28	71	2	3	1	2	3	2	13	108
432	0	1998-01-24	2017-06-08	19.3703	1010	1	3	0	0	1	5	4	3	5	5	5	5	5	5	37	3	3	5	2	5	4	2	2	4	5	4	39	4	3	3	2	3	4	19	58	4	5	5	4	4	4	26	121
433	0	1998-03-03	2017-06-08	19.2663	1010	1	3	0	0	1	5	5	3	5	3	3	5	2	5	31	4	4	3	2	2	5	5	1	4	4	5	39	3	2	3	1	2	2	13	52	5	2	2	1	3	3	16	99
434	0	1997-09-24	2017-06-08	19.7043	1010	1	3	0	0	1	5	5	3	5	4	4	3	4	3	31	3	3	4	2	4	3	5	1	4	3	4	36	2	2	2	1	1	3	11	47	3	2	4	2	4	5	20	98
435	0	1998-03-17	2017-06-08	19.2279	1010	1	3	0	0	1	4	4	3	5	3	5	3	5	3	31	3	3	3	1	2	5	3	1	4	3	4	32	3	2	2	3	2	3	15	47	5	1	4	2	4	3	19	97
436	0	1996-12-13	2017-06-08	20.4846	1010	1	3	0	0	1	5	4	3	5	2	4	5	3	5	31	2	4	4	4	1	5	1	1	5	5	5	37	4	4	4	4	4	4	24	61	4	5	5	5	5	5	29	121
437	0	1995-02-05	2017-06-08	22.3381	1010	1	3	0	0	1	3	4	2	3	2	3	2	4	3	23	3	5	3	2	1	4	3	1	4	3	5	34	4	2	3	2	3	3	17	51	3	3	4	3	5	5	23	97
438	0	1997-11-10	2017-06-08	19.5756	1010	1	3	0	0	1	5	-9	1	5	2	2	1	5	2	9	2	3	5	5	1	2	3	1	3	3	2	30	3	1	3	1	2	3	13	43	5	4	2	5	4	3	23	75
439	0	1997-12-26	2017-06-08	19.4497	1010	1	3	0	0	1	4	3	1	5	3	3	2	3	3	23	3	3	3	2	2	4	3	2	4	4	3	33	3	2	3	1	2	2	13	46	3	2	3	4	3	3	18	87
440	0	1997-12-21	2017-06-08	19.4634	1010	1	3	0	0	1	3	4	2	4	4	2	3	4	1	24	1	3	3	3	5	5	3	2	2	3	5	35	3	1	2	1	2	3	12	47	4	2	2	5	5	5	23	94
441	0	1994-04-27	2017-06-08	23.1157	1010	1	3	0	0	1	3	3	2	4	2	3	3	3	1	21	3	1	3	2	2	3	3	3	2	2	2	26	1	1	2	1	2	3	10	36	5	1	2	4	3	4	19	76
442	0	1995-10-28	2017-06-08	21.6126	1010	1	3	0	0	1	5	5	2	5	4	2	3	5	2	28	3	3	4	3	3	4	1	1	4	5	4	35	3	1	3	2	1	3	13	48	3	2	4	2	4	3	18	94
443	0	1997-06-10	2017-06-08	19.9945	1010	1	3	0	0	1	5	4	3	5	3	3	3	2	5	28	3	5	2	2	5	4	2	5	4	4	5	41	3	2	2	1	3	4	15	56	4	4	4	2	5	5	24	108
444	0	1996-10-21	2017-06-08	20.6297	1010	1	3	1	0	1	5	5	3	5	3	4	1	5	1	27	4	4	4	1	1	5	5	1	3	5	4	37	5	5	5	4	3	5	27	64	4	1	5	1	3	5	19	110
445	0	1996-07-15	2017-06-08	20.898	1010	1	3	0	0	1	4	4	3	4	4	5	3	5	2	30	2	3	3	1	5	5	1	1	3	3	4	31	3	2	3	2	3	3	16	47	3	2	3	4	5	2	19	96
447	0	1997-04-09	2017-06-08	20.1643	1010	1	3	0	0	1	4	4	2	5	4	3	1	3	2	24	4	4	4	3	3	5	3	2	3	2	3	36	2	1	2	1	1	3	10	46	4	3	2	3	4	4	20	90
449	0	1997-05-25	2017-06-08	20.0383	1010	1	3	0	0	1	4	5	3	4	5	3	3	5	1	29	3	4	4	1	1	3	2	1	4	5	5	33	4	4	5	3	3	2	21	54	5	2	3	3	3	4	20	103
450	0	1997-10-17	2017-06-08	19.6413	1010	1	3	0	0	1	5	5	5	5	5	4	3	5	4	36	4	5	3	3	4	5	4	4	4	4	4	44	4	4	5	5	2	4	24	68	3	2	4	2	3	3	17	121
451	0	1998-04-07	2017-06-08	19.1704	1010	1	3	1	1	1	2	3	3	3	3	3	4	3	3	25	2	5	3	1	5	5	3	1	1	2	5	33	1	2	3	2	2	2	12	45	3	4	2	5	5	1	20	90
452	0	1997-05-31	2017-06-08	20.0219	1010	1	3	0	0	1	5	5	2	3	2	3	3	3	3	24	3	4	3	2	5	3	3	1	5	4	3	36	4	2	4	2	3	3	18	54	2	3	5	2	5	5	22	100
453	0	1997-07-29	2017-06-08	19.8604	1010	1	3	0	0	1	5	4	3	4	4	3	3	3	3	27	5	5	4	5	4	5	5	4	5	4	5	51	5	3	2	2	3	3	18	69	4	2	3	4	3	4	20	116
454	0	1997-08-04	2017-06-08	19.8439	1010	1	3	0	0	1	4	3	1	5	3	3	1	2	1	19	2	3	3	1	4	5	5	1	4	3	5	36	3	3	3	1	2	3	15	51	2	1	3	3	5	3	17	87
455	0	1997-07-14	2017-06-08	19.9014	1010	1	3	0	0	1	5	5	4	4	4	3	3	4	4	31	5	5	4	4	5	5	5	3	5	5	4	50	5	4	5	3	3	3	23	73	3	1	3	3	3	4	17	121
456	0	1997-05-10	2017-06-08	20.0794	1010	1	3	0	0	1	4	5	3	5	4	5	3	5	4	34	4	3	3	2	1	4	3	2	4	3	4	33	4	2	2	2	3	2	15	48	4	2	2	3	2	1	14	96
457	0	1997-05-16	2017-06-08	20.063	1010	1	3	0	0	1	4	4	1	3	2	3	2	2	3	20	1	3	3	3	3	4	3	1	3	3	2	29	3	1	3	2	1	3	13	42	4	1	3	4	4	3	19	81
458	0	1996-07-08	2017-06-08	20.9172	1010	1	3			1	5	4	3	5	5	4	3	4	3	31	3	3	4	2	4	4	4	4	4	4	4	40	3	4	4	3	2	3	19	59	3	2	3	2	3	3	16	106
460	0	1997-01-30	2017-06-14	20.3696	1010	1	5	1	0	1	5	4	4	4	3	2	3	4	2	26	4	4	3	3	3	4	4	2	4	4	4	39	4	2	3	1	1	4	15	54	4	2	4	4	3	4	21	101
461	0	1997-03-14	2017-06-14	20.2519	1010	1	5	0	0	1	5	4	3	5	5	2	5	5	3	32	3	5	5	2	3	5	5	2	5	5	5	45	2	4	3	3	4	5	21	66	5	5	3	2	3	4	22	120
462	0	1996-05-15	2017-06-14	21.0815	1010	1	5	0	0	1	4	5	4	5	3	2	3	5	1	28	3	5	3	2	4	5	5	2	5	2	4	40	2	2	2	2	3	3	14	54	5	4	5	4	5	4	27	109
463	0	1994-07-06	2017-06-14	22.9405	1010	1	5	0	0	1	4	4	3	4	3	4	3	5	5	31	4	4	4	4	4	4	3	5	5	5	5	47	4	4	4	2	4	3	21	68	2	3	3	3	1	2	14	113
464	0	1994-08-26	2017-06-14	22.8008	1010	1	5	0	0	1	4	5	2	4	3	5	5	4	3	31	4	4	5	3	1	5	3	1	5	5	3	39	3	3	3	3	5	4	21	60	5	2	3	3	5	2	20	111
465	0	1997-05-23	2017-06-14	20.0602	1010	1	5	1	0	1	5	4	4	5	5	5	2	4	2	31	5	5	2	5	2	5	5	5	5	5	4	48	5	3	5	3	4	3	23	71	4	4	3	4	5	3	23	125
466	0	1997-08-20	2017-06-14	19.8166	1010	1	5	0	0	1	5	4	2	4	3	3	3	4	4	27	5	3	4	4	5	5	4	5	5	2	5	47	3	2	3	3	3	3	17	64	5	2	4	4	5	3	23	114
467	0	1993-08-25	2017-06-14	23.8029	1010	1	5	0	0	1	4	4	3	5	3	3	4	4	3	29	3	4	3	4	2	4	3	3	3	3	2	34	3	3	3	3	2	4	18	52	4	3	3	3	3	4	20	101
468	0	1993-03-24	2017-06-14	24.2245	1010	1	5	0	0	1	4	5	1	3	3	3	3	4	2	24	2	3	2	3	2	3	3	1	4	3	3	29	2	3	3	2	3	3	16	45	3	2	3	3	3	3	17	86
469	0	1993-07-24	2017-06-14	23.8905	1010	1	5	0	0	1	5	5	5	5	5	4	4	5	4	37	5	4	4	5	2	5	2	2	4	5	5	43	4	2	3	3	5	4	21	64	4	2	3	2	4	4	19	120
470	0	1994-03-24	2017-06-14	23.2252	1010	1	5	0	0	1	4	4	1	4	4	4	3	4	2	26	3	3	3	1	2	4	3	2	3	2	2	28	1	1	1	1	1	1	6	34	3	1	3	1	3	4	15	75
471	0	1994-06-24	2017-06-14	22.9733	1010	1	5	0	0	1	5	5	5	5	5	3	4	4	3	34	3	4	3	5	4	4	3	3	4	3	3	39	3	3	4	3	2	2	17	56	3	2	3	2	2	4	16	106
472	0	1995-10-25	2017-06-14	21.6372	1010	1	5	0	0	1	5	5	3	4	4	3	3	4	1	27	3	5	3	2	2	4	2	1	4	4	4	34	4	2	2	3	2	4	17	51	3	2	5	4	3	4	21	99
473	0	1996-02-12	2017-06-14	21.3361	1010	1	5	0	0	1	5	3	3	5	3	2	3	3	3	25	3	4	3	3	2	4	4	3	3	4	4	37	4	2	1	1	3	4	15	52	3	2	2	2	3	1	13	90
474	0	1995-09-02	2017-06-14	21.7823	1010	1	5	0	0	1	5	3	1	3	3	2	3	1	4	20	3	3	3	2	1	3	3	1	3	2	2	26	2	1	2	2	1	2	10	36	3	1	2	5	4	4	19	75
475	0	1997-06-19	2017-06-14	19.9863	1010	1	5	0	0	1	4	5	2	5	4	5	3	5	3	32	4	4	5	4	4	4	3	2	4	4	4	42	4	3	3	2	3	4	19	61	3	1	2	2	5	2	15	108
476	0	1995-01-23	2017-06-14	22.3901	1010	1	5	1	0	1	4	5	3	5	3	1	5	3	3	28	3	3	1	4	5	5	2	2	4	5	4	38	2	2	1	2	1	4	12	50	2	4	5	2	5	4	22	100
477	0	1996-10-01	2017-06-14	20.7009	1010	1	5	0	0	1	4	4	2	5	5	5	3	4	4	32	3	3	3	3	2	4	5	3	3	4	4	37	3	4	3	1	5	5	21	58	2	1	5	3	5	5	21	111
478	0	1997-02-06	2017-06-14	20.3504	1010	1	5	0	0	1	4	4	1	4	1	2	3	4	2	21	3	5	3	4	5	5	3	4	4	5	5	46	4	1	1	2	1	3	12	58	4	2	4	5	3	4	22	101
480	0	1996-12-17	2017-06-14	20.4901	1010	1	5	0	0	1	-9	4	4	5	3	5	3	5	4	33	3	5	3	4	4	4	4	2	4	3	5	41	4	4	4	2	3	3	20	61	4	3	3	3	4	4	21	115
481	0	1997-03-20	2017-06-14	20.2355	1010	1	5	0	0	1	3	5	4	4	4	4	4	5	2	32	3	5	2	3	3	2	5	1	4	4	5	37	2	3	4	3	2	4	18	55	4	2	4	4	5	4	23	110
482	0	1996-11-17	2017-06-14	20.5722	1010	1	5	0	0	1	3	5	2	5	4	3	1	3	2	25	2	2	3	2	4	4	2	5	2	3	1	30	3	1	1	1	1	1	8	38	4	3	5	4	5	5	26	89
483	0	1996-01-24	2017-06-14	21.3881	1010	1	5	1	1	1	4	5	2	4	2	2	4	5	3	27	4	4	4	1	2	4	4	2	4	4	3	36	4	4	3	3	3	3	20	56	2	2	3	1	3	5	16	99
484	0	1995-05-19	2017-06-14	22.0726	1010	1	5	0	0	1	5	5	3	5	5	5	4	5	3	35	1	4	3	3	1	5	5	1	2	3	1	29	2	1	1	1	1	2	8	37	4	3	4	3	3	1	18	90
485	0	1997-04-08	2017-06-14	20.1834	1010	1	5	0	0	1	4	4	3	4	5	3	3	4	3	29	2	4	4	3	3	4	3	2	3	3	3	34	2	3	2	2	2	3	14	48	4	4	4	4	4	3	23	100
486	0	1997-02-19	2017-06-14	20.3149	1010	1	5	0	0	1	3	4	3	4	5	3	4	4	3	30	1	3	1	1	1	5	1	3	3	4	1	24	4	5	2	2	1	3	17	41	3	1	4	4	5	5	22	93
487	0	1996-12-11	2017-06-14	20.5065	1010	1	5	0	0	1	5	5	4	5	3	3	4	4	3	31	3	2	3	3	3	3	3	2	4	4	3	33	3	3	3	2	2	3	16	49	5	3	4	4	3	4	23	103
488	0	1996-11-14	2017-06-14	20.5804	1010	1	5	1	0	1	4	4	3	5	4	4	4	3	4	31	4	4	4	2	4	4	4	2	4	4	4	40	4	3	3	2	2	4	18	58	4	2	4	3	3	3	19	108
489	0	1996-04-27	2017-06-14	21.1307	1010	1	5	0	0	1	5	5	2	5	5	5	2	4	5	33	4	5	5	5	5	5	5	1	3	3	3	44	3	3	2	2	3	2	15	59	5	5	3	5	5	5	28	120
490	0	1992-09-24	2017-06-14	24.7201	1010	1	5	0	0	1	5	5	3	4	3	2	2	3	2	24	5	4	4	3	4	3	4	3	4	5	4	43	4	2	3	1	1	2	13	56	5	2	2	3	2	2	16	96
491	0	1993-08-30	2017-06-14	23.7892	1010	1	5	0	0	1	4	4	3	4	4	3	2	3	2	25	3	2	2	3	2	2	2	1	3	3	2	25	3	1	1	1	2	2	10	35	3	2	4	3	3	5	20	80
492	0	1996-03-03	2017-06-14	21.2813	1010	1	5	0	0	1	3	4	3	4	3	4	2	4	3	27	3	3	3	4	5	4	2	4	3	3	4	38	3	2	2	2	1	3	13	51	2	2	4	3	3	4	18	96
493	0	1997-04-14	2017-06-14	20.167	1010	1	5	0	0	1	5	4	2	4	4	5	2	5	1	27	4	5	3	4	5	5	3	5	5	5	3	47	5	5	5	2	2	3	22	69	3	4	4	4	5	5	25	121
494	0	1996-05-14	2017-06-14	21.0842	1010	1	5	0	0	1	4	4	2	3	3	2	3	4	2	23	2	3	2	3	3	4	2	1	3	1	3	27	1	2	3	2	1	2	11	38	5	4	4	5	4	4	26	87
495	0	1997-06-15	2017-06-14	19.9973	1010	1	5	0	0	1	3	5	4	5	5	3	3	4	3	32	3	4	5	3	2	5	3	2	3	2	2	34	3	2	2	4	3	2	16	50	3	3	2	2	2	3	15	97
496	0	1995-11-15	2017-06-14	21.5797	1010	1	5	0	0	1	2	4	3	4	2	3	2	3	3	24	2	3	4	2	1	3	3	1	3	2	3	27	2	3	2	1	1	2	11	38	2	2	3	2	3	4	16	78
571	0	1994-09-23	2017-11-09	23.1294	1004	1	4	0	0	1	3	3	2	4	2	2	4	3	2	22	1	2	2	2	4	3	3	1	3	2	2	25	1	2	1	3	2	2	11	36	4	2	4	3	4	4	21	79
574	0	1996-09-21	2017-11-09	21.1335	1004	1	4	0	0	1	4	3	4	4	4	4	3	4	2	28	3	1	3	1	5	4	1	2	5	4	1	30	4	4	1	2	3	5	19	49	2	1	5	3	4	1	16	93
575	0	1995-12-20	2017-11-09	21.8891	1004	1	4	0	0	1	3	3	3	3	3	2	4	3	2	23	3	3	3	4	3	3	3	1	3	3	4	33	2	1	4	2	1	3	13	46	5	2	4	4	4	4	23	92
576	0	1997-10-31	2017-11-09	20.0246	1004	1	4	0	0	1	5	5	5	5	5	3	3	5	4	35	3	4	4	2	3	4	3	2	4	3	4	36	4	4	4	3	3	5	23	59	5	2	5	2	4	2	20	114
577	0	1991-08-16	2017-11-15	26.2505	1004	1	6	0	0	1	5	5	3	5	5	5	4	5	5	37	5	5	3	3	5	5	5	2	4	5	5	47	5	3	5	2	2	4	21	68	2	1	3	3	3	5	17	122
580	0	1993-11-30	2017-11-15	23.9589	1004	1	8	0	0	1	4	3	2	3	3	2	2	4	2	21	3	4	4	3	1	5	3	3	2	3	3	34	4	2	2	1	2	4	15	49	2	2	4	4	3	4	19	89
581	0	1996-07-07	2017-11-15	21.358	1004	1	6	0	0	1	4	4	1	5	5	3	3	5	1	27	5	4	3	4	3	3	5	5	5	5	5	47	4	2	4	3	4	5	22	69	3	3	3	3	3	4	19	115
582	0	1996-09-01	2017-11-15	21.2047	1004	1	6	0	0	1	4	3	4	4	3	3	5	5	3	30	2	3	3	3	4	4	1	4	4	4	4	36	4	4	4	1	4	2	19	55	3	2	3	3	4	5	20	105
583	0	1991-04-03	2017-11-15	26.6201	1004	1	8	0	0	1	5	3	3	2	2	2	1	4	2	19	3	4	4	1	2	4	5	3	2	3	1	32	2	3	3	2	3	3	16	48	4	2	2	2	3	2	15	82
584	0	1991-10-16	2017-11-15	26.0835	1004	1	4	0	0	1	3	3	3	3	3	3	3	4	1	23	3	3	2	3	2	4	4	1	3	3	3	31	3	3	3	3	4	3	19	50	5	4	3	3	5	4	24	97
585	0	1996-02-23	2017-11-15	21.7276	1004	1	6	0	0	1	4	3	2	2	3	3	4	4	3	24	5	5	4	5	4	5	5	2	2	2	5	44	3	5	5	2	3	2	20	64	4	5	3	5	5	4	26	114
587	0	1997-07-14	2017-11-15	20.3395	1004	1	6	0	0	1	4	4	3	-9	4	2	5	3	2	14	3	3	3	3	4	5	4	1	3	3	4	36	3	2	3	2	2	3	15	51	3	1	2	3	4	1	14	79
588	0	1995-04-25	2017-11-15	22.5599	1004	1	6	0	0	1	5	4	2	4	3	1	2	5	1	22	3	4	4	3	1	5	4	2	4	4	4	38	5	3	2	4	5	5	24	62	4	2	2	2	3	4	17	101
591	0	1994-08-09	2017-11-15	23.269	1004	1	6	0	0	1	5	5	3	5	4	3	4	5	4	33	4	5	5	5	5	4	4	2	4	5	5	48	4	4	5	3	3	5	24	72	3	2	3	3	3	5	19	124
592	0	1994-09-17	2017-11-15	23.1622	1004	1	6	1	0	1	5	5	2	4	4	3	3	5	3	29	3	4	2	4	5	4	3	5	4	5	4	43	4	2	2	1	3	4	16	59	4	3	3	4	2	4	20	108
593	0	1994-06-03	2017-11-15	23.4524	1004	1	6	0	0	1	5	5	3	4	5	2	3	4	3	29	4	4	4	2	5	4	1	4	4	5	5	42	4	3	4	2	3	3	19	61	3	2	4	5	5	5	24	114
594	0	1993-08-23	2017-11-15	24.23	1004	1	6	0	0	1	5	5	3	4	3	5	3	5	4	32	5	5	5	3	3	5	5	2	5	5	5	48	5	4	5	5	5	5	29	77	4	1	3	5	3	1	17	126
596	0	1998-02-21	2017-06-08	19.2936	2001	2	3	0	0	1	4	3	4	5	4	4	4	5	3	32	3	5	4	4	5	5	3	2	2	2	3	38	3	1	1	1	1	2	9	47	3	1	2	1	1	3	11	90
597	0	1997-01-18	2017-06-08	20.386	2001	2	3	0	0	1	5	3	2	4	3	3	4	3	1	23	3	5	3	3	4	4	3	4	3	3	5	40	2	2	2	3	2	3	14	54	3	2	4	4	2	4	19	96
598	0	1995-10-07	2017-06-08	21.6701	2001	2	3	0	0	1	4	5	2	4	4	2	1	5	2	25	3	5	4	4	1	5	3	1	3	4	3	36	2	2	1	1	1	3	10	46	5	3	5	5	5	5	28	99
599	0	1984-08-24	2017-06-08	32.7885	2001	2	3	0	0	1	4	4	3	4	3	3	2	4	3	26	4	4	4	4	4	4	4	4	4	4	4	44	4	4	4	4	3	4	23	67	5	3	2	4	5	5	24	117
600	0	1984-02-18	2017-06-08	33.3032	2001	2	3	0	0	1	4	1	1	3	3	3	3	2	4	20	3	2	2	1	1	2	1	1	2	1	2	18	1	1	2	1	1	3	9	27	4	5	4	4	2	5	24	71
601	0	1998-04-16	2017-06-08	19.1458	2001	2	3	0	0	1	4	3	2	5	5	4	2	4	2	27	3	4	4	4	2	4	2	1	3	3	2	32	3	1	1	2	1	2	10	42	4	2	3	3	3	3	18	87
602	0	1997-05-13	2017-06-08	20.0712	2001	2	3	0	0	1	1	3	2	3	4	4	3	3	2	24	1	3	4	1	5	5	3	1	2	2	4	31	1	3	2	1	2	4	13	44	2	3	1	3	3	3	15	83
603	0	1996-01-09	2017-06-08	21.4127	2001	2	3	0	0	1	3	3	3	3	3	3	2	4	2	23	3	5	3	2	2	5	2	2	3	3	3	33	2	3	3	3	2	4	17	50	2	2	2	1	4	5	16	89
605	0	1998-05-21	2017-06-08	19.05	2001	2	3	0	0	1	5	5	1	5	5	5	2	5	2	30	3	5	2	2	4	5	1	1	2	5	5	35	1	1	1	2	1	3	9	44	4	1	5	1	1	4	16	90
606	0	1997-01-16	2017-06-08	20.3915	2001	2	3	0	0	1	3	3	2	3	3	4	3	3	4	25	1	1	2	1	4	3	1	1	2	3	3	22	1	1	1	1	2	2	8	30	3	2	2	4	3	4	18	73
607	0	1995-05-11	2017-06-08	22.078	2001	2	3	0	0	1	5	4	2	5	4	4	1	3	3	26	2	3	1	3	3	4	4	1	3	3	3	30	3	3	3	2	3	3	17	47	5	4	3	4	5	3	24	97
608	0	1995-08-31	2017-06-08	21.7714	2001	2	3	0	0	1	4	5	3	4	4	4	5	4	3	32	5	5	5	5	5	5	5	2	3	2	4	46	2	2	2	2	2	3	13	59	3	1	2	3	2	3	14	105
609	0	1998-04-09	2017-06-08	19.165	2001	2	3	0	0	1	5	3	3	5	3	3	2	3	2	24	3	3	3	3	5	4	4	5	3	3	5	41	3	3	3	3	2	3	17	58	3	2	3	3	3	4	18	100
610	0	1997-11-03	2017-06-08	19.5948	2001	2	3	0	0	1	4	4	3	5	3	5	4	5	2	31	1	4	2	1	3	5	4	1	1	1	5	28	2	2	1	2	2	3	12	40	3	2	3	4	1	3	16	87
611	0	1997-01-29	2017-09-07	20.6051	2001	2	6	1	0	0	4	3	2	3	2	2	5	5	1	23	2	1	3	3	3	3	4	2	2	4	5	32	4	1	5	2	2	1	15	47	3	1	4	3	5	5	21	91
612	0	1995-11-21	2017-09-07	21.796	2001	2	8	0	0	1	4	5	4	5	5	5	3	4	4	35	3	1	3	2	3	5	2	3	2	1	2	27	1	1	2	2	2	1	9	36	3	1	2	4	3	3	16	87
613	0	1998-04-27	2017-09-07	19.3648	2001	2	6	0	0	1	5	4	3	5	4	3	1	5	5	30	5	4	5	1	5	4	5	5	5	5	5	49	2	5	5	5	5	3	25	74	2	3	4	3	2	2	16	120
614	0	1996-10-20	2017-09-07	20.8816	2001	2	6	0	0	0	1	4	2	4	2	1	2	3	1	19	3	2	1	1	1	3	3	1	3	1	1	20	2	1	2	1	2	2	10	30	3	3	2	4	4	3	19	68
616	0	1995-11-02	2017-09-07	21.848	2001	2	6	1	0	1	5	5	3	5	3	5	4	4	3	32	4	5	5	5	5	5	5	5	4	5	3	51	4	3	2	1	3	3	16	67	5	3	3	5	4	5	25	124
617	0	1995-05-08	2017-09-07	22.3354	2001	2	8	0	0	1	5	5	2	4	3	3	5	4	3	29	1	5	3	2	1	5	5	1	5	5	5	38	5	5	4	4	2	4	24	62	5	1	5	3	3	3	20	111
618	0	1993-08-19	2017-09-07	24.052	2001	2	8	0	0	1	2	3	3	3	2	2	1	3	2	19	3	2	3	2	4	3	3	2	3	3	3	31	1	2	1	1	1	1	7	38	3	5	3	5	4	5	25	82
619	0	1995-12-18	2017-09-07	21.7221	2001	2	6	0	0	4	1	3	5	3	3	3	5	1	5	28	3	4	3	3	2	4	5	2	4	4	3	37	4	3	3	2	3	3	18	55	4	1	4	4	3	4	20	103
620	0	1993-12-04	2017-09-07	23.7591	2001	2	6	1	1	1	5	4	2	4	3	3	2	2	4	24	4	5	4	3	3	4	4	2	4	5	4	42	4	2	2	1	3	3	15	57	3	4	4	4	5	5	25	106
621	0	1996-06-23	2017-09-07	21.2074	2001	2	6	0	0	1	5	4	5	5	3	5	3	3	5	33	5	5	2	4	5	5	5	1	5	5	5	47	5	5	5	4	1	4	24	71	4	1	5	1	3	3	17	121
622	0	1996-08-24	2017-09-07	21.0376	2001	2	6	0	0	1	2	4	2	3	3	2	4	4	2	24	2	5	4	5	2	4	4	1	4	2	3	36	3	1	2	1	2	3	12	48	4	4	2	4	5	5	24	96
623	0	1993-02-09	2017-09-07	24.5749	2001	2	6	0	0	1	5	4	3	3	3	3	4	5	2	27	3	4	3	3	2	2	5	5	5	4	4	40	4	2	1	3	3	3	16	56	2	1	2	2	2	2	11	94
624	0	1992-06-07	2017-09-07	25.2512	2001	2	8	0	0	1	3	4	2	4	3	2	2	4	2	23	1	3	3	1	4	3	3	4	2	2	3	29	1	1	1	1	2	3	9	38	5	2	1	2	3	2	15	76
625	0	1995-09-05	2017-09-07	22.0068	2001	2	6	0	0	1	5	3	5	5	4	3	3	3	4	30	5	3	4	1	4	3	1	4	5	5	2	37	5	1	5	1	4	4	20	57	3	2	2	3	2	5	17	104
626	0	1996-11-23	2017-09-07	20.7885	2001	2	6	0	0	1	5	5	3	4	5	5	4	4	2	32	4	5	2	4	5	5	3	3	5	3	5	44	3	3	2	3	2	4	17	61	3	1	5	5	3	5	22	115
627	0	1996-06-11	2017-09-07	21.2402	2001	2	6	1	0	1	3	4	1	4	4	3	3	3	2	24	3	3	3	3	5	4	3	3	3	3	3	36	3	2	2	2	1	3	13	49	3	3	3	4	4	5	22	95
628	0	1994-10-05	2017-09-07	22.924	2001	2	6	0	0	1	3	3	3	3	3	4	5	3	3	27	4	3	4	4	5	4	5	2	3	3	4	41	3	2	2	2	2	2	13	54	3	3	3	4	1	4	18	99
629	0	1995-06-27	2017-09-07	22.1985	2001	2	6	0	0	1	4	4	3	4	4	3	3	5	1	27	2	4	5	4	5	4	5	5	4	5	5	48	5	5	5	4	4	5	28	76	3	1	3	4	1	3	15	118
630	0	1986-09-17	2017-09-07	30.9733	2001	2	6	0	0	1	5	5	5	5	5	4	5	5	5	39	3	3	5	5	5	2	5	3	2	5	4	42	5	1	2	2	1	4	15	57	4	4	4	5	3	3	23	119
633	0	1992-06-07	2017-09-08	25.2539	2002	2	6	0	0	1	3	3	3	4	2	2	4	3	2	23	4	2	3	2	3	1	1	1	3	3	4	27	2	1	2	1	2	3	11	38	3	4	4	2	3	2	18	79
637	0	1995-11-21	2017-09-08	21.7988	2002	2	6	0	0	1	3	3	3	2	3	2	2	3	2	20	3	3	2	3	4	5	4	5	3	3	5	40	3	2	2	1	1	2	11	51	4	1	1	1	3	3	13	84
641	0	1994-07-16	2017-09-08	23.1485	2002	2	8	0	0	1	3	5	5	3	3	2	4	2	1	25	3	3	3	4	4	4	5	2	4	3	5	40	2	3	2	3	3	2	15	55	5	2	2	5	3	4	21	101
643	0	1997-03-11	2017-09-08	20.4956	2002	2	6	0	0	1	5	5	3	4	4	3	3	4	2	28	3	3	3	4	2	3	4	2	5	5	5	39	3	2	3	1	2	3	14	53	5	1	1	5	5	3	20	101
645	0	1995-10-10	2017-09-08	21.9138	2002	2	8	1	0	1	4	3	3	4	4	5	2	5	3	29	5	4	5	3	5	5	4	2	5	4	1	43	3	2	3	1	2	3	14	57	5	1	2	5	5	4	22	108
647	0	1995-08-23	2017-09-08	22.0452	2002	2	8	0	0	1	3	4	3	4	3	3	1	3	3	24	3	2	4	1	2	2	4	1	3	3	4	29	3	2	3	2	1	2	13	42	4	4	1	4	2	2	17	83
648	0	1995-09-17	2017-09-08	21.9767	2002	2	8	0	0	1	3	4	4	4	3	3	4	4	2	28	4	4	3	1	2	5	4	3	3	4	4	37	3	1	2	2	3	4	15	52	2	2	3	3	3	4	17	97
656	0	1997-08-06	2017-09-08	20.0903	2002	2	4	0	0	1	3	4	3	4	2	2	3	3	1	22	3	4	4	5	5	5	5	1	4	3	1	40	3	2	3	4	3	4	19	59	3	2	3	2	4	4	18	99
657	0	1997-08-29	2017-09-08	20.0274	2002	2	4	0	0	1	4	2	2	3	3	2	3	3	1	19	3	1	1	1	3	1	1	2	4	5	1	23	2	2	1	1	1	2	9	32	5	1	3	1	4	5	19	70
663	0	1997-03-19	2017-09-08	20.4736	2002	2	4	0	0	1	3	4	3	5	3	3	3	2	3	26	2	3	5	2	3	2	1	1	3	4	4	30	2	1	1	2	1	3	10	40	3	3	2	3	4	2	17	83
664	0	1997-01-03	2017-09-08	20.679	2002	2	4	0	0	1	3	3	2	3	3	3	2	4	2	22	2	2	2	3	3	4	3	2	3	2	2	28	2	3	3	1	1	3	13	41	3	3	3	3	4	4	20	83
669	0	1997-07-02	2017-09-08	20.1862	2002	2	4	1	0	1	4	2	2	4	3	4	3	4	3	25	3	3	4	2	4	2	3	1	2	5	3	32	3	1	2	1	1	1	9	41	3	1	4	4	3	5	20	86
671	0	1997-09-03	2017-09-08	20.0137	2002	2	4	0	0	1	3	4	2	3	2	1	4	3	2	21	2	3	3	5	2	4	4	2	4	3	2	34	4	5	5	5	3	2	24	58	4	2	3	3	5	4	21	100
672	0	1995-03-01	2017-09-08	22.5243	2002	2	4	0	0	1	3	4	2	3	4	3	1	4	2	23	3	3	3	4	4	4	3	2	3	3	4	36	3	2	2	2	1	4	14	50	2	1	3	3	5	5	19	92
673	0	1997-11-26	2017-09-08	19.7837	2002	2	4	0	0	1	3	4	2	4	2	2	3	3	2	22	1	4	2	1	1	4	2	1	3	2	3	24	2	1	1	2	1	3	10	34	4	1	2	3	4	3	17	73
676	0	1996-07-01	2017-09-26	21.2375	2003	2	6	0	0	1	3	4	3	4	3	2	3	5	2	26	2	2	4	4	3	3	2	1	4	2	3	30	2	3	3	2	1	1	12	42	4	4	4	5	3	4	24	92
678	0	1995-07-19	2017-09-26	22.1903	2003	2	6	0	0	1	5	5	3	5	5	3	1	5	2	29	3	5	2	3	5	5	5	1	3	4	5	41	4	5	3	2	2	5	21	62	3	1	3	3	5	4	19	110
679	0	1994-11-23	2017-09-26	22.8419	2003	2	6	1	1	1	3	4	2	4	2	2	3	4	2	23	3	3	3	3	4	3	4	1	3	2	3	32	2	1	2	1	2	2	10	42	4	1	4	2	3	5	19	84
680	0	1995-12-24	2017-09-26	21.7577	2003	2	6	0	0	1	4	5	3	5	3	3	4	4	3	30	3	5	5	2	4	5	5	4	5	4	4	46	2	2	3	2	2	2	13	59	3	2	3	3	4	5	20	109
681	0	1997-01-05	2017-09-26	20.7228	2003	2	6	0	0	1	4	5	3	5	4	4	4	4	3	32	3	3	4	2	5	3	3	1	3	3	3	33	4	3	3	3	2	3	18	51	2	3	3	2	4	4	18	101
683	0	1997-01-14	2017-09-26	20.6982	2003	2	6	1	1	1	4	3	2	3	1	3	2	2	2	18	3	4	2	3	5	4	2	2	4	5	4	38	3	4	3	3	2	3	18	56	4	3	4	4	5	5	25	99
684	0	1996-06-13	2017-09-26	21.2868	2003	2	6	0	0	1	3	3	2	4	4	3	2	4	3	25	3	3	2	3	2	4	2	3	3	3	4	32	2	4	2	2	2	3	15	47	4	3	3	3	4	3	20	92
686	0	1996-03-25	2017-09-26	21.5058	2003	2	6	0	0	1	3	3	4	4	2	3	4	4	2	26	3	4	1	4	1	5	4	1	3	3	4	33	5	3	4	1	4	5	22	55	3	1	1	2	4	4	15	96
687	0	1996-09-14	2017-09-26	21.0322	2003	2	6	0	0	1	4	4	3	5	4	3	4	5	3	31	1	3	3	1	4	4	1	1	3	3	3	27	4	3	3	3	3	3	19	46	3	3	3	4	2	4	19	96
688	0	1997-01-22	2017-09-26	20.6762	2003	2	6	0	0	1	3	3	2	4	3	3	2	2	2	21	3	3	3	4	2	5	5	2	3	4	5	39	3	3	3	2	3	3	17	56	3	2	4	3	5	4	21	98
689	0	1997-01-21	2017-09-26	20.679	2003	2	6	0	0	1	3	3	2	4	3	2	1	1	1	17	3	2	4	2	5	3	1	1	2	1	2	26	1	1	2	2	1	3	10	36	3	4	3	5	3	5	23	76
690	0	1996-11-12	2017-09-26	20.8706	2003	2	6	0	0	1	4	5	3	5	5	5	4	5	3	35	2	5	3	2	1	5	5	1	4	3	5	36	2	4	3	2	1	3	15	51	4	2	2	3	3	4	18	104
691	0	1996-09-27	2017-09-26	20.9966	2003	2	6	0	0	1	3	4	3	3	3	1	2	3	1	20	1	3	3	3	1	3	3	1	3	3	4	28	2	1	2	1	1	2	9	37	3	3	4	4	4	4	22	79
692	0	1996-12-02	2017-09-26	20.8159	2003	2	6	0	0	1	4	4	2	4	3	2	2	4	3	24	2	4	2	3	3	4	2	3	3	2	4	32	1	3	3	2	2	3	14	46	4	3	4	4	4	5	24	94
693	0	1997-03-04	2017-09-26	20.564	2003	2	6	0	0	1	4	5	3	4	4	3	3	4	3	29	3	4	3	3	4	4	2	2	3	4	5	37	1	4	2	2	3	4	16	53	4	2	1	2	4	2	15	97
694	0	1996-06-17	2017-09-25	21.2731	2003	2	6	0	0	1	4	4	3	5	3	3	2	3	3	26	5	5	4	4	5	5	5	5	3	4	5	50	4	4	4	1	4	3	20	70	4	3	4	5	5	3	24	120
695	0	1997-09-10	2017-09-25	20.0411	2003	2	6	0	0	1	3	4	3	5	5	4	3	5	4	33	2	4	3	1	1	4	3	1	4	5	4	32	4	4	3	2	3	3	19	51	3	2	3	2	1	3	14	98
696	0	1995-09-25	2017-09-25	22.0014	2003	2	6	0	0	1	2	2	2	3	3	3	2	3	4	22	2	2	1	1	1	3	2	1	2	2	3	20	1	2	1	2	3	1	10	30	5	2	2	3	3	4	19	71
697	0	1996-01-03	2017-09-25	21.7276	2003	2	6	0	0	1	4	4	1	1	2	2	5	3	5	23	1	1	1	1	1	2	1	1	1	1	3	14	3	3	1	1	1	3	12	26	3	1	5	5	5	1	20	69
698	0	1996-09-13	2017-09-25	21.0322	2003	2	6	0	0	1	5	4	4	5	4	3	3	3	3	29	4	5	5	5	4	5	4	5	4	5	5	51	4	5	5	5	5	3	27	78	4	2	3	4	2	3	18	125
700	0	1997-01-09	2017-09-25	20.7091	2003	2	6	0	0	1	3	4	2	4	4	3	2	2	3	24	3	3	3	4	3	4	4	2	4	3	5	38	2	5	5	4	2	3	21	59	3	2	2	3	4	3	17	100
701	0	1996-04-23	2017-09-25	21.4237	2003	2	6	0	0	1	2	4	3	4	4	1	3	3	1	23	5	4	5	3	2	4	3	1	1	1	5	34	1	3	2	2	3	4	15	49	1	1	4	3	4	5	18	90
703	0	1996-07-11	2017-09-25	21.2074	2003	2	6	0	0	1	2	4	3	3	2	2	4	4	3	25	4	3	2	3	3	3	2	1	4	4	3	32	4	4	3	3	2	2	18	50	3	3	3	3	4	4	20	95
704	0	1996-11-29	2017-09-25	20.8214	2003	2	6	0	0	1	3	4	3	1	3	4	4	4	2	25	1	4	3	4	4	5	3	5	4	4	5	42	3	2	3	3	3	4	18	60	4	2	2	3	2	2	15	100
705	0	1995-10-11	2017-09-25	21.9576	2003	2	6	0	1	1	4	4	3	4	3	5	3	2	3	27	2	5	4	2	4	5	4	4	5	4	5	44	4	1	1	1	3	5	15	59	2	1	2	2	3	3	13	99
706	0	1996-09-08	2017-09-25	21.0459	2003	2	6	0	0	1	5	5	3	5	5	4	1	5	5	33	4	5	5	5	4	1	1	4	5	4	4	42	2	4	2	2	2	4	16	58	3	1	5	5	5	5	24	115
707	0	1995-06-16	2017-09-25	22.2779	2003	2	6	0	0	1	4	4	3	4	3	4	4	3	2	27	3	4	3	4	1	3	3	1	3	3	2	30	3	3	3	2	3	3	17	47	3	3	3	4	3	3	19	93
708	0	1996-07-12	2017-09-25	21.2047	2003	2	6	0	0	1	5	5	2	5	5	3	4	5	1	30	3	5	2	2	5	5	1	5	5	3	4	40	2	3	3	2	2	4	16	56	5	2	4	4	4	4	23	109
709	0	1997-04-07	2017-09-25	20.4682	2003	2	6	0	0	1	4	4	3	3	2	3	2	5	2	24	3	5	5	4	5	4	3	2	3	4	4	42	4	3	2	3	3	5	20	62	3	3	2	2	5	4	19	105
710	0	1995-09-30	2017-09-25	21.9877	2003	2	6	0	0	1	3	4	3	4	5	3	2	5	2	28	5	5	4	4	3	5	3	1	4	4	4	42	4	1	3	1	3	5	17	59	4	2	1	3	4	4	18	105
711	0	1995-05-24	2017-09-25	22.3409	2003	2	6	0	0	1	4	4	3	3	3	3	3	3	2	24	4	3	3	3	4	4	4	1	4	3	3	36	3	3	3	2	2	3	16	52	3	2	3	4	3	3	18	94
712	0	1995-08-02	2017-09-25	22.1492	2003	2	6	0	0	1	4	4	3	4	3	3	3	4	3	27	2	4	1	3	1	3	4	1	4	3	4	30	4	5	2	1	1	3	16	46	3	4	3	3	4	4	21	94
713	0	1996-04-16	2017-09-25	21.4428	2003	2	6	0	0	1	5	5	2	5	5	2	2	4	2	27	3	4	4	4	4	5	5	1	4	4	5	43	4	3	3	3	2	4	19	62	3	1	5	2	5	5	21	110
714	0	1996-01-16	2017-09-25	21.692	2003	2	6	0	0	1	5	4	4	3	3	3	3	4	2	26	3	3	4	4	3	5	4	1	2	3	4	36	2	3	2	1	3	3	14	50	5	4	4	2	4	5	24	100
715	0	1994-11-22	2017-09-25	22.8419	2003	2	5	1	0	1	4	4	3	5	4	2	4	4	3	29	4	3	4	3	5	5	2	3	4	4	3	40	4	4	4	4	5	5	26	66	3	1	2	2	4	3	15	110
716	0	1992-06-17	2017-09-25	25.2731	2003	2	6	0	0	1	4	3	1	5	3	3	1	4	1	21	4	4	3	5	2	4	2	1	4	3	3	35	2	3	3	2	1	3	14	49	4	2	2	3	3	4	18	88
717	0	1995-11-27	2017-09-25	21.8289	2003	2	6	0	0	1	4	3	3	3	3	4	4	5	5	30	3	4	3	2	3	5	4	3	3	3	4	37	3	2	1	1	2	3	12	49	1	1	3	3	5	5	18	97
718	0	1994-01-24	2017-09-25	23.6687	2003	2	6	1	1	1	5	5	3	5	5	5	5	5	4	37	5	5	5	4	5	5	3	3	4	5	5	49	5	3	4	3	3	4	22	71	4	2	3	3	4	4	20	128
719	0	1994-11-29	2017-09-25	22.8227	2003	2	6	0	0	1	4	4	5	3	3	3	1	5	2	26	3	2	3	4	1	2	2	1	3	3	2	26	3	4	4	2	3	4	20	46	4	3	4	5	3	4	23	95
720	0	1995-07-24	2017-09-25	22.1739	2003	2	5	0	0	1	4	4	3	4	4	3	3	4	1	26	4	3	2	3	3	4	3	3	5	5	4	39	2	2	3	2	2	3	14	53	4	4	3	4	4	3	22	101
721	0	1995-07-01	2017-09-25	22.2368	2003	2	6	0	0	1	3	3	2	3	3	3	2	3	3	22	4	4	4	2	5	5	4	3	3	3	4	41	3	3	3	1	3	3	16	57	1	2	1	4	5	3	16	95
722	0	1994-09-06	2017-09-25	23.0527	2003	2	6	0	0	1	5	5	3	5	4	3	4	3	1	28	5	5	5	4	5	3	4	3	3	4	4	45	3	5	5	3	4	3	23	68	4	4	4	4	4	3	23	119
724	0	1996-07-08	2017-09-25	21.2156	2003	2	6	0	0	1	4	3	2	5	4	3	1	3	2	23	2	2	4	3	4	5	1	1	4	3	5	34	5	1	4	4	5	4	23	57	1	2	5	2	3	5	18	98
727	0	1996-11-17	2017-09-25	20.8542	2003	2	6	0	1	0	1	4	3	4	4	4	2	4	4	29	2	4	3	4	4	2	4	4	3	4	3	37	3	2	3	2	3	3	16	53	4	2	2	3	4	2	17	99
729	0	1996-02-05	2017-09-25	21.6372	2003	2	6	0	0	1	5	5	2	5	5	4	1	5	3	30	4	4	4	4	5	5	5	5	5	5	5	51	5	2	5	5	5	5	27	78	5	5	5	5	5	5	30	138
730	0	1996-12-20	2017-09-25	20.7639	2003	2	6	0	0	1	4	4	4	4	4	4	4	4	4	32	2	5	4	4	4	5	2	1	4	4	5	40	3	4	2	2	2	5	18	58	2	2	2	2	1	3	12	102
731	0	1996-12-23	2017-09-25	20.7556	2003	2	6	0	0	1	4	1	1	3	1	1	1	1	1	10	1	1	4	1	5	2	3	5	4	4	2	32	1	1	1	4	3	1	11	43	1	1	2	5	1	1	11	64
732	0	1997-02-06	2017-09-25	20.6324	2003	2	6	0	0	1	4	3	2	4	4	3	5	5	3	29	3	1	3	2	3	3	2	1	3	3	4	28	2	3	2	2	1	4	14	42	3	4	4	5	5	5	26	97
733	0	1996-03-28	2017-09-25	21.4949	2003	2	6	0	0	1	2	4	1	5	4	3	4	3	2	26	4	3	1	3	1	3	4	1	5	5	1	31	4	2	1	1	1	5	14	45	4	1	4	1	3	5	18	89
734	0	1995-08-30	2017-09-25	22.0726	2003	2	6	0	0	1	5	4	2	5	2	1	3	4	2	23	3	4	3	1	3	4	4	2	3	4	1	32	4	3	3	3	2	3	18	50	3	2	3	3	4	3	18	91
735	0	1996-08-07	2017-09-25	21.1335	2003	2	6	1	1	1	5	5	1	4	3	4	4	4	5	30	4	5	3	3	5	4	4	1	5	5	5	44	5	3	5	3	4	4	24	68	2	2	4	2	4	4	18	116
736	0	1996-07-18	2017-09-25	21.1882	2003	2	6	0	0	1	4	5	3	4	4	2	3	3	2	26	5	5	4	5	5	4	4	4	5	4	5	50	5	5	5	4	4	5	28	78	4	2	2	1	3	2	14	118
737	0	1996-03-16	2017-09-25	21.5277	2003	2	6	0	0	1	5	5	2	4	4	3	2	3	2	25	2	4	4	4	4	4	2	2	4	4	4	38	4	4	4	4	3	4	23	61	4	3	4	4	4	4	23	109
740	0	1996-10-14	2017-09-25	20.9473	2003	2	6	0	0	1	4	5	3	4	3	3	2	4	2	26	2	3	2	2	4	3	2	3	4	3	4	32	3	2	4	2	1	2	14	46	3	2	5	3	3	3	19	91
741	0	1996-08-14	2017-09-25	21.1143	2003	2	6	0	0	1	5	5	2	5	4	5	1	5	3	30	5	4	5	2	2	5	4	3	3	3	5	41	5	5	5	3	4	5	27	68	4	5	2	4	3	3	21	119
742	0	1996-10-26	2017-09-25	20.9144	2003	2	6	0	0	1	5	4	2	4	4	4	3	3	2	26	3	3	4	2	2	3	2	1	4	3	3	30	3	3	4	1	1	2	14	44	4	3	3	3	3	4	20	90
743	0	1996-09-01	2017-09-25	21.065	2003	2	6	0	0	1	4	3	2	3	2	4	4	2	3	23	2	1	3	2	3	2	5	1	2	3	1	25	3	3	3	1	2	2	14	39	4	2	2	4	5	4	21	83
745	0	1997-03-08	2017-09-25	20.5503	2003	2	6	0	0	1	5	5	2	4	4	3	2	5	3	28	5	5	3	3	1	5	3	1	4	4	5	39	4	1	4	2	2	3	16	55	2	2	3	3	3	3	16	99
746	0	1996-04-23	2017-09-25	21.4237	2003	2	6	0	0	1	4	4	2	4	3	1	2	4	1	21	1	2	2	1	1	3	1	1	3	5	4	24	1	2	4	1	1	3	12	36	5	5	2	4	4	5	25	82
748	0	1997-06-17	2017-09-25	20.2738	2003	2	6	0	0	1	4	3	2	4	3	4	1	5	1	23	1	4	3	5	4	5	1	1	3	3	3	33	2	1	1	1	1	1	7	40	5	1	4	5	5	3	23	86
749	0	1993-07-05	2017-09-25	24.2245	2003	2	6	0	0	1	4	4	2	4	4	3	4	3	2	26	4	3	3	2	3	2	4	1	2	3	4	31	3	2	3	3	2	3	16	47	3	3	3	3	5	4	21	94
750	0	1996-11-20	2017-09-25	20.846	2003	2	6	0	0	1	4	4	2	3	2	3	2	3	1	20	3	3	2	2	1	3	2	1	2	2	3	24	2	1	2	2	2	3	12	36	2	1	2	3	2	2	12	68
752	0	1995-12-01	2017-09-25	21.8179	2003	2	6	0	0	1	4	4	2	4	4	3	3	3	2	25	2	3	2	3	1	4	1	1	3	3	3	26	2	2	2	2	2	1	11	37	3	2	3	3	5	3	19	81
753	0	1995-07-06	2017-09-25	22.2231	2003	2	6	0	0	1	4	3	3	4	3	3	4	5	2	27	3	3	4	3	2	3	2	2	4	3	3	32	2	2	3	2	3	3	15	47	2	2	3	4	3	4	18	92
754	0	1995-07-05	2017-09-25	22.2259	2003	2	6	0	0	1	5	4	2	3	3	2	1	4	3	22	3	3	4	2	3	4	5	2	3	3	4	36	4	2	3	1	1	3	14	50	5	4	4	3	5	5	26	98
755	0	1995-06-27	2017-09-25	22.2478	2003	2	6	0	0	1	4	4	3	5	4	3	2	3	3	27	3	4	3	3	3	3	4	1	4	3	4	35	3	3	3	2	1	3	15	50	4	2	5	3	3	5	22	99
757	0	1992-12-21	2017-10-02	24.7803	2004	2	6	0	0	1	3	3	2	3	3	2	2	2	1	18	3	3	3	2	4	3	2	1	2	2	3	28	3	2	2	2	1	3	13	41	3	2	3	3	3	4	18	77
759	0	1997-02-01	2017-10-02	20.6653	2004	2	4	0	1	4	3	3	4	4	4	2	3	2	2	24	4	3	4	3	5	4	3	2	4	4	4	40	3	3	4	3	3	3	19	59	4	1	2	3	2	2	14	97
760	0	1995-07-06	2017-10-02	22.2423	2004	2	6	0	0	1	3	3	1	3	3	3	2	3	3	21	1	2	2	2	1	1	1	1	3	2	1	17	2	1	2	1	2	3	11	28	2	1	2	2	2	2	11	60
761	0	1994-05-20	2017-10-02	23.3703	2004	2	6	0	1	4	2	4	3	4	4	4	5	5	3	32	5	5	4	2	4	4	3	1	3	4	4	39	3	3	3	1	3	3	16	55	3	2	2	2	4	4	17	104
762	0	1994-11-08	2017-10-02	22.8994	2004	2	6	0	1	5	2	4	2	5	3	4	2	2	3	25	1	4	4	2	2	5	4	2	2	2	4	32	2	1	3	1	2	2	11	43	2	2	2	5	2	5	18	86
763	0	1997-09-02	2017-10-02	20.0821	2004	2	4	0	1	4	2	5	3	5	5	5	4	4	3	34	4	3	3	3	1	3	4	1	4	4	3	33	5	3	1	2	3	3	17	50	3	3	2	3	3	2	16	100
764	0	1994-09-02	2017-10-02	23.0828	2004	2	6	0	0	1	5	3	1	2	2	3	2	1	3	17	4	3	1	3	4	2	1	4	4	4	3	33	4	3	3	2	3	2	17	50	3	2	3	2	5	4	19	86
765	0	1996-12-27	2017-10-02	20.7639	2004	2	4	0	0	1	4	4	3	3	3	3	3	3	1	23	5	4	4	4	1	4	4	3	3	2	5	39	2	2	3	2	2	3	14	53	3	3	4	4	5	5	24	100
766	0	1994-12-10	2017-10-02	22.8118	2004	2	6	0	0	1	1	4	2	2	3	2	2	3	2	20	2	3	4	4	2	3	2	2	2	2	2	28	2	2	1	1	2	3	11	39	3	1	2	4	3	2	15	74
767	0	1997-05-17	2017-10-02	20.3778	2004	2	4	1	0	1	4	4	2	4	4	4	3	4	2	27	3	4	2	2	5	5	3	3	3	4	4	38	4	3	3	2	2	4	18	56	4	1	2	3	3	3	16	99
768	0	1996-09-22	2017-10-02	21.0267	2004	2	4	0	0	1	4	3	3	4	4	3	2	3	3	25	3	3	2	2	2	2	2	2	2	3	3	26	3	3	2	2	2	3	15	41	3	2	2	2	4	4	17	83
770	0	1997-07-02	2017-10-02	20.2519	2004	2	4	0	0	1	5	4	1	1	1	5	3	4	5	24	3	2	4	4	5	2	1	1	5	5	1	33	2	1	3	1	1	1	9	42	5	2	5	5	3	5	25	91
771	0	1997-06-02	2017-10-02	20.334	2004	2	4	0	0	1	2	3	1	3	2	1	1	3	1	15	4	2	3	2	3	4	2	4	1	3	2	30	3	3	3	2	1	3	15	45	5	1	1	3	5	3	18	78
772	0	1997-12-02	2017-10-02	19.833	2004	2	4	0	0	1	3	3	2	3	3	2	2	3	2	20	3	3	4	2	2	3	2	1	2	3	5	30	3	3	4	2	3	2	17	47	4	1	2	1	5	5	18	85
773	0	1998-02-11	2017-10-02	19.6386	2004	2	4	0	0	1	3	3	1	1	3	3	2	3	3	19	2	3	3	4	1	1	1	2	4	1	1	23	1	1	2	1	1	2	8	31	5	1	1	3	1	1	12	62
774	0	1994-09-25	2017-10-02	23.0198	2004	2	6	0	0	1	3	2	2	4	3	3	2	2	3	21	2	1	1	2	2	1	1	1	3	2	3	19	3	1	2	4	3	2	15	34	2	4	3	1	4	4	18	73
775	0	1997-05-03	2017-10-02	20.4162	2004	2	6	0	0	1	4	3	2	3	3	3	2	3	3	22	4	3	3	2	3	4	3	1	2	4	4	33	4	1	2	2	1	3	13	46	4	4	3	5	4	5	25	93
776	0	1995-10-28	2017-10-03	21.9329	2004	2	6	0	0	1	2	3	1	2	2	3	2	2	1	16	1	2	3	1	3	2	2	1	3	1	2	21	3	2	4	3	2	3	17	38	5	2	3	3	5	4	22	76
781	0	1996-01-04	2017-10-03	21.7467	2004	2	6	0	0	1	5	4	1	5	3	3	5	3	2	26	5	4	4	5	5	5	3	1	5	5	2	44	5	3	3	3	1	3	18	62	2	1	3	4	2	5	17	105
782	0	1995-07-14	2017-10-03	22.2231	2004	2	6	0	0	0	1	3	1	2	3	2	3	2	2	18	2	2	2	2	4	3	1	1	2	2	1	22	1	1	1	1	1	1	6	28	3	2	1	1	5	4	16	62
783	0	1995-09-17	2017-10-03	22.0452	2004	2	6	0	0	1	5	5	1	4	4	1	1	3	2	21	3	4	5	5	1	5	4	1	4	1	3	36	3	2	2	2	1	2	12	48	5	2	1	5	5	5	23	92
784	0	1996-01-27	2017-10-03	21.6838	2004	2	6	0	0	1	4	5	2	4	4	3	2	4	2	26	3	5	5	5	5	3	3	5	4	5	2	45	5	4	5	3	2	3	22	67	4	2	2	3	5	5	21	114
785	0	1994-04-20	2017-10-03	23.4552	2004	2	6	0	0	1	5	5	5	3	3	2	1	2	1	22	4	5	1	3	5	2	4	5	4	4	5	42	5	5	1	1	2	3	17	59	4	4	4	4	4	2	22	103
786	0	1995-03-01	2017-10-03	22.5927	2004	2	6	0	0	1	5	4	2	4	3	2	2	3	2	22	3	3	3	4	3	4	3	3	3	3	3	35	4	3	3	1	1	4	16	51	2	2	1	2	2	1	10	83
787	0	1997-01-24	2017-10-03	20.6899	2004	2	6	0	0	2	4	2	1	3	1	2	3	3	1	16	2	4	2	4	3	4	1	2	3	2	2	29	1	1	1	2	2	3	10	39	1	1	2	3	4	4	15	70
788	0	1997-01-23	2017-10-17	20.731	2003	2	4	0	0	1	4	3	3	3	4	4	2	4	5	28	4	4	3	3	2	5	4	2	2	4	1	34	3	4	4	4	2	5	22	56	3	4	4	4	5	3	23	107
789	0	1998-01-07	2017-10-17	19.7755	2003	2	4	0	0	1	4	4	5	5	4	3	5	5	3	34	1	5	5	5	5	5	1	3	2	3	4	39	2	4	2	2	4	3	17	56	3	1	2	1	2	2	11	101
790	0	1997-02-23	2017-10-17	20.6461	2003	2	4	0	0	1	5	4	3	5	4	4	2	4	3	29	4	4	3	3	2	5	5	3	5	4	5	43	4	3	4	4	2	3	20	63	3	2	3	3	5	5	21	113
791	0	1997-03-03	2017-10-17	20.6242	2003	2	4	1	0	1	5	4	4	5	4	5	2	5	4	33	5	5	3	4	5	5	5	3	5	5	5	50	5	5	5	5	4	5	29	79	2	2	2	1	3	2	12	124
792	0	1997-11-26	2017-10-17	19.8905	2003	2	4	0	0	1	4	4	3	3	2	3	2	4	2	23	5	3	5	3	5	5	3	4	4	4	4	45	3	4	4	3	2	4	20	65	4	4	4	4	3	5	24	112
793	0	1997-03-29	2017-10-17	20.553	2003	2	4	0	0	1	5	4	2	4	3	4	4	4	2	27	3	4	3	2	4	4	3	4	4	4	4	39	3	3	3	2	2	3	16	55	4	3	2	3	4	4	20	102
794	0	1996-04-02	2017-10-17	21.5414	2003	2	3	0	0	1	4	3	2	3	3	2	2	3	3	21	3	4	4	3	5	4	3	1	4	4	3	38	3	3	4	2	2	3	17	55	4	2	3	3	3	3	18	94
795	0	1996-05-25	2017-10-17	21.3963	2003	2	4	0	0	0	1	3	1	3	1	3	4	3	3	21	1	1	1	2	1	1	1	1	1	1	3	14	1	1	1	2	1	3	9	23	3	4	2	3	5	3	20	64
796	0	1996-04-01	2017-10-17	21.5441	2003	2	4	0	0	1	5	4	3	5	3	5	1	2	3	26	4	5	2	3	5	5	4	4	2	3	4	41	3	2	3	1	3	3	15	56	4	2	3	2	2	1	14	96
797	0	1997-10-02	2017-10-17	20.0411	2003	2	4	0	0	1	4	4	4	4	3	4	3	4	4	30	4	4	3	5	4	4	2	3	4	3	4	40	2	4	4	4	2	3	19	59	4	4	3	4	2	3	20	109
798	0	1998-02-04	2017-10-17	19.6988	2003	2	4	0	0	1	2	3	3	3	3	2	2	2	2	20	3	3	4	1	1	2	2	2	2	2	3	25	2	2	1	2	2	3	12	37	3	2	3	3	4	4	19	76
799	0	1998-03-04	2017-10-17	19.6222	2003	2	4	0	1	1	5	4	2	4	4	3	3	3	2	25	4	4	5	4	4	4	4	3	3	3	5	43	3	1	3	3	2	3	15	58	4	1	4	3	4	4	20	103
800	0	1996-08-06	2017-10-17	21.1964	2003	2	4	0	0	1	4	4	4	4	3	3	2	3	2	25	3	3	2	3	3	4	3	2	3	3	5	34	3	2	2	2	2	5	16	50	1	2	2	2	5	4	16	91
801	0	1997-07-14	2017-10-17	20.2601	2003	2	4	0	0	1	4	5	4	5	4	3	5	5	5	36	5	4	5	3	2	4	4	3	5	5	3	43	4	5	4	4	2	3	22	65	4	2	5	2	5	5	23	124
802	0	1998-03-29	2017-10-17	19.5537	2003	2	4	0	0	1	5	5	2	5	3	2	5	4	3	29	4	5	3	4	3	3	5	2	5	5	5	44	5	4	4	3	5	4	25	69	2	3	2	4	5	5	21	119
803	0	1998-01-06	2017-10-17	19.7782	2003	2	4	0	0	1	3	5	3	5	3	3	3	4	2	28	3	3	3	5	3	4	3	1	3	1	4	33	1	2	3	1	1	2	10	43	4	2	2	2	3	4	17	88
804	0	1996-09-16	2017-10-17	21.0842	2003	2	4	0	0	1	4	3	3	4	3	3	3	3	2	24	4	5	3	3	5	4	4	3	4	3	4	42	4	3	3	2	3	3	18	60	3	3	4	2	4	4	20	104
805	0	1995-10-10	2017-10-17	22.0205	2003	2	6	1	1	1	5	5	4	4	3	5	1	4	2	28	5	5	5	3	4	5	5	5	4	5	3	49	4	4	4	3	4	4	23	72	4	2	3	4	3	5	21	121
806	0	1997-01-12	2017-10-17	20.7611	2003	2	4	0	0	1	3	4	3	4	4	4	3	4	3	29	3	3	3	3	4	4	1	1	3	3	4	32	4	2	4	2	3	4	19	51	2	3	3	3	2	4	17	97
807	0	1997-07-22	2017-10-17	20.2382	2003	2	4	0	0	1	3	4	2	3	3	2	3	4	3	24	1	3	2	2	2	2	3	1	3	3	1	23	3	1	2	3	1	3	13	36	4	2	3	2	4	4	19	79
809	0	1992-06-05	2017-10-17	25.3662	2003	2	4	0	0	1	4	4	2	5	3	2	2	2	3	23	3	4	3	3	3	4	4	2	3	2	1	32	2	2	2	2	2	1	11	43	3	3	3	3	4	4	20	86
812	0	1996-12-03	2017-10-17	20.8706	2003	2	4	0	0	1	5	5	1	5	5	1	3	3	1	24	4	4	3	4	4	4	4	4	3	4	4	42	4	2	2	1	1	2	12	54	4	3	3	2	3	4	19	97
815	0	1996-09-20	2017-10-17	21.0732	2003	2	4	0	0	1	4	4	3	3	3	3	3	2	2	23	3	3	3	2	2	4	3	4	3	3	3	33	3	2	2	2	2	3	14	47	3	2	2	4	2	2	15	85
816	0	1997-07-18	2017-10-17	20.2491	2003	2	4	0	0	1	5	5	5	5	5	3	3	4	5	35	1	2	1	4	5	2	3	4	4	4	5	35	2	2	4	2	1	3	14	49	4	1	1	3	4	4	17	101
817	0	1996-12-18	2017-10-17	20.8296	2003	2	4	0	0	1	3	5	2	3	3	4	3	5	2	27	3	3	2	1	1	1	3	1	3	3	2	23	1	1	2	1	1	3	9	32	2	5	1	5	3	3	19	78
818	0	1994-07-21	2017-10-17	23.2416	2003	2	4	0	0	1	4	5	3	5	3	5	3	5	5	34	4	3	3	3	5	2	3	4	5	5	4	41	3	3	3	3	3	3	18	59	3	1	2	2	3	3	14	107
819	0	1997-11-09	2017-10-17	19.937	2003	2	4	1	0	1	4	4	3	4	3	2	3	3	4	26	5	3	4	2	4	3	4	4	5	5	3	42	5	5	5	4	4	4	27	69	3	1	1	2	2	1	10	105
820	0	1997-04-27	2017-10-17	20.4736	2003	2	4	0	0	1	3	4	2	3	4	2	2	3	3	23	2	3	2	3	1	3	4	2	3	2	3	28	2	3	1	2	3	3	14	42	3	3	3	3	3	4	19	84
821	0	1996-03-14	2017-10-17	21.5934	2003	2	4	0	0	1	3	3	2	3	2	3	3	4	3	23	1	2	3	3	1	2	1	1	4	4	2	24	4	3	2	2	1	3	15	39	3	2	3	3	5	5	21	83
822	0	1995-06-02	2017-10-17	22.3765	2003	2	6	0	0	1	5	3	3	5	3	3	2	2	2	23	3	4	4	3	4	4	1	1	5	4	3	36	3	2	4	1	2	4	16	52	2	3	3	2	3	3	16	91
824	0	1997-01-07	2017-10-17	20.7748	2003	2	6	0	0	1	5	5	4	5	5	4	4	4	4	35	4	4	2	5	4	5	5	1	4	5	3	42	3	5	5	4	4	4	25	67	3	4	1	2	5	3	18	120
825	0	1996-09-02	2017-10-17	21.1225	2003	2	6	0	0	1	3	3	3	3	3	3	2	3	2	22	2	3	3	3	1	3	2	1	3	2	3	26	2	2	3	1	3	3	14	40	4	2	2	3	5	5	21	83
826	0	1992-09-22	2017-10-17	25.0678	2003	2	4	0	0	1	4	3	3	2	2	3	2	2	2	19	2	2	2	2	3	2	2	2	3	2	4	26	2	2	3	2	2	3	14	40	4	4	3	4	4	4	23	82
828	0	1992-02-26	2017-10-17	25.64	2003	2	4	0	0	0	4	4	4	4	4	3	3	3	1	26	1	4	2	2	5	5	1	1	1	1	2	25	1	3	1	1	1	1	8	33	2	3	1	3	4	4	17	76
829	0	1996-11-29	2017-10-17	20.8816	2003	2	4	0	0	1	4	4	4	4	4	5	4	5	2	32	4	5	3	4	5	5	3	5	5	4	5	48	4	2	5	1	2	4	18	66	4	3	5	5	5	5	27	125
831	0	1995-06-16	2017-10-17	22.3381	2003	2	6	0	0	1	3	4	4	4	4	4	4	4	4	32	2	3	2	4	1	3	1	1	3	3	3	26	3	2	3	2	3	4	17	43	3	3	3	3	3	2	17	92
832	0	1994-11-21	2017-10-17	22.9049	2003	2	4	0	0	1	4	4	3	3	2	4	3	3	2	24	3	4	3	2	3	3	5	3	4	4	4	38	3	3	3	2	5	2	18	56	3	2	3	5	4	2	19	99
833	0	1997-10-21	2017-10-17	19.989	2003	2	4	0	0	1	4	4	3	4	3	4	3	4	4	29	2	1	1	1	4	4	4	1	2	3	2	25	2	1	2	2	1	2	10	35	2	1	3	2	2	3	13	77
834	0	1996-09-10	2017-10-17	21.1006	2003	2	4	0	0	1	4	4	3	3	3	3	4	3	2	25	3	4	3	3	3	4	4	2	3	3	4	36	3	3	4	3	2	3	18	54	3	2	3	3	4	5	20	99
835	0	1997-04-05	2017-10-17	20.5339	2003	2	4	0	0	1	5	3	4	4	3	4	2	3	2	25	5	3	2	4	4	5	4	1	5	4	2	39	4	3	4	5	3	5	24	63	3	1	1	1	4	1	11	99
836	0	1996-05-14	2017-10-17	21.4264	2003	2	4	0	0	1	5	5	4	4	3	5	3	3	3	30	3	2	4	2	3	3	3	2	5	5	2	34	2	3	4	3	2	3	17	51	3	1	2	1	1	4	12	93
837	0	1997-04-08	2017-10-17	20.5257	2003	2	4	0	0	1	3	3	3	4	3	3	1	3	1	21	3	4	3	1	2	3	2	1	4	2	3	28	2	2	4	2	4	5	19	47	2	1	4	4	3	3	17	85
838	0	1997-07-08	2017-10-17	20.2765	2003	2	4	0	0	1	3	4	3	4	3	3	3	3	2	25	3	4	4	2	3	4	2	1	3	3	2	31	2	4	3	3	2	4	18	49	5	1	3	3	3	2	17	91
839	0	1997-02-05	2017-10-17	20.6954	2003	2	3	0	0	1	4	3	4	3	2	1	2	3	2	20	1	2	1	2	5	1	4	1	3	3	4	27	4	5	5	4	4	4	26	53	3	1	1	4	1	5	15	88
841	0	1997-05-01	2017-10-18	20.4654	2003	2	4	0	0	1	4	3	2	3	3	2	3	3	3	22	4	4	3	4	1	4	4	4	3	3	4	38	2	1	2	2	1	2	10	48	4	3	3	4	4	4	22	92
842	0	1995-06-22	2017-10-18	22.3244	2003	2	4	0	0	1	1	3	3	3	2	2	2	2	1	18	1	2	1	2	2	1	1	2	2	2	2	18	1	2	2	2	1	3	11	29	2	3	4	3	5	4	21	68
843	0	1997-10-11	2017-10-18	20.0192	2003	2	4	0	0	1	2	1	1	2	1	1	1	1	1	9	2	2	2	2	3	2	2	2	2	1	4	24	1	2	1	2	1	3	10	34	2	1	2	3	4	3	15	58
844	0	1995-12-12	2017-10-18	21.8508	2003	2	6	0	0	1	4	3	3	4	3	2	3	2	4	24	2	2	4	2	5	4	3	2	4	5	4	37	3	3	2	1	2	2	13	50	3	1	3	4	3	4	18	92
845	0	1996-11-22	2017-10-18	20.9035	2003	2	4	0	0	1	4	4	3	3	2	2	3	3	2	22	3	1	1	1	1	3	2	1	3	2	3	21	3	1	1	1	2	3	11	32	2	2	3	2	2	3	14	68
846	0	1996-07-05	2017-10-18	21.2868	2003	2	4	0	1	1	5	3	3	4	3	2	4	4	3	26	1	3	2	5	2	3	3	2	5	4	4	34	2	2	3	2	2	2	13	47	3	2	3	2	2	4	16	89
848	0	1997-10-18	2017-10-18	20	2003	2	4	0	0	1	4	4	2	3	3	3	1	3	2	21	1	3	3	5	3	3	1	1	1	3	4	28	3	5	3	2	3	3	19	47	3	1	1	3	2	1	11	79
849	0	1997-08-16	2017-10-18	20.1725	2003	2	4	0	0	1	3	4	3	5	5	4	2	3	4	30	5	4	3	2	3	5	3	2	5	4	4	40	4	4	4	5	4	4	25	65	2	1	2	2	3	5	15	110
850	0	1997-08-23	2017-10-18	20.1533	2003	2	4	0	0	1	3	3	1	3	3	3	2	3	3	21	4	3	3	2	1	3	3	3	1	1	3	27	3	1	3	1	1	2	11	38	3	1	1	3	2	1	11	70
851	0	1996-08-29	2017-10-18	21.1362	2003	2	4	0	0	1	4	4	2	5	5	3	3	4	3	29	3	3	4	5	2	3	3	1	3	3	4	34	3	3	3	2	4	4	19	53	3	2	2	1	4	3	15	97
852	0	1997-03-11	2017-10-18	20.6051	2003	2	4	0	0	1	4	4	3	4	4	3	3	3	3	27	4	3	3	4	5	3	2	2	4	5	5	40	3	3	4	3	2	3	18	58	2	4	3	5	5	5	24	109
853	0	1996-05-17	2017-10-18	21.4209	2003	2	4	0	0	1	5	5	3	4	4	4	4	4	4	32	4	4	4	4	4	4	4	1	3	3	4	39	3	3	2	2	2	4	16	55	3	2	4	3	3	3	18	105
854	0	1996-02-16	2017-10-18	21.6701	2003	2	5	0	0	1	5	3	3	4	2	3	3	2	4	24	3	4	3	4	4	5	5	1	4	4	2	39	4	4	4	2	2	5	21	60	1	2	4	1	4	4	16	100
857	0	1994-05-17	2017-10-18	23.4223	2003	2	4	0	0	1	5	2	2	5	5	5	3	5	5	32	4	3	5	5	5	4	5	5	5	5	5	51	5	3	3	4	2	2	19	70	5	2	5	5	3	5	25	127
858	0	1996-01-10	2017-10-18	21.7714	2003	2	4	1	1	1	4	4	4	5	3	3	4	5	4	32	3	5	4	2	5	5	4	2	4	4	3	41	4	2	3	2	2	3	16	57	2	2	3	4	5	5	21	110
859	0	1991-08-30	2017-10-18	26.1355	2003	2	4	1	0	1	4	4	2	3	3	2	3	5	2	24	4	4	4	4	1	5	5	1	3	3	4	38	3	2	2	1	1	2	11	49	2	3	3	5	3	5	21	94
860	0	1994-11-22	2017-10-18	22.9049	2003	2	4	1	0	1	4	3	3	4	4	5	5	4	2	30	3	4	2	2	5	5	3	3	4	5	4	40	5	5	4	4	5	4	27	67	3	1	3	3	4	4	18	115
861	0	1997-07-03	2017-10-18	20.293	2003	2	4	0	0	1	5	4	4	4	3	3	2	3	3	26	3	4	3	3	5	5	5	3	4	4	4	43	4	2	3	2	3	4	18	61	3	2	2	2	3	5	17	104
862	0	1997-11-08	2017-10-19	19.9452	2003	2	4	0	0	1	5	4	4	5	4	4	3	4	4	32	3	5	4	3	2	5	5	2	4	5	5	43	4	3	2	2	1	3	15	58	2	2	4	3	4	3	18	108
863	0	1997-11-23	2017-10-18	19.9014	2003	2	4	0	0	1	3	5	2	4	3	3	1	3	2	23	2	3	2	3	2	3	3	1	2	2	4	27	3	2	3	2	3	2	15	42	2	3	2	2	2	3	14	79
864	0	1995-12-11	2017-10-18	21.8535	2003	2	4	0	0	1	4	4	2	4	2	1	1	3	2	19	3	3	2	2	4	4	1	2	3	3	3	30	1	1	2	1	1	3	9	39	4	3	4	3	3	4	21	79
865	0	1993-03-08	2017-10-18	24.6133	2003	2	4	1	1	1	5	5	4	4	4	4	4	4	3	32	5	5	5	5	1	5	5	4	5	4	3	47	5	4	4	3	3	3	22	69	3	2	3	3	3	5	19	120
866	0	1997-03-07	2017-10-18	20.616	2003	2	6	0	0	1	3	4	3	4	4	4	4	4	2	29	3	3	2	2	2	4	4	1	3	4	4	32	4	4	4	4	2	4	22	54	3	4	3	3	3	3	19	102
867	0	1995-12-26	2017-10-18	21.8125	2003	2	4	0	0	1	3	3	3	3	2	2	2	2	3	20	3	3	2	2	1	3	2	4	2	2	3	27	2	2	2	2	1	2	11	38	1	3	3	3	5	3	18	76
868	0	1997-01-05	2017-10-18	20.783	2003	2	6	0	0	1	4	4	3	5	3	4	5	3	4	31	3	4	4	3	4	4	4	1	3	3	4	37	3	2	2	3	2	3	15	52	4	2	3	2	3	4	18	101
869	0	1993-12-06	2017-10-18	23.8658	2003	2	5	0	0	1	4	2	1	4	2	3	2	1	1	16	1	3	4	3	1	3	1	3	3	3	1	26	2	2	1	1	1	1	8	34	3	2	4	2	4	3	18	68
870	0	1994-11-16	2017-10-18	22.9213	2003	2	4	1		1	4	4	2	4	5	3	2	5	5	30	2	4	4	3	2	4	2	3	4	2	5	35	2	2	2	3	1	4	14	49	3	3	4	4	1	4	19	98
872	0	1996-09-13	2017-10-18	21.0951	2003	2	4	0	0	1	5	5	5	5	5	5	5	4	4	38	5	5	4	5	5	5	3	5	5	5	5	52	5	5	5	5	4	5	29	81	3	3	4	3	2	5	20	139
873	0	1997-08-19	2017-10-18	20.1643	2003	2	4	0	0	1	4	4	3	4	2	3	3	2	2	23	3	3	5	3	5	4	4	2	2	3	5	39	2	3	3	2	2	3	15	54	3	3	3	4	3	4	20	97
875	0	1996-07-26	2017-10-18	21.2293	2003	2	6	1	0	1	4	5	4	5	4	4	3	4	2	31	4	5	5	5	4	4	4	5	5	5	5	51	5	5	5	3	4	4	26	77	2	1	2	1	3	4	13	121
876	0	1996-03-26	2017-10-18	21.5633	2003	2	6	0	0	1	4	4	2	5	4	4	3	4	3	29	4	3	4	4	2	4	4	2	4	3	3	37	2	2	3	2	2	2	13	50	5	4	3	3	5	4	24	103
877	0	1996-08-09	2017-10-18	21.191	2003	2	6	0	0	1	4	4	3	3	4	3	2	2	3	24	5	5	3	3	4	5	5	5	5	5	5	50	5	4	4	3	5	5	26	76	3	2	2	5	5	3	20	120
878	0	1995-08-02	2017-10-18	22.2122	2003	2	6	0	0	1	4	4	2	4	4	4	4	4	4	30	3	4	4	4	2	4	4	1	4	4	3	37	4	2	2	4	4	3	19	56	4	4	4	3	3	5	23	109
879	0	1997-01-14	2017-11-09	20.8186	2005	2	6	0	0	1	4	4	3	3	3	2	3	3	2	23	3	4	4	4	3	5	5	4	3	3	4	42	3	3	2	2	2	3	15	57	5	2	3	3	3	4	20	100
880	0	1996-07-05	2017-10-30	21.3196	2005	2	6	0	0	1	5	5	3	5	5	5	4	5	2	34	2	5	3	4	3	5	5	2	4	4	4	41	5	3	3	4	2	5	22	63	4	3	1	4	1	2	15	112
882	0	1996-10-03	2017-10-30	21.0732	2005	2	4	0	0	1	3	4	3	3	3	3	2	3	2	23	3	4	2	2	1	4	4	2	2	2	3	29	2	2	3	3	3	3	16	45	3	1	2	2	3	4	15	83
883	0	1997-06-23	2017-10-30	20.3532	2005	2	6	0	0	1	5	4	3	3	3	5	4	4	2	28	3	3	2	3	2	4	4	2	3	3	2	31	3	2	2	2	1	2	12	43	3	1	2	1	5	3	15	86
884	0	1995-12-28	2017-10-30	21.8398	2005	2	6	0	0	1	5	3	3	5	3	3	2	3	3	25	2	4	4	3	3	5	3	2	3	3	5	37	3	2	3	3	1	3	15	52	3	3	3	4	4	3	20	97
885	0	1998-03-11	2017-10-30	19.6386	2005	2	4	0	0	1	3	4	2	4	3	3	4	4	3	27	3	3	4	2	4	2	3	1	3	3	3	31	2	2	2	2	2	2	12	43	4	3	4	4	4	4	23	93
886	0	1996-12-30	2017-10-30	20.8323	2005	2	6	0	0	1	5	4	3	5	3	3	4	4	4	30	5	4	5	5	5	5	3	4	5	5	4	50	4	3	4	2	3	3	19	69	3	3	1	3	5	1	16	115
888	0	1998-02-10	2017-10-30	19.718	2005	2	4	0	0	1	4	5	4	5	5	3	4	5	3	34	3	4	4	4	5	4	4	2	5	4	3	42	4	3	3	3	2	4	19	61	4	4	3	3	2	4	20	115
890	0	1997-05-28	2017-10-30	20.4244	2005	2	6	0	0	1	4	4	5	3	1	4	4	3	3	27	4	3	3	2	2	4	3	1	2	3	2	29	1	1	3	2	1	4	12	41	4	4	3	5	5	5	26	94
891	0	1996-06-22	2017-10-30	21.3552	2005	2	6	0	0	1	4	4	3	4	4	3	4	3	2	27	2	3	4	5	2	3	2	1	3	3	4	32	3	2	3	3	2	2	15	47	3	2	3	3	2	3	16	90
892	0	1996-09-10	2017-10-30	21.1362	2005	2	4	0	0	1	3	4	1	5	2	2	3	3	3	23	2	1	2	3	4	4	2	1	5	2	4	30	2	1	2	2	1	2	10	40	4	3	1	3	3	5	19	82
895	0	1995-01-03	2017-10-30	22.8227	2005	2	4	1	0	1	4	5	5	4	3	3	5	4	4	33	5	3	3	3	3	5	4	1	4	5	3	39	5	4	5	3	3	5	25	64	3	3	4	2	4	3	19	116
897	0	1996-07-03	2017-10-30	21.3251	2005	2	4	0	0	1	5	4	3	4	2	3	2	3	3	24	4	5	5	3	5	4	2	3	4	5	5	45	4	4	4	4	4	5	25	70	2	1	3	1	5	3	15	109
898	0	1998-01-02	2017-10-30	19.8248	2005	2	4	0	0	1	4	4	1	4	2	1	2	4	2	20	3	3	2	2	1	4	2	1	4	4	5	31	2	2	4	2	4	3	17	48	3	2	1	2	3	5	16	84
899	0	1997-10-14	2017-10-30	20.0438	2005	2	4	0	0	1	3	4	2	3	3	2	1	3	1	19	2	4	3	2	4	4	3	2	3	3	3	33	3	2	2	2	2	3	14	47	3	2	3	4	3	3	18	84
900	0	1997-12-09	2017-10-30	19.8905	2005	2	4	0	0	1	5	4	5	5	4	5	3	5	3	34	5	4	3	5	1	5	4	1	4	5	4	41	5	4	3	3	1	3	19	60	4	3	5	4	4	5	25	119
901	0	1996-07-14	2017-10-30	21.295	2005	2	4	0	0	1	4	4	4	4	4	2	2	3	2	25	3	4	4	4	2	4	4	4	3	2	3	37	2	2	2	3	1	3	13	50	5	3	4	4	4	3	23	98
902	0	1997-04-30	2017-10-30	20.501	2005	2	6	0	0	1	4	5	2	4	4	5	3	5	3	31	1	5	5	5	5	5	4	1	5	5	1	42	5	5	5	4	2	5	26	68	4	2	3	4	2	5	20	119
905	0	1994-05-10	2017-10-30	23.4743	2005	2	4	0	0	1	3	5	3	2	3	3	2	3	1	22	3	4	4	2	1	3	1	1	4	3	3	29	3	3	1	2	2	4	15	44	4	2	2	5	3	3	19	85
907	0	1997-11-18	2017-10-30	19.948	2005	2	4	0	0	1	5	5	4	4	4	2	1	5	1	26	4	3	3	4	5	5	2	4	5	5	5	45	2	5	5	5	4	5	26	71	3	5	5	5	3	4	25	122
908	0	1997-12-10	2017-10-30	19.8877	2005	2	4	0	0	1	5	5	2	5	3	5	3	5	5	33	4	5	5	3	5	3	5	2	5	5	4	46	5	1	3	2	3	4	18	64	4	1	3	4	1	2	15	112
909	0	1998-01-26	2017-10-30	19.7591	2005	2	4	0	0	1	3	5	2	4	3	2	3	2	2	23	2	5	2	3	1	5	5	2	3	1	5	34	2	4	1	4	2	3	16	50	4	5	4	5	5	5	28	101
911	0	1997-10-02	2017-10-30	20.0767	2005	2	4	0	0	1	5	4	3	5	3	4	3	4	3	29	3	4	4	4	2	4	2	4	4	4	4	39	4	2	3	2	3	3	17	56	4	2	2	4	5	3	20	105
912	0	1997-12-18	2017-10-30	19.8658	2005	2	4	0	0	1	4	4	4	5	4	3	2	4	2	28	3	3	3	3	3	4	4	2	3	4	4	36	3	3	3	2	2	3	16	52	4	2	4	4	4	2	20	100
914	0	1997-12-01	2017-10-30	19.9124	2005	2	4	0	0	1	5	5	4	5	5	5	2	3	2	31	2	5	3	4	5	5	3	1	3	3	4	38	3	3	3	3	2	4	18	56	1	2	2	4	3	3	15	102
915	0	1998-02-23	2017-10-30	19.6824	2005	2	4	0	0	1	3	5	1	4	4	2	2	4	3	25	4	5	4	4	5	5	4	3	4	5	4	47	5	4	5	3	4	5	26	73	3	3	3	1	1	4	15	113
916	0	1997-08-14	2017-10-30	20.2108	2005	2	4	0	0	1	5	5	2	5	4	2	3	4	3	28	4	5	4	3	5	5	5	5	5	4	4	49	4	3	4	3	3	4	21	70	3	3	3	3	3	3	18	116
919	0	1997-01-22	2017-10-30	20.7693	2005	2	4	0	0	1	4	5	3	4	4	3	2	4	2	27	3	5	4	1	4	5	5	1	4	4	4	40	3	3	3	3	2	4	18	58	5	2	3	4	4	4	22	107
921	0	1998-03-26	2017-10-30	19.5975	2005	2	4	0	0	1	3	4	3	3	3	2	3	3	4	25	3	4	2	2	5	3	5	3	3	2	3	35	2	3	2	1	3	3	14	49	3	2	3	2	3	3	16	90
925	0	1998-03-17	2017-10-30	19.6222	2005	2	4	0	0	1	3	4	3	3	3	3	3	4	3	26	1	3	2	2	1	3	3	1	3	2	4	25	2	2	2	2	1	3	12	37	2	2	3	3	5	4	19	82
926	0	1997-04-01	2017-10-30	20.5804	2005	2	4	0	0	1	5	5	3	4	3	2	3	3	3	26	3	4	2	5	1	4	3	1	4	3	5	35	4	3	5	4	3	4	23	58	3	3	3	2	3	4	18	102
927	0	1996-05-28	2017-10-30	21.4237	2005	2	4	1	1	1	5	3	4	4	3	3	3	3	3	26	4	4	3	1	1	4	4	2	2	4	2	31	4	3	3	3	2	3	18	49	3	1	2	2	3	3	14	89
929	0	1998-02-20	2017-10-30	19.6906	2005	2	4	0	0	1	3	4	2	4	3	3	3	4	2	25	1	4	3	2	3	5	2	1	2	2	3	28	1	2	1	3	1	3	11	39	3	2	3	2	4	5	19	83
930	0	1996-12-12	2017-10-30	20.8816	2005	2	4	0	0	1	5	4	2	4	3	3	2	3	3	24	5	4	3	3	5	4	3	3	5	3	3	41	3	4	3	3	2	3	18	59	2	2	3	2	4	3	16	99
931	0	1994-07-18	2017-10-30	23.2854	2005	2	4	0	0	1	5	5	5	5	5	4	1	5	2	32	4	4	3	3	1	5	4	3	5	4	4	40	3	4	4	2	3	5	21	61	1	1	1	1	1	5	10	103
932	0	1997-12-15	2017-10-30	19.8741	2005	2	4	0	0	1	5	4	3	4	3	3	2	3	2	24	2	4	1	1	4	4	4	1	4	5	4	34	3	4	4	2	3	3	19	53	5	3	3	3	4	4	22	99
933	0	1997-12-19	2017-10-30	19.8631	2005	2	4	0	1	1	4	3	2	3	3	2	2	2	2	19	2	1	2	2	1	4	4	1	3	3	3	26	2	2	2	1	1	2	10	36	3	4	4	4	4	4	23	78
934	0	1997-07-22	2017-10-30	20.2738	2005	2	4	0	1	1	4	4	4	5	4	4	3	4	3	31	3	4	5	3	5	5	3	3	3	3	4	41	3	4	4	4	3	4	22	63	4	2	3	2	4	3	18	112
935	0	1997-08-24	2017-10-30	20.1834	2005	2	4	0	0	1	4	5	2	5	4	4	3	5	4	32	4	3	2	3	4	4	3	4	4	3	4	38	2	1	2	2	2	1	10	48	5	2	3	4	5	5	24	104
938	0	1997-06-29	2017-10-30	20.3368	2005	2	4	0	0	1	5	4	2	5	4	5	3	5	2	30	2	5	5	2	4	5	4	1	5	5	4	42	5	4	3	3	2	4	21	63	4	2	3	5	5	5	24	117
939	0	1998-04-19	2017-10-30	19.5318	2005	2	4	0	0	1	3	4	2	4	4	3	2	3	2	24	3	3	3	2	4	4	4	3	4	3	4	37	3	2	2	2	1	3	13	50	3	2	3	4	3	5	20	94
940	0	1997-09-08	2017-10-30	20.1424	2005	2	4	0	0	1	4	3	3	4	3	4	3	4	2	26	3	2	3	1	1	3	2	1	4	4	4	28	3	4	4	2	3	3	19	47	5	5	3	4	5	1	23	96
941	0	1998-12-29	2017-10-30	18.8364	2005	2	4	0	0	1	2	3	3	4	4	4	3	3	2	26	1	2	3	1	2	4	2	1	2	3	3	24	2	3	3	2	3	2	15	39	3	1	3	2	2	4	15	80
942	0	1998-06-06	2017-10-30	19.4004	2005	2	4	0	0	1	5	5	3	5	4	5	2	5	2	31	2	4	3	3	2	3	4	3	1	3	3	31	3	3	3	2	3	3	17	48	4	2	4	4	4	5	23	102
943	0	1996-07-12	2017-10-30	21.3005	2005	2	4	0	0	1	5	5	4	5	4	5	4	5	3	35	5	5	3	3	5	5	3	4	5	4	4	46	5	4	5	3	3	4	24	70	4	2	2	3	1	1	13	118
944	0	1996-11-18	2017-11-09	20.9747	2005	2	6	0	0	1	4	4	4	4	3	2	3	5	3	28	5	5	3	5	2	2	3	1	4	3	2	35	3	1	2	1	2	1	10	45	5	3	3	2	2	5	20	93
945	0	1995-09-30	2017-11-09	22.1109	2005	2	6	0	0	1	5	5	3	5	5	1	3	5	3	30	4	5	4	4	3	5	5	5	4	1	1	41	3	5	5	4	3	4	24	65	4	5	3	3	5	5	25	120
946	0	1995-08-03	2017-11-09	22.2697	2005	2	6	0	0	1	4	4	5	4	3	3	3	4	3	29	3	3	4	4	4	4	4	4	3	3	3	39	3	4	3	3	3	4	20	59	5	4	3	3	5	5	25	113
948	0	1994-12-09	2017-11-09	22.9185	2005	2	6	0	0	1	3	4	3	4	3	3	3	3	4	27	3	1	2	1	1	2	2	1	2	2	2	19	2	1	1	1	1	2	8	27	4	3	3	4	4	5	23	77
949	0	1995-08-22	2017-11-09	22.2177	2005	2	6	0	0	1	2	5	3	4	3	4	1	5	1	26	3	4	1	2	3	5	1	1	1	2	3	26	3	3	3	2	4	4	19	45	2	1	4	4	5	5	21	92
950	0	1996-08-01	2017-11-09	21.2731	2005	2	6	0	0	1	5	5	4	5	5	2	2	4	1	28	4	4	4	5	5	5	5	1	4	3	3	43	3	3	3	2	1	4	16	59	4	1	4	4	4	4	21	108
951	0	1989-07-06	2017-11-09	28.345	2005	2	6	0	0	1	5	3	3	5	3	3	2	5	2	26	5	5	3	4	5	5	3	5	4	5	5	49	5	5	5	3	4	3	25	74	3	3	4	5	3	4	22	122
956	0	1996-05-22	2017-11-09	21.4675	2005	2	6	0	0	1	5	5	5	5	5	3	2	5	3	33	3	5	4	5	5	3	1	1	4	5	1	37	1	1	1	2	1	4	10	47	3	2	2	4	5	4	20	100
959	0	1996-09-22	2017-11-09	21.1307	2005	2	6	0	0	1	4	5	3	5	5	3	3	5	3	32	3	3	2	2	2	4	2	2	4	4	2	30	3	3	3	2	2	2	15	45	4	3	2	3	4	4	20	97
960	0	1995-04-04	2017-11-09	22.601	2005	2	6	0	0	1	3	5	5	4	4	3	3	4	2	30	3	4	1	2	1	5	3	1	3	3	3	29	3	2	3	3	2	3	16	45	3	3	3	3	5	5	22	97
961	0	1997-01-04	2017-11-09	20.846	2005	2	6	0	0	1	4	4	3	4	3	3	3	3	3	26	4	4	3	2	4	4	3	2	3	4	4	37	4	4	4	3	4	4	23	60	2	2	3	3	3	2	15	101
964	0	1995-10-03	2017-11-09	22.1027	2005	2	6	0	0	1	5	5	4	5	5	3	3	4	2	31	3	5	4	3	4	5	4	2	4	4	4	42	4	3	3	2	2	4	18	60	4	3	3	3	3	3	19	110
965	0	1996-04-03	2017-11-09	21.6016	2005	2	6	0	0	1	4	5	3	4	5	2	2	4	2	27	3	4	5	3	2	4	4	3	4	4	4	40	3	3	3	2	2	3	16	56	4	4	4	4	4	5	25	108
967	0	1995-07-19	2017-11-09	22.3107	2005	2	6	0	0	1	5	5	4	4	5	3	2	4	3	30	4	5	4	5	5	5	5	5	5	5	5	53	3	5	5	5	4	5	27	80	3	3	3	3	3	3	18	128
968	0	1996-08-23	2017-11-09	21.2129	2005	2	6	0	0	1	5	5	3	3	3	2	2	3	2	23	4	4	4	4	5	5	5	2	2	5	5	45	2	5	3	3	3	4	20	65	2	3	2	4	5	3	19	107
971	0	1995-12-26	2017-11-09	21.8727	2005	2	6	0	0	1	4	4	3	3	3	3	3	4	2	25	3	4	3	1	3	4	2	1	3	3	4	31	1	1	2	1	1	3	9	40	3	2	3	3	3	4	18	83
972	0	1996-05-23	2017-11-09	21.4648	2005	2	6	1	0	1	5	5	4	5	5	4	4	4	3	34	4	5	2	5	5	4	5	5	4	4	3	46	3	2	4	2	3	4	18	64	5	2	3	3	3	3	19	117
974	0	1996-05-16	2017-11-09	21.4839	2005	2	6	0	0	1	3	5	3	5	4	2	4	4	3	30	3	3	3	3	1	4	5	1	4	3	4	34	3	3	3	3	2	3	17	51	3	3	3	3	3	5	20	101
976	0	1995-03-20	2017-11-09	22.642	2005	2	6	0	0	1	4	4	3	4	3	2	4	4	2	26	4	4	4	3	3	4	4	3	4	4	4	41	4	4	4	4	3	3	22	63	4	4	4	4	4	4	24	113
978	0	1996-05-23	2017-11-09	21.4648	2005	2	6	0	1	1	5	5	4	5	5	4	4	5	5	37	4	5	5	3	5	5	5	4	5	5	5	51	5	5	5	5	4	5	29	80	5	4	3	3	1	1	17	134
979	0	1996-04-24	2017-11-09	21.5441	2005	2	6	0	0	1	3	5	3	3	4	2	3	4	2	26	3	3	2	2	1	4	2	1	2	2	4	26	2	3	2	2	1	2	12	38	1	2	1	2	4	4	14	78
981	0	1994-09-06	2017-11-09	23.1759	2005	2	6	0	0	1	5	5	4	5	5	5	5	5	3	37	3	5	3	4	5	5	4	5	5	5	3	47	5	5	5	2	3	5	25	72	4	4	4	4	2	1	19	128
982	0	1996-08-07	2017-11-09	21.2567	2005	2	6	0	0	1	5	5	2	5	4	4	3	5	3	31	3	4	1	1	3	5	3	1	4	3	4	32	2	3	3	3	2	3	16	48	3	5	2	3	3	2	18	97
984	0	1994-01-12	2017-11-09	23.8248	2005	2	6	0	0	1	5	4	3	3	3	2	2	5	1	23	3	4	3	2	1	5	3	2	4	2	2	31	2	2	1	1	1	3	10	41	4	2	3	3	5	5	22	86
985	0	1992-09-02	2017-11-09	25.1855	2005	2	6	0	0	1	3	4	1	4	3	1	1	4	1	19	2	5	3	5	3	5	3	2	4	3	4	39	3	3	2	2	3	3	16	55	4	2	4	4	2	5	21	95
986	0	1996-11-25	2017-11-09	20.9555	2005	2	6	0	1	1	5	4	2	4	5	5	2	4	5	31	5	5	5	2	3	5	5	1	4	5	4	44	5	3	4	3	3	5	23	67	1	1	4	3	4	3	16	114
987	0	1996-10-15	2017-11-09	21.0678	2005	2	6	0	0	1	4	5	2	5	5	3	1	5	5	31	4	5	2	4	5	5	4	2	5	4	4	44	3	1	2	2	1	3	12	56	5	1	3	3	1	4	17	104
988	0	1996-09-09	2017-11-09	21.1663	2005	2	6	0	0	1	5	4	3	5	4	4	2	5	5	32	2	4	5	3	2	5	4	4	5	4	4	42	5	5	4	4	3	2	23	65	3	3	5	4	5	5	25	122
989	0	1996-01-28	2017-11-09	21.7823	2005	2	6	1	0	1	4	5	3	4	5	3	3	5	2	30	5	5	3	3	5	5	4	5	5	5	5	50	5	4	5	3	3	4	24	74	2	2	3	2	5	3	17	121
990	0	1994-06-30	2017-11-09	23.3621	2005	2	6	0	0	1	4	3	3	4	3	2	3	4	2	24	4	2	3	3	1	3	1	1	3	3	4	28	2	1	2	3	2	3	13	41	2	2	3	3	5	5	20	85
991	0	1997-06-27	2017-11-09	20.3696	2005	2	6	0	0	1	4	5	4	4	5	3	3	4	3	31	1	2	4	3	4	5	4	4	2	2	4	35	1	5	4	4	2	4	20	55	3	4	4	3	5	5	24	110
992	0	1995-07-18	2017-11-09	22.3135	2005	2	6	0	0	1	5	4	3	4	4	3	3	5	5	31	3	3	2	3	4	3	3	4	2	4	4	35	4	4	4	3	3	3	21	56	3	2	3	2	3	5	18	105
993	0	1997-04-02	2017-11-09	20.6051	2005	2	6	0	0	1	5	4	2	4	3	2	2	3	1	21	3	3	3	2	2	3	3	2	3	3	3	30	3	2	3	2	2	3	15	45	2	1	1	3	4	4	15	81
994	0	1995-09-12	2017-11-09	22.1602	2005	2	6	0	0	1	4	4	3	5	5	3	3	5	3	31	5	5	5	5	4	5	3	4	5	4	1	46	3	3	3	2	3	4	18	64	5	2	4	3	3	3	20	115
995	0	1993-06-14	2017-06-14	24	3001	3	5	0	0	1	4	3	3	3	1	3	1	1	2	17	1	2	1	1	2	1	1	1	1	2	1	14	1	1	1	1	1	1	6	20	4	3	3	5	5	5	25	62
996	0	1995-10-01	2017-06-14	21.7029	3001	3	5	0	0	1	4	4	5	5	3	3	3	3	3	29	3	4	3	2	1	4	3	1	3	3	3	30	3	3	4	4	1	3	18	48	3	2	4	1	5	5	20	97
997	0	1996-11-12	2017-06-14	20.5859	3001	3	5	0	0	1	3	4	3	4	3	2	2	3	3	24	2	3	2	2	4	4	4	1	2	2	3	29	2	2	2	2	1	4	13	42	2	1	3	3	4	4	17	83
999	0	1996-07-17	2017-06-14	20.909	3001	3	5	0	0	1	4	3	4	5	4	3	3	2	2	26	2	2	2	1	3	4	4	1	5	3	5	32	4	5	1	5	3	4	22	54	1	1	4	2	5	1	14	94
1000	0	1994-10-20	2017-06-14	22.6502	3001	3	5	0	0	1	4	5	5	5	5	5	5	5	5	40	3	5	4	5	5	5	1	2	4	4	5	43	5	5	5	2	4	5	26	69	3	1	1	3	3	5	16	125
1001	0	1996-12-20	2017-06-14	20.4819	3001	3	5	0	0	1	5	5	5	5	5	5	3	5	4	37	1	5	3	3	4	5	4	3	5	4	5	42	5	4	4	3	3	4	23	65	3	1	3	2	2	2	13	115
1002	0	1996-08-18	2017-06-14	20.8214	3001	3	5	0	0	1	3	5	3	3	2	4	4	3	4	28	2	2	2	1	4	3	4	1	4	4	4	31	3	4	3	2	2	1	15	46	3	3	4	4	4	4	22	96
1003	0	1997-05-29	2017-06-14	20.0438	3001	3	5	0	0	1	4	4	4	4	4	4	3	4	3	30	3	4	3	4	2	5	4	3	4	4	4	40	4	4	4	5	3	5	25	65	3	2	4	5	3	5	22	117
1004	0	1996-09-16	2017-06-14	20.742	3001	3	5	0	0	1	4	4	3	4	4	2	2	3	3	25	3	4	5	3	3	5	4	5	3	4	3	42	4	4	5	4	3	5	25	67	3	1	4	1	3	3	15	107
1006	0	1995-09-30	2017-06-12	21.7002	3002	3	5	0	0	1	2	3	3	4	4	4	2	4	2	26	3	5	2	2	1	5	2	1	2	1	5	29	1	2	1	4	1	5	14	43	3	1	3	2	1	1	11	80
1008	0	1996-11-22	2017-06-12	20.553	3002	3	5	0	0	1	4	3	2	3	3	4	3	4	2	24	4	3	4	2	1	4	3	2	2	2	4	31	3	1	1	1	3	2	11	42	4	1	2	1	3	2	13	79
1010	0	1995-11-20	2017-06-12	21.5606	3002	3	5	0	0	1	5	4	2	4	3	5	2	3	3	26	4	4	4	4	1	4	3	2	3	3	3	35	3	1	2	3	2	4	15	50	4	1	4	2	3	4	18	94
1013	0	1997-04-26	2017-06-12	20.1287	3002	3	5	0	0	1	3	3	2	2	2	2	3	2	3	19	1	4	4	2	1	5	2	1	1	3	3	27	2	1	1	2	1	3	10	37	2	2	3	1	2	4	14	70
1014	0	1995-09-11	2017-06-12	21.7522	3002	3	5	0	0	1	5	4	3	4	4	3	4	4	2	28	4	4	3	3	3	3	3	5	4	4	3	39	3	4	4	5	3	3	22	61	4	5	3	4	5	5	26	115
1016	0	1996-10-28	2017-06-12	20.6215	3002	3	5	0	0	1	4	4	3	5	3	3	3	5	3	29	3	5	2	4	5	5	4	2	5	5	5	45	4	2	3	1	5	2	17	62	-9	2	3	5	5	5	11	102
1017	0	1996-06-14	2017-06-12	20.9938	3002	3	5	0	0	1	3	3	3	3	3	4	3	3	2	24	1	2	3	2	4	3	1	1	2	1	1	21	2	1	2	1	2	3	11	32	3	4	3	4	4	4	22	78
1018	0	1995-05-03	2017-06-12	22.1109	3002	3	5	0	0	1	2	4	3	4	2	2	2	3	3	23	2	4	3	1	4	5	3	1	3	4	5	35	2	4	3	4	3	4	20	55	5	2	1	3	2	2	15	93
1019	0	1995-10-31	2017-06-12	21.6153	3002	3	5	0	0	1	3	3	2	4	3	4	2	3	2	23	3	3	3	3	3	4	2	1	4	3	2	31	3	2	2	3	1	2	13	44	3	2	3	1	3	3	15	82
1020	0	1995-12-17	2017-06-12	21.4867	3002	3	5	0	0	1	3	3	3	3	3	2	2	2	4	22	2	3	3	4	3	5	3	4	3	3	5	38	3	4	4	2	2	4	19	57	3	2	4	4	3	5	21	100
1021	0	1997-11-15	2017-06-19	19.5921	3003	3	3	0	0	1	3	5	2	2	3	3	1	3	1	20	4	4	4	1	-9	3	1	1	4	4	5	22	3	5	5	5	3	5	26	48	3	2	3	1	4	5	18	86
1022	0	1996-10-31	2017-06-19	20.6324	3003	3	3	0	0	1	4	3	2	3	3	4	3	3	3	24	3	4	2	4	4	4	4	2	5	5	4	41	3	4	4	2	3	2	18	59	2	2	1	1	4	2	12	95
1023	0	1997-02-06	2017-06-19	20.3641	3003	3	3	0	0	1	4	5	5	3	3	2	2	5	2	27	4	3	5	3	4	5	3	1	3	4	2	37	2	1	1	1	1	1	7	44	3	1	3	2	1	5	15	86
1024	0	1997-10-21	2017-06-19	19.6605	3003	3	3	0	0	1	5	5	4	5	5	4	3	5	2	33	4	5	1	5	5	5	5	2	4	2	4	42	2	3	4	2	1	5	17	59	5	2	1	3	5	3	19	111
1025	0	1995-09-07	2017-06-19	21.7823	3003	3	3	0	0	1	3	4	2	4	2	3	3	3	3	24	3	4	2	2	3	4	3	2	3	3	1	30	3	4	4	4	2	2	19	49	3	2	4	3	3	2	17	90
1028	0	1997-04-11	2017-06-19	20.1889	3003	3	3	0	0	1	4	4	5	5	5	5	5	5	3	37	4	4	5	4	4	5	4	2	5	3	4	44	3	4	5	3	3	4	22	66	4	2	4	4	4	5	23	126
1029	0	1996-10-17	2017-06-19	20.6708	3003	3	3	0	0	1	3	5	2	5	4	2	3	4	3	28	3	3	3	3	2	3	-9	3	4	3	4	22	3	3	4	3	3	3	19	41	3	3	4	3	5	5	23	92
1032	0	1998-03-02	2017-06-19	19.2991	3003	3	3	1	1	1	5	5	5	5	5	5	2	3	1	31	5	5	5	5	1	5	5	1	5	5	5	47	5	5	5	1	3	5	24	71	5	1	1	5	1	1	14	116
1034	0	1996-09-19	2017-06-19	20.7474	3003	3	3	0	0	1	5	4	2	3	3	2	2	4	2	22	3	5	3	5	4	5	2	3	5	3	2	40	3	4	4	4	4	3	22	62	3	3	3	3	1	2	15	99
1035	0	1997-02-25	2017-06-19	20.3121	3003	3	3	0	0	1	4	4	2	3	1	1	1	4	1	17	3	3	3	1	1	4	1	1	2	2	3	24	2	1	2	1	1	3	10	34	3	1	1	1	3	4	13	64
1036	0	1996-09-10	2017-06-19	20.7721	3003	3	3	0	0	1	4	4	3	4	4	4	4	4	2	29	4	4	3	2	1	4	3	3	4	3	4	35	3	3	4	2	4	3	19	54	3	2	1	1	3	1	11	94
1038	0	1997-02-28	2017-06-19	20.3039	3003	3	3	0	0	1	4	5	2	5	4	3	2	-9	3	15	4	3	4	5	5	2	2	1	5	4	2	37	3	2	3	1	1	2	12	49	4	1	3	2	3	3	16	80
1039	0	1997-09-06	2017-06-19	19.7837	3003	3	3	0	0	1	3	4	3	4	5	3	3	5	1	28	4	4	3	3	2	3	4	3	3	3	2	34	3	3	3	2	2	3	16	50	3	2	3	3	4	4	19	97
1040	0	1996-10-20	2017-06-19	20.6626	3003	3	3	0	0	1	2	3	3	3	2	2	2	3	1	19	3	2	2	3	1	4	2	1	2	2	3	25	1	1	1	1	1	2	7	32	4	3	3	3	4	5	22	73
1041	0	1996-08-19	2017-06-19	20.8323	3003	3	5	0	0	1	4	4	3	3	3	3	4	4	3	27	4	3	3	4	2	4	3	4	3	3	2	35	3	4	2	2	4	4	19	54	3	1	2	2	4	4	16	97
1042	0	1996-12-16	2017-06-19	20.5065	3003	3	5	0	0	1	3	2	3	4	3	4	4	3	4	27	2	2	3	2	2	3	4	2	3	3	2	28	3	2	2	4	5	4	20	48	4	1	2	2	3	3	15	90
1043	0	1996-12-07	2017-06-19	20.5311	3003	3	3	0	0	1	4	5	3	4	3	4	3	4	4	30	3	1	5	5	3	4	4	5	4	3	2	39	3	2	3	2	3	3	16	55	3	2	2	3	4	5	19	104
1044	0	1996-01-18	2017-06-19	21.4182	3003	3	3	0	0	0	2	3	2	3	3	3	3	3	3	23	1	3	2	1	2	3	3	1	2	2	1	21	1	1	1	1	1	4	9	30	3	2	2	4	3	3	17	70
1045	0	1997-12-10	2017-06-19	19.5236	3003	3	3	0	0	1	4	5	2	4	3	2	1	4	3	24	3	4	3	2	4	5	3	1	4	4	3	36	4	3	4	3	2	5	21	57	2	4	5	5	4	5	25	106
1048	0	1998-01-02	2017-06-19	19.4606	3003	3	3	0	0	1	5	4	5	5	4	3	3	4	3	31	4	4	3	4	2	4	4	3	3	4	4	39	3	2	3	2	2	3	15	54	3	2	3	3	3	4	18	103
1049	0	1996-10-23	2017-06-19	20.6543	3003	3	3	0	0	1	5	3	2	5	3	5	2	4	1	25	2	4	4	3	5	4	5	2	5	5	2	41	4	5	5	5	2	3	24	65	3	3	1	1	1	1	10	100
1050	0	1997-01-20	2017-06-19	20.4107	3003	3	3	0	0	1	4	4	2	3	1	1	4	3	4	22	1	1	2	3	4	1	2	1	3	3	3	24	1	2	1	1	2	2	9	33	3	3	2	2	3	2	15	70
1052	0	1996-12-17	2017-06-14	20.4901	3004	3	3	1	0	1	4	4	3	4	3	3	3	4	3	27	4	4	2	4	5	2	1	1	4	5	4	36	2	3	3	3	2	4	17	53	2	1	2	1	3	2	11	91
1053	0	1995-08-21	2017-06-14	21.8152	3004	3	5	0	0	1	5	4	4	3	3	3	3	4	4	28	3	3	3	4	5	4	4	2	4	5	4	41	4	3	4	4	2	3	20	61	3	3	2	2	4	4	18	107
1054	0	1998-04-24	2017-06-14	19.1403	3004	3	3	0	0	1	3	4	4	4	3	2	1	3	3	24	3	3	4	4	2	5	2	3	4	3	2	35	2	3	2	1	1	4	13	48	2	2	2	3	3	3	15	87
1055	0	1997-07-15	2017-06-14	19.9151	3004	3	3	0	0	1	4	4	2	3	2	3	1	3	2	20	2	2	1	1	5	4	2	1	3	3	4	28	3	4	3	2	1	3	16	44	2	2	3	3	2	3	15	79
1056	0	1997-10-17	2017-06-14	19.6578	3004	3	3	0	0	1	3	4	4	4	4	3	1	5	2	27	3	3	2	4	4	5	5	2	2	3	4	37	2	3	3	1	2	3	14	51	4	2	4	3	4	5	22	100
1057	0	1997-09-30	2017-06-14	19.7043	3004	3	3	0	0	1	4	5	3	4	3	2	3	4	1	25	1	2	1	4	1	2	4	5	4	3	2	29	4	2	1	1	4	3	15	44	2	2	3	4	5	1	17	86
1058	0	1997-10-28	2017-06-14	19.6277	3004	3	3	0	0	1	4	3	2	4	3	2	4	3	2	23	3	3	3	3	1	3	2	4	2	2	2	28	2	1	1	1	2	1	8	36	4	2	2	3	2	4	17	76
1059	0	1996-07-09	2017-06-14	20.9309	3004	3	3	1	0	1	5	5	4	5	4	3	3	5	3	32	5	5	5	5	5	5	5	5	5	5	5	55	5	5	5	5	5	5	30	85	3	2	1	3	2	3	14	131
1060	0	1996-10-06	2017-06-14	20.6872	3004	3	3	0	0	1	4	4	2	3	3	2	2	3	3	22	3	4	2	2	4	4	2	1	3	4	4	33	4	2	3	2	4	4	19	52	3	2	4	4	3	3	19	93
1061	0	1998-01-24	2017-06-14	19.3867	3004	3	3	0	0	1	4	4	4	4	2	4	2	3	2	25	2	3	3	1	4	3	1	2	3	3	2	27	2	2	1	1	1	3	10	37	4	4	2	5	3	5	23	85
1062	0	1997-08-13	2017-06-14	19.8357	3004	3	3	0	0	1	4	4	4	4	4	4	3	3	3	29	2	4	2	3	3	5	2	1	3	2	3	30	1	2	3	2	1	4	13	43	4	3	2	4	4	4	21	93
1064	0	1998-01-08	2017-06-14	19.4305	3004	3	3	0	0	1	4	3	3	3	3	3	5	3	3	26	3	3	2	2	2	3	4	3	3	3	4	32	3	1	3	1	4	4	16	48	4	1	3	3	2	2	15	89
1065	0	1993-05-16	2017-06-14	24.0794	3004	3	3	0	0	1	5	4	3	4	4	3	3	4	3	28	4	4	3	4	4	3	2	4	4	4	4	40	4	2	2	2	4	3	17	57	4	3	3	4	4	4	22	107
1066	0	1993-06-15	2017-06-14	23.9973	3004	3	3	0	0	1	4	5	4	5	4	5	5	5	3	36	3	3	3	3	3	3	5	2	4	3	3	35	3	1	2	1	2	2	11	46	5	3	3	4	2	5	22	104
1067	0	1996-08-13	2017-06-14	20.835	3004	3	3	0	0	1	5	4	4	4	3	2	2	3	2	24	3	4	5	3	1	4	1	1	3	4	4	33	3	2	2	3	1	4	15	48	4	1	3	5	5	5	23	95
1068	0	1994-08-22	2017-06-14	22.8118	3004	3	3	0	0	1	5	5	2	5	5	4	-9	2	3	17	4	3	4	4	5	5	5	4	5	5	4	48	5	5	5	4	3	4	26	74	2	3	4	5	4	3	21	112
1071	0	1997-12-03	2017-06-14	19.5291	3004	3	3	0	0	1	3	4	4	3	3	2	3	3	2	24	4	4	4	5	5	5	5	4	4	5	4	49	5	2	4	3	4	4	22	71	4	2	4	4	3	3	20	115
1073	0	1996-07-01	2017-06-14	20.9528	3004	3	3	0	0	1	5	5	4	5	3	3	2	3	1	26	1	5	5	2	4	4	4	1	3	3	3	35	4	2	3	3	1	3	16	51	2	2	4	3	3	3	17	94
1075	0	1998-03-11	2017-06-14	19.2608	3004	3	3	0	0	1	4	5	3	3	3	2	3	3	2	24	4	4	4	5	4	4	4	4	4	4	3	44	4	4	4	2	2	5	21	65	2	2	3	3	4	3	17	106
1077	0	1997-08-06	2017-06-14	19.8549	3004	3	3	0	0	1	4	5	3	4	4	3	3	4	3	29	2	2	1	2	3	5	3	3	5	2	5	33	2	1	2	3	1	2	11	44	3	2	4	5	2	5	21	94
1078	0	1997-07-18	2017-06-14	19.9069	3004	3	3	0	0	1	4	5	3	5	2	5	2	5	5	32	2	3	3	1	2	5	4	2	4	4	5	35	4	2	3	2	3	4	18	53	4	3	3	4	5	4	23	108
1080	0	1997-01-09	2017-06-14	20.4271	3004	3	3	0	0	1	4	4	3	5	4	3	2	4	2	27	4	3	3	3	4	4	3	2	4	4	3	37	3	3	3	3	3	3	18	55	4	2	3	2	3	2	16	98
1081	0	1996-09-27	2017-06-14	20.7118	3004	3	3	0	0	1	3	4	3	4	3	2	3	4	3	26	3	4	3	3	2	4	2	2	3	2	4	32	3	2	3	1	1	3	13	45	2	2	2	2	3	2	13	84
1082	0	1997-11-03	2017-06-14	19.6112	3004	3	3	0	0	1	4	3	3	3	2	2	4	2	2	21	4	5	3	3	5	5	4	2	2	4	2	39	3	2	2	2	3	4	16	55	1	3	2	2	4	4	16	92
1083	0	1997-10-14	2017-06-14	19.666	3004	3	3	1	1	1	5	5	4	4	4	3	1	4	3	28	4	4	4	4	5	4	4	4	5	5	5	48	5	4	4	2	2	4	21	69	3	2	4	3	3	2	17	114
1084	0	1994-08-12	2017-06-14	22.8392	3004	3	3	0	0	1	4	5	3	3	3	4	4	4	2	28	4	5	2	3	5	4	2	1	4	4	4	38	4	4	4	4	1	3	20	58	4	4	1	-9	5	5	10	96
1085	0	1997-12-13	2017-06-14	19.5017	3004	3	3	0	0	1	5	5	4	4	5	2	3	4	2	29	4	2	1	3	1	3	2	1	5	4	4	30	1	2	2	2	1	2	10	40	5	3	3	4	1	4	20	89
1087	0	1997-09-16	2017-06-14	19.7426	3004	3	3	0	0	1	5	5	4	5	5	3	4	5	5	36	4	5	5	5	5	5	5	5	5	5	5	54	5	5	5	4	4	5	28	82	4	3	3	3	2	5	20	138
1088	0	1998-01-06	2017-06-14	19.436	3004	3	3	0	0	1	5	5	3	5	3	3	4	5	3	31	1	2	5	2	5	5	5	1	4	5	2	37	4	2	2	1	2	3	14	51	4	2	3	4	1	3	17	99
1090	0	1998-02-16	2017-06-14	19.3238	3004	3	3	0	0	1	4	3	3	3	2	4	1	4	3	23	2	4	3	2	4	4	2	2	4	3	1	31	2	2	3	3	2	2	14	45	3	3	4	4	3	2	19	87
1092	0	1996-05-25	2017-06-14	21.0541	3004	3	3	1	0	1	5	4	2	3	3	3	2	3	3	23	4	4	2	2	5	5	3	4	5	5	5	44	5	3	3	2	3	3	19	63	3	2	2	2	2	3	14	100
1093	0	1995-10-24	2017-06-14	21.64	3004	3	3	0	0	1	4	4	3	5	5	4	3	5	3	32	4	4	4	4	3	5	4	2	4	4	4	42	4	4	4	3	2	3	20	62	3	3	4	3	4	5	22	116
1094	0	1994-09-18	2017-06-14	22.7379	3004	3	3	0	0	1	3	4	2	4	3	4	2	4	5	28	4	5	4	4	1	4	4	5	4	2	5	42	2	2	4	3	3	5	19	61	2	1	2	3	1	1	10	99
1095	0	1997-08-15	2017-06-14	19.8303	3004	3	3	0	0	1	5	5	4	5	4	4	5	4	4	35	4	5	4	5	3	4	5	5	4	5	3	47	5	4	5	4	3	4	25	72	3	2	2	1	2	4	14	121
1096	0	1998-06-22	2017-06-14	18.9788	3004	3	3	0	0	1	2	5	4	5	4	5	3	5	3	34	2	3	3	2	1	4	3	3	3	2	2	28	2	1	1	2	1	3	10	38	3	2	4	4	2	4	19	91
1097	0	1997-10-24	2017-06-14	19.6386	3004	3	3	1	1	1	4	5	2	3	3	3	4	5	2	27	3	4	2	3	5	5	2	3	5	5	3	40	3	3	3	2	1	3	15	55	1	4	5	5	1	2	18	100
1098	0	1996-08-07	2017-06-14	20.8515	3004	3	3	0	0	1	5	4	3	5	4	3	2	3	4	28	4	5	2	1	5	5	3	1	5	3	2	36	4	3	1	3	5	4	20	56	3	2	3	4	3	5	20	104
1100	0	1996-11-26	2017-06-14	20.5476	3004	3	3	0	0	1	4	5	3	4	3	3	5	4	1	28	3	4	4	4	1	3	4	1	3	2	5	34	2	3	4	2	1	3	15	49	3	3	4	3	3	3	19	96
1101	0	1997-12-08	2017-06-14	19.5154	3004	3	3	0	0	1	5	5	2	4	3	4	2	4	2	26	3	5	3	3	4	5	4	2	5	3	3	40	3	4	4	3	2	4	20	60	2	2	2	3	4	4	17	103
1102	0	1996-03-01	2017-06-12	21.2813	3004	3	5	0	0	1	4	4	2	3	2	2	1	3	1	18	3	5	3	5	4	3	5	4	3	3	2	40	2	1	2	3	3	2	13	53	4	2	2	4	4	4	20	91
1103	0	1995-12-07	2017-06-12	21.514	3004	3	7	0	0	1	3	3	1	2	2	2	2	3	2	17	4	2	3	3	1	2	3	3	3	3	2	29	2	1	3	3	4	1	14	43	5	2	3	3	4	2	19	79
1104	0	1992-10-16	2017-06-12	24.6543	3004	3	5	0	0	1	4	4	2	4	4	2	2	4	2	24	5	3	4	5	1	3	5	1	4	5	5	41	3	2	3	1	1	2	12	53	3	4	5	5	4	5	26	103
1105	0	1995-10-03	2017-06-12	21.692	3004	3	5	0	0	1	3	3	2	3	3	3	1	3	3	21	3	3	2	2	1	1	2	3	2	2	3	24	1	2	3	3	2	1	12	36	3	2	2	2	4	5	18	75
1107	0	1997-05-14	2017-06-12	20.0794	3004	3	5	1	0	1	3	2	3	2	2	3	3	3	3	21	2	5	4	2	2	5	4	2	2	5	4	37	5	3	4	2	5	3	22	59	2	2	2	2	2	2	12	92
1108	0	1995-08-17	2017-06-12	21.8207	3004	3	5	0	0	1	5	4	4	3	2	2	3	3	4	25	3	3	4	4	3	3	4	2	4	2	2	34	2	4	4	4	2	4	20	54	4	2	3	3	3	2	17	96
1109	0	1996-09-26	2017-06-12	20.7091	3004	3	5	0	0	1	4	4	2	4	2	3	3	4	2	24	3	4	2	3	5	4	2	1	3	4	4	35	4	4	4	2	3	4	21	56	2	2	3	4	3	2	16	96
1110	0	1988-05-31	2017-06-12	29.0322	3004	3	5	0	0	1	4	4	3	3	3	2	3	4	2	24	3	3	4	3	4	3	4	3	3	4	4	38	2	2	2	2	2	3	13	51	3	2	4	4	4	3	20	95
1111	0	1996-01-08	2017-06-12	21.4264	3004	3	5	0	0	1	3	3	3	3	1	2	3	4	3	22	2	1	1	3	1	2	3	1	1	2	2	19	1	1	1	1	1	2	7	26	4	3	5	5	5	5	27	75
1112	0	1995-11-08	2017-06-12	21.5934	3004	3	5	0	0	1	4	3	3	4	3	2	2	4	2	23	3	5	5	5	5	4	4	3	4	3	3	44	4	5	5	5	5	5	29	73	2	1	1	2	4	3	13	109
1113	0	1996-10-02	2017-06-12	20.6927	3004	3	5	0	0	1	4	5	5	5	4	2	1	4	1	27	5	5	4	1	5	5	5	1	5	4	5	45	4	2	1	3	1	4	15	60	5	1	3	2	1	4	16	103
1114	0	1996-11-05	2017-06-12	20.5996	3004	3	5	0	0	1	3	2	3	3	2	-9	2	3	3	9	1	1	3	1	1	2	3	1	2	3	2	20	3	2	2	1	3	3	14	34	2	1	4	4	5	3	19	62
1115	0	1997-02-06	2017-06-12	20.345	3004	3	5	0	0	1	4	4	3	3	3	3	2	2	2	22	2	3	3	4	5	3	4	1	3	2	3	33	2	2	3	3	1	2	13	46	3	3	2	2	1	1	12	80
1116	0	1995-11-24	2017-06-12	21.5496	3004	3	5	0	0	1	4	5	3	4	4	3	3	4	3	29	4	4	3	2	3	4	3	2	4	4	3	36	4	3	3	2	4	3	19	55	4	2	2	2	4	3	17	101
1117	0	1996-12-04	2017-06-12	20.5202	3004	3	5	0	0	1	5	4	2	3	1	1	1	1	2	15	3	4	3	4	4	2	4	1	4	2	4	35	4	2	4	1	4	5	20	55	3	2	5	4	4	4	22	92
1118	0	1996-06-17	2017-06-12	20.9856	3004	3	5	0	0	1	4	5	2	5	5	3	4	5	2	31	4	4	3	5	2	4	1	1	5	5	3	37	3	2	2	1	4	5	17	54	3	1	5	3	1	1	14	99
1119	0	1992-01-14	2017-06-12	25.41	3004	3	5	0	0	1	5	4	2	3	3	3	2	4	2	23	2	4	3	3	3	4	4	4	4	2	2	35	2	3	3	2	3	2	15	50	4	2	3	4	3	3	19	92
1120	0	1992-01-19	2017-06-12	25.3963	3004	3	5	0	0	1	3	3	3	3	2	-9	3	2	3	10	2	2	3	2	1	3	3	1	3	2	2	24	2	2	2	2	1	2	11	35	4	5	5	5	3	5	27	72
1121	0	1996-08-23	2017-06-12	20.8022	3004	3	5	0	0	1	3	3	2	4	4	2	-9	4	3	13	3	2	-9	1	3	2	2	1	4	3	2	14	1	1	2	2	1	2	9	23	3	1	5	2	5	5	21	57
1122	0	1992-02-14	2017-06-12	25.3251	3004	3	5	0	0	1	5	4	3	4	3	3	3	4	5	29	3	3	3	4	1	4	4	1	4	4	2	33	3	3	2	2	2	3	15	48	3	2	3	2	4	3	17	94
1124	0	1994-04-15	2017-06-12	23.1595	3004	3	5	0	0	1	5	4	1	4	5	5	5	3	1	28	3	4	2	1	5	4	3	1	4	5	5	37	3	1	4	3	1	4	16	53	2	1	2	2	5	5	17	98
1125	0	1996-05-10	2017-06-12	21.0897	3004	3	5	0	0	1	4	3	2	4	-9	2	3	3	3	11	3	4	1	2	4	5	5	2	4	4	4	38	4	3	3	2	1	3	16	54	3	2	4	3	5	4	21	86
1126	0	1996-09-23	2017-06-12	20.7173	3004	3	5	0	0	1	4	5	3	5	4	3	4	5	3	32	4	5	3	5	1	4	4	3	4	4	5	42	3	3	2	3	3	5	19	61	4	5	5	5	4	5	28	121
3	1	1995-09-20	2017-06-02	21.7002	1001	1	3	0	0	1	5	3	4	5	4	5	5	4	4	34	4	4	3	3	5	4	3	1	4	4	5	40	5	3	3	2	3	5	21	61	4	1	2	4	2	1	14	109
8	1	1997-11-12	2017-06-02	19.5537	1001	1	3	0	0	1	4	3	3	4	3	5	2	3	2	25	2	2	3	3	3	3	3	3	4	4	1	31	2	1	4	2	2	1	12	43	3	2	2	1	1	1	10	78
10	1	1997-11-04	2017-06-02	19.5756	1001	1	3	0	0	0	3	3	1	2	3	1	2	3	1	16	1	1	3	2	1	2	2	1	3	1	1	18	2	1	1	1	1	1	7	25	4	3	4	4	3	4	22	63
16	1	1997-09-19	2017-06-02	19.7016	1001	1	3	0	0	1	3	3	3	3	3	3	2	3	2	22	3	2	2	3	3	2	2	1	2	2	2	24	2	1	1	1	1	2	8	32	3	3	3	3	3	3	18	72
17	1	1994-07-17	2017-06-02	22.8775	1001	1	3	0	0	1	3	4	2	3	3	2	3	2	3	22	1	1	1	2	1	4	1	1	3	2	1	18	2	1	1	1	1	2	8	26	1	1	1	3	5	3	14	62
23	1	1997-11-21	2017-06-02	19.5291	1001	1	3	0	0	1	3	3	2	3	3	1	1	2	1	16	4	2	1	2	5	3	2	1	4	4	4	32	1	1	2	1	2	2	9	41	2	1	1	4	4	3	15	72
27	1	1997-10-18	2017-06-02	19.6222	1001	1	3	0	0	1	4	4	3	3	3	3	3	4	3	26	3	3	5	4	3	2	2	2	4	3	2	33	4	2	2	1	1	2	12	45	4	1	2	3	5	3	18	89
29	1	1997-08-29	2017-06-02	19.7591	1001	1	3	0	0	1	3	3	2	3	2	3	2	2	2	19	2	2	2	2	3	3	2	1	2	1	2	22	2	2	2	1	1	2	10	32	2	1	1	2	5	4	15	66
30	1	1998-02-20	2017-06-02	19.2799	1001	1	3	0	0	1	5	5	3	5	4	5	4	5	4	35	1	4	3	1	4	4	5	1	5	4	3	35	2	3	1	2	3	3	14	49	5	2	2	2	3	2	16	100
34	1	1994-08-01	2017-06-02	22.8364	1001	1	3	0	0	1	4	4	2	5	3	4	2	4	3	27	4	4	5	4	4	2	3	1	3	3	4	37	2	4	4	3	4	4	21	58	3	2	4	5	4	4	22	107
36	1	1992-03-31	2017-06-02	25.1718	1001	1	3	0	0	1	4	3	2	4	2	3	3	3	3	23	2	4	3	3	1	4	2	1	4	4	3	31	3	2	3	3	3	4	18	49	4	3	3	4	4	4	22	94
39	1	1997-08-13	2017-06-02	19.8029	1001	1	3	0	0	1	4	5	2	3	3	3	2	5	1	24	3	3	2	1	4	4	4	1	3	2	2	29	2	2	3	2	3	4	16	45	3	4	2	4	4	2	19	88
43	1	1997-12-26	2017-12-26	20	1001	1	3	0	0	1	4	3	3	4	3	2	1	2	2	20	2	2	3	1	2	2	1	3	3	2	2	23	2	3	2	2	1	4	14	37	3	2	5	5	5	4	24	81
49	1	1990-01-26	2017-06-05	27.3566	1002	1	5	0	0	1	4	4	4	4	4	3	3	3	3	28	3	3	1	3	2	4	1	1	3	3	4	28	3	3	2	3	3	3	17	45	4	3	4	3	4	4	22	95
50	1	1997-03-31	2017-06-05	20.1807	1002	1	5	0	0	1	5	4	4	4	4	4	5	5	5	35	3	4	4	4	4	4	1	1	4	4	3	36	2	2	1	1	1	2	9	45	4	3	4	3	4	2	20	100
51	1	1997-03-03	2017-06-05	20.2574	1002	1	5	0	0	1	4	4	3	5	4	4	5	4	3	32	2	1	1	1	3	2	1	1	3	2	4	21	1	3	2	3	3	3	15	36	4	1	3	3	2	3	16	84
55	1	1996-11-05	2017-06-05	20.5804	1002	1	5	0	0	1	4	4	3	3	3	3	2	4	2	24	2	4	3	2	3	4	4	3	2	3	3	33	3	2	2	1	2	3	13	46	3	2	3	3	4	4	19	89
59	1	1996-01-17	2017-06-05	21.3826	1002	1	5	0	0	1	3	3	3	2	3	3	4	3	3	24	1	2	2	1	1	3	2	1	1	2	2	18	2	3	2	2	3	1	13	31	5	2	3	2	4	4	20	75
61	1	1996-10-04	2017-06-05	20.668	1002	1	5	0	0	1	5	5	4	4	4	3	5	4	4	33	2	3	1	3	4	5	1	1	5	4	1	30	4	4	2	1	2	3	16	46	4	4	5	5	2	2	22	101
62	1	1993-08-05	2017-06-08	23.8412	1003	1	5	0	0	1	3	4	5	-9	4	5	3	4	5	21	1	3	4	4	2	3	3	2	3	3	2	30	2	2	1	1	2	2	10	40	3	3	3	3	4	4	20	81
63	1	1996-06-27	2017-06-08	20.9473	1003	1	5	1	0	1	4	3	3	4	4	3	4	4	3	28	5	5	4	4	5	5	5	2	4	5	3	47	4	2	2	2	3	3	16	63	3	2	2	4	5	4	20	111
64	1	1996-10-21	2017-06-08	20.6297	1003	1	5	0	0	1	4	3	2	3	2	2	2	2	2	18	2	2	3	3	3	2	2	3	2	2	3	27	2	1	2	1	2	2	10	37	5	3	3	4	3	5	23	78
65	1	1994-01-30	2017-06-08	23.3539	1003	1	5			1	3	3	4	4	3	3	3	3	1	24	4	3	2	1	2	2	3	1	3	2	4	27	2	1	2	2	1	2	10	37	3	2	1	4	2	2	14	75
67	1	1995-06-17	2017-06-08	21.9767	1003	1	5	0	0	1	4	3	3	2	2	3	3	2	4	22	1	2	1	1	1	3	2	1	3	3	3	21	3	2	2	2	2	3	14	35	2	2	1	4	5	5	19	76
75	1	1994-09-16	2017-06-12	22.7379	1004	1	5	0	0	1	4	4	2	4	3	3	5	3	2	26	3	3	1	2	3	4	2	2	3	2	4	29	1	3	2	2	3	4	15	44	2	2	3	1	4	2	14	84
79	1	1996-07-08	2017-06-06	20.9117	1004	1	5	0	0	1	2	4	3	4	2	4	1	2	2	22	1	1	1	1	1	1	1	1	2	2	3	15	1	2	1	1	1	2	8	23	2	2	2	4	4	4	18	63
82	1	1996-12-11	2017-06-06	20.4846	1004	1	5	0	0	1	5	4	2	3	2	4	2	3	2	22	3	4	3	2	1	3	4	2	3	4	4	33	2	2	2	2	5	3	16	49	5	2	2	4	5	5	23	94
85	1	1995-07-15	2017-06-12	21.911	1004	1	5	0	0	1	4	4	2	4	4	4	3	3	2	26	2	4	1	2	1	2	2	2	3	3	1	23	3	4	4	2	3	4	20	43	2	4	2	2	3	3	16	85
89	1	1997-02-04	2017-06-27	20.3915	1005	1	5	0	0	1	5	5	3	5	3	2	3	3	2	26	5	5	4	5	5	3	4	5	5	5	4	50	5	3	3	4	5	5	25	75	5	1	3	3	1	3	16	117
92	1	1990-08-03	2017-06-27	26.8994	1005	1	5	0	0	1	3	3	4	4	3	3	3	3	2	25	2	3	2	3	2	3	3	3	3	2	4	30	3	2	2	2	2	2	13	43	2	3	3	3	3	3	17	85
95	1	1990-10-25	2017-06-27	26.6721	1005	1	5	1	0	1	5	5	4	4	2	5	3	4	5	32	3	4	4	4	5	5	2	2	4	4	5	42	4	2	2	1	4	3	16	58	4	2	2	5	5	2	20	110
100	1	1996-10-16	2017-06-27	20.6954	1005	1	5	0	0	1	5	4	4	3	3	2	2	5	3	26	5	3	4	1	2	5	2	2	4	4	2	34	4	4	3	5	2	3	21	55	3	3	3	5	4	4	22	103
101	1	1997-02-17	2017-06-27	20.3559	1005	1	5	0	0	1	5	4	5	3	3	3	3	4	3	28	4	3	4	3	2	2	3	2	4	4	3	34	4	4	4	4	3	4	23	57	4	4	3	4	2	2	19	104
102	1	1995-10-07	2017-06-27	21.7221	1005	1	5	1	0	1	3	4	4	3	4	2	2	4	3	26	4	4	3	5	3	5	4	4	4	4	3	43	3	2	2	2	2	4	15	58	5	4	3	4	4	3	23	107
124	1	1995-08-22	2017-06-02	21.7796	1006	1	5	0	0	1	3	3	3	3	3	2	3	2	2	21	2	3	2	2	3	4	1	1	3	3	2	26	2	3	3	2	4	4	18	44	3	3	5	4	4	4	23	88
131	1	1996-07-04	2017-06-02	20.9117	1006	1	5	0	0	1	5	5	4	4	4	5	3	4	5	34	4	5	4	2	2	4	5	2	4	4	5	41	4	1	1	1	2	4	13	54	3	4	1	3	5	3	19	107
147	1	1988-07-06	2017-06-02	28.9062	1006	1	5	0	0	1	4	4	3	4	2	3	5	3	2	26	4	3	3	2	2	3	4	2	4	3	5	35	4	4	4	4	4	4	24	59	4	2	2	3	2	2	15	100
149	1	1994-12-05	2017-06-02	22.4914	1006	1	5	0	0	1	5	3	4	5	3	4	1	3	5	28	4	4	4	5	5	4	4	1	5	5	4	45	4	2	2	2	4	4	18	63	4	1	1	1	4	1	12	103
157	1	1996-10-01	2017-06-07	20.6817	1006	1	3	0	0	1	4	5	3	5	5	5	5	5	3	36	3	2	3	5	4	4	3	2	4	4	4	38	3	4	4	3	2	4	20	58	5	4	4	4	5	4	26	120
158	1	1997-06-05	2017-06-07	20.0055	1006	1	3	0	0	1	4	3	2	3	2	3	1	2	2	18	4	1	3	2	1	3	2	1	3	2	3	25	2	3	2	3	3	3	16	41	3	2	3	2	4	4	18	77
182	1	1997-04-25	2017-06-07	20.1177	1006	1	3	0	0	1	3	3	3	3	3	2	2	4	2	22	3	2	2	3	3	3	3	2	3	3	4	31	2	2	3	2	3	3	15	46	4	2	4	4	5	5	24	92
188	1	1994-04-09	2017-06-19	23.1951	1007	1	3	0	0	1	3	5	3	4	3	3	2	4	3	27	2	4	2	1	2	4	1	1	3	1	2	23	3	1	1	1	1	3	10	33	4	2	4	3	5	5	23	83
190	1	1998-06-07	2017-06-19	19.0335	1007	1	3	0	0	1	5	4	2	5	4	2	2	4	2	25	4	3	3	2	5	5	4	5	4	5	5	45	3	3	3	3	3	3	18	63	4	2	2	3	3	2	16	104
191	1	1998-01-13	2017-06-19	19.4305	1007	1	3	0	0	1	4	4	2	3	3	3	2	2	1	20	3	3	3	4	5	5	3	1	3	2	3	35	2	2	1	3	3	3	14	49	4	2	1	1	5	5	18	87
194	1	1998-01-03	2017-06-19	19.4579	1007	1	3	0	0	1	3	1	-9	5	3	3	5	5	4	17	3	5	3	1	2	5	3	1	3	2	4	32	4	4	5	5	5	4	27	59	4	2	3	2	4	2	17	93
195	1	1995-05-06	2017-06-19	22.1218	1007	1	3	1	0	1	5	4	5	4	3	3	3	3	3	28	4	4	4	4	5	4	4	4	5	4	3	45	4	4	4	3	3	5	23	68	3	2	2	1	1	1	10	106
202	1	1998-01-22	2017-06-19	19.4059	1007	1	3	0	0	1	3	4	3	4	4	3	2	3	2	25	1	3	2	1	2	3	1	1	3	2	1	20	3	3	2	3	3	3	17	37	3	1	3	2	5	4	18	80
206	1	1992-04-03	2017-06-19	25.2101	1007	1	3	0	0	1	4	5	3	3	3	2	3	5	1	25	3	4	2	2	1	4	3	3	3	3	3	31	2	4	3	3	2	3	17	48	2	3	4	5	5	5	24	97
211	1	1997-08-19	2017-06-19	19.833	1007	1	3	0	0	1	4	4	2	5	4	3	4	-9	3	16	4	4	4	4	3	5	3	2	3	2	3	37	2	3	2	3	2	4	16	53	3	1	2	5	4	4	19	88
212	1	1998-04-07	2017-06-19	19.2005	1007	1	3	0	0	1	4	3	3	3	2	3	2	3	2	21	1	2	1	1	3	2	1	1	1	3	1	17	2	1	2	2	2	3	12	29	2	2	2	2	4	3	15	65
214	1	1997-12-03	2017-06-19	19.5428	1007	1	3	0	0	1	3	3	2	4	4	3	2	2	1	21	1	3	1	1	4	2	2	1	2	3	1	21	2	1	1	1	1	2	8	29	3	2	1	3	5	5	19	69
216	1	1997-07-26	2017-06-19	19.8987	1007	1	3	0	0	1	3	3	2	3	2	3	2	3	1	19	1	2	3	1	1	2	1	1	1	2	3	18	2	2	3	2	1	2	12	30	3	5	3	4	4	4	23	72
217	1	1997-08-29	2017-06-19	19.8056	1007	1	3	0	0	1	4	3	2	4	2	4	1	5	3	24	3	4	3	1	2	5	5	1	4	2	4	34	3	4	4	2	2	3	18	52	3	1	3	4	5	1	17	93
218	1	1996-06-19	2017-06-19	20.9993	1007	1	3	0	0	1	5	3	1	5	3	1	1	5	1	20	1	1	1	2	4	2	5	1	1	2	4	24	2	5	5	4	2	4	22	46	4	2	5	5	5	3	24	90
220	1	1996-02-13	2017-06-19	21.347	1007	1	3	1	0	1	4	1	1	1	1	1	1	1	1	8	1	4	1	2	5	4	5	1	1	3	5	32	5	4	2	1	5	4	21	53	5	5	4	5	4	4	27	88
221	1	1998-03-23	2017-06-19	19.2416	1007	1	3	0	0	1	5	4	2	3	2	4	3	2	1	21	1	3	3	1	1	3	2	4	2	1	1	22	4	3	4	3	4	2	20	42	4	4	4	2	4	5	23	86
222	1	1997-08-10	2017-06-19	19.8576	1007	1	3	0	0	1	5	2	4	3	2	3	2	2	3	21	2	2	3	1	1	1	2	2	3	5	1	23	5	4	2	2	2	2	17	40	4	2	1	1	2	5	15	76
225	1	1991-01-26	2017-06-19	26.3956	1007	1	3	0	0	1	4	4	1	3	3	4	5	3	3	26	3	3	2	2	3	3	1	1	3	3	3	27	3	3	3	2	2	4	17	44	3	2	3	2	4	2	16	86
229	1	1997-11-25	2017-06-19	19.5647	1007	1	3	0	0	1	4	4	4	4	3	3	3	4	4	29	3	4	1	1	1	5	1	1	3	2	4	26	3	2	1	1	3	1	11	37	2	1	4	3	4	2	16	82
236	1	1997-10-05	2017-06-19	19.7043	1007	1	3	0	0	1	4	3	3	3	2	4	2	2	1	20	3	2	2	2	4	4	2	1	3	4	4	31	3	1	2	2	2	2	12	43	2	1	2	3	3	4	15	78
237	1	1996-02-04	2017-06-19	21.3717	1007	1	3	0	0	1	4	3	3	3	3	4	3	4	4	27	4	4	3	3	1	4	3	2	4	3	4	35	4	3	2	1	3	3	16	51	3	2	2	1	3	1	12	90
238	1	1997-12-24	2017-06-19	19.4853	1007	1	3	0	0	1	4	3	2	4	4	3	3	3	3	25	4	2	3	1	2	2	2	1	2	2	2	23	2	3	2	2	3	3	15	38	4	3	2	3	4	4	20	83
246	1	1995-09-07	2017-06-12	21.7632	1008	1	5	0	0	1	3	3	3	4	2	4	2	2	1	21	3	2	1	2	4	2	2	3	4	4	4	31	2	3	5	2	2	3	17	48	1	1	2	4	5	4	17	86
257	1	1997-12-25	2017-06-15	19.4716	1008	1	3	0	0	1	4	5	4	5	4	3	4	5	2	32	3	4	2	2	2	5	3	1	3	4	4	33	5	4	4	3	3	5	24	57	4	2	4	5	5	2	22	111
258	1	1998-02-19	2017-06-15	19.3183	1008	1	3	0	0	1	5	4	4	5	4	4	2	3	2	28	4	4	3	3	3	3	3	1	4	4	4	36	4	3	3	2	2	3	17	53	4	5	3	5	3	2	22	103
267	1	1997-07-06	2017-06-15	19.9425	1008	1	3	0	0	1	5	5	4	5	4	4	-9	4	2	19	4	4	3	3	5	5	3	1	4	4	4	40	4	3	2	3	1	3	16	56	4	2	3	3	3	5	20	95
277	1	1997-03-21	2017-06-12	20.2272	1008	1	5	0	0	1	3	4	2	4	3	2	2	3	2	22	2	1	1	1	3	2	1	1	3	2	2	19	2	4	4	2	3	2	17	36	4	3	2	3	5	3	20	78
279	1	1982-08-05	2017-06-12	34.8528	1008	1	5	0	0	1	4	4	3	4	4	2	2	3	3	25	3	4	2	3	-9	2	3	1	4	3	3	19	2	2	2	2	1	1	10	29	3	4	4	5	5	5	26	80
283	1	1996-09-30	2017-06-12	20.6982	1008	1	5	1	0	1	5	4	4	4	3	2	2	3	1	23	3	2	2	3	1	2	2	1	4	3	2	25	3	3	3	3	2	4	18	43	3	3	4	2	3	3	18	84
284	1	1996-11-06	2017-06-12	20.5969	1008	1	5	0	0	1	3	4	4	3	3	3	2	3	2	24	5	3	4	2	3	2	3	3	4	3	4	36	4	2	1	2	4	5	18	54	3	2	3	4	4	2	18	96
287	1	1995-04-16	2017-06-12	22.1574	1008	1	5	0	0	1	3	3	2	4	4	5	5	2	1	26	2	1	2	2	2	3	1	1	4	2	4	24	1	1	1	1	1	3	8	32	1	3	2	2	2	3	13	71
306	1	1994-08-02	2017-06-19	22.8802	1009	1	3	0	0	1	2	4	2	4	3	3	3	3	2	24	3	3	2	1	1	3	1	1	1	1	1	18	1	1	1	1	1	1	6	24	1	1	1	2	2	1	8	56
307	1	1995-09-11	2017-06-19	21.7714	1009	1	3	0	0	1	5	3	2	3	2	3	3	3	2	21	3	2	3	3	3	3	3	1	3	4	2	30	4	1	4	1	3	2	15	45	5	4	2	4	3	3	21	87
311	1	1991-12-24	2017-06-19	25.4867	1009	1	3	0	0	1	5	5	5	5	5	5	3	5	5	38	5	3	4	3	3	5	3	5	5	5	3	44	5	3	4	2	4	5	23	67	4	1	3	1	1	5	15	120
316	1	1995-07-25	2017-06-19	21.9028	1009	1	3	0	0	0	3	3	2	3	2	3	2	2	2	19	2	3	3	3	4	4	3	2	2	2	2	30	2	3	3	2	3	3	16	46	3	2	1	2	3	2	13	78
320	1	1988-02-11	2017-06-19	29.3525	1009	1	3	0	0	1	3	1	1	4	1	3	1	1	1	13	2	3	1	1	2	1	1	1	1	2	1	16	2	1	1	1	4	1	10	26	1	1	3	3	1	1	10	49
322	1	1997-06-20	2017-06-19	19.9973	1009	1	3	0	0	1	4	4	2	2	1	3	3	3	3	21	2	1	3	1	4	4	3	1	4	3	3	29	3	3	3	3	4	3	19	48	2	1	3	1	4	4	15	84
323	1	1998-03-17	2017-06-19	19.258	1009	1	3	0	0	1	4	4	3	4	3	5	3	2	3	27	3	4	4	3	4	4	2	1	3	2	3	33	3	3	3	2	1	3	15	48	4	3	3	2	3	4	19	94
324	1	1995-10-13	2017-06-19	21.6838	1009	1	3	0	0	1	-9	3	3	3	2	3	2	2	2	20	1	4	1	2	4	2	1	1	3	3	3	25	3	3	2	2	2	3	15	40	3	2	2	2	5	3	17	77
326	1	1995-09-22	2017-06-19	21.7413	1009	1	3	1	0	1	4	4	3	4	2	4	2	2	1	22	3	4	4	4	4	4	4	1	5	3	4	40	3	4	5	1	4	4	21	61	2	3	3	3	4	3	18	101
328	1	1997-06-09	2017-06-19	20.0274	1009	1	3	0	0	1	3	3	4	3	2	1	1	2	1	17	3	2	3	2	3	3	2	2	3	1	3	27	1	3	1	2	1	1	9	36	5	5	4	5	1	5	25	78
329	1	1996-08-11	2017-06-19	20.8542	1009	1	5	0	0	1	4	4	2	5	5	5	3	3	5	32	2	3	2	2	2	4	2	2	4	2	2	27	2	2	2	2	2	2	12	39	2	1	3	2	3	3	14	85
330	1	1995-12-01	2017-06-19	21.5496	1009	1	3	0	0	1	5	4	2	4	4	5	5	5	4	33	3	4	3	4	3	4	3	2	4	4	2	36	4	2	3	2	2	3	16	52	2	-9	2	2	3	3	3	88
331	1	1996-12-07	2017-06-19	20.5311	1009	1	3	0	0	1	3	3	3	3	2	2	3	3	3	22	1	3	3	3	4	2	2	1	2	3	2	26	2	1	1	1	2	2	9	35	4	3	3	3	4	5	22	79
337	1	1991-04-02	2017-06-19	26.2149	1009	1	3	0	0	1	3	3	3	4	3	4	3	4	3	27	3	3	2	2	2	3	2	3	2	2	2	26	3	2	2	2	3	3	15	41	4	2	3	3	3	3	18	86
338	1	1997-02-25	2017-06-19	20.3121	1009	1	3	0	0	1	5	3	3	3	3	3	4	5	2	26	5	4	4	4	4	4	3	1	4	2	3	38	3	3	1	1	1	2	11	49	3	3	3	3	4	4	20	95
341	1	1996-09-06	2017-06-19	20.783	1009	1	3	0	0	1	2	3	3	4	3	3	3	2	2	23	3	2	3	3	2	3	2	3	3	3	2	29	3	3	2	2	2	2	14	43	2	3	2	2	4	4	17	83
342	1	1998-03-31	2017-06-19	19.2197	1009	1	3	0	0	1	4	4	3	3	2	5	4	5	3	29	2	3	3	1	1	4	2	1	1	1	2	21	3	1	1	1	3	3	12	33	2	1	1	2	3	5	14	76
345	1	1989-10-17	2017-06-19	27.6715	1009	1	5	0	0	1	5	4	3	5	2	3	5	3	5	30	3	4	3	3	4	4	2	2	5	5	1	36	5	4	4	3	2	3	21	57	2	2	3	2	4	4	17	104
346	1	1997-12-12	2017-06-19	19.5181	1009	1	3	0	0	1	5	4	4	5	2	4	5	2	5	31	4	4	3	4	5	5	4	1	4	4	4	42	4	3	4	2	3	3	19	61	2	1	4	3	3	2	15	107
349	1	1997-07-14	2017-06-19	19.9316	1009	1	3	0	0	1	4	4	3	3	2	2	2	2	4	22	4	4	3	3	1	4	5	1	5	5	5	40	5	4	1	4	1	1	16	56	5	2	4	5	3	1	20	98
350	1	1997-05-11	2017-06-19	20.1068	1009	1	3	0	0	1	4	4	3	5	3	3	2	4	1	25	4	5	4	3	1	4	1	1	4	3	5	35	4	3	3	2	3	5	20	55	2	3	4	4	5	3	21	101
352	1	1997-09-17	2017-06-19	19.7536	1009	1	3	0	0	0	1	3	2	3	3	3	2	2	2	20	2	2	3	3	2	3	4	2	1	2	1	25	3	1	2	2	1	3	12	37	2	2	2	3	5	5	19	76
355	1	1996-11-14	2017-06-19	20.5941	1009	1	3	0	0	1	5	3	3	4	2	4	3	3	3	25	3	4	4	3	5	4	3	3	4	4	4	41	5	4	5	3	4	4	25	66	3	2	2	3	4	4	18	109
358	1	1997-01-24	2017-06-19	20.3997	1009	1	3	0	0	1	4	4	4	5	1	5	1	4	4	28	1	1	1	1	4	1	1	1	4	3	1	19	1	1	1	1	4	2	10	29	5	4	4	5	5	5	28	85
360	1	1997-12-03	2017-06-19	19.5428	1009	1	3	0	0	0	1	3	3	3	1	4	2	2	4	22	1	1	3	1	1	3	1	1	2	1	1	16	1	1	1	1	1	1	6	22	4	2	1	4	3	4	18	62
361	1	1992-06-11	2017-06-19	25.0212	1009	1	3	0	0	1	5	3	3	5	3	3	2	3	3	25	3	4	2	1	5	5	2	2	3	3	3	33	1	3	2	1	1	1	9	42	3	1	4	3	5	4	20	87
365	1	1997-09-17	2017-06-19	19.7536	1009	1	3	0	0	1	4	4	3	4	3	4	3	4	2	27	4	4	3	4	3	4	4	2	4	3	4	39	3	2	3	2	2	3	15	54	2	2	2	2	4	4	16	97
368	1	1995-06-26	2017-06-19	21.9822	1009	1	5	0	0	1	1	2	3	2	1	1	3	2	2	16	2	5	2	2	4	3	2	2	3	2	2	29	2	2	2	1	3	2	12	41	3	2	4	3	5	2	19	76
372	1	1997-03-29	2017-06-19	20.2245	1009	1	5	0	0	1	4	4	2	4	2	3	2	4	2	23	4	4	3	5	2	4	2	1	4	3	4	36	4	2	1	2	3	3	15	51	3	1	1	1	3	3	12	86
380	1	1997-04-13	2017-06-19	20.1834	1009	1	5	0	0	1	5	4	3	5	5	2	3	4	4	30	5	5	2	4	4	5	1	1	5	5	5	42	3	5	4	3	5	4	24	66	3	1	5	4	2	4	19	115
381	1	1994-12-19	2017-06-19	22.4997	1009	1	5	0	0	1	3	4	2	3	2	2	3	2	2	20	3	2	3	2	1	3	1	1	3	2	1	22	2	1	1	1	1	2	8	30	3	1	1	3	2	3	13	63
382	1	1997-06-12	2017-06-19	20.0192	1009	1	5	1	1	1	3	3	2	1	2	2	1	2	2	15	3	4	4	2	1	3	2	1	2	3	4	29	4	2	3	1	4	3	17	46	2	1	2	2	3	2	12	73
384	1	1995-11-05	2017-06-19	21.6208	1009	1	5	0	0	1	5	4	3	3	4	4	3	4	3	28	3	4	2	4	3	4	3	3	5	4	4	39	3	3	3	3	2	3	17	56	2	2	3	4	5	4	20	104
389	1	1994-12-27	2017-06-19	22.4778	1009	1	5	0	0	1	5	3	2	4	2	3	4	2	4	24	3	2	2	1	1	2	3	1	3	3	1	22	2	3	2	3	3	1	14	36	4	2	3	4	3	4	20	80
390	1	1994-04-27	2017-06-19	23.1458	1009	1	5	0	0	2	1	3	3	3	2	2	1	2	3	19	2	3	3	1	2	2	2	1	3	2	3	24	1	1	1	1	1	2	7	31	3	5	4	5	5	5	27	77
396	1	1995-03-22	2017-06-19	22.245	1009	1	5	0	0	1	5	3	3	2	2	3	2	2	3	20	4	3	2	1	5	3	3	2	4	3	4	34	4	1	1	1	4	4	15	49	3	2	1	2	3	1	12	81
398	1	1995-10-22	2017-06-19	21.6591	1009	1	5	0	0	1	2	3	2	2	2	3	3	4	3	22	1	2	1	3	1	3	3	1	2	2	3	22	4	3	3	2	4	3	19	41	2	4	2	4	4	2	18	81
399	1	1996-12-29	2017-06-19	20.4709	1009	1	5	0	0	1	4	4	3	3	2	3	2	4	5	26	4	4	3	2	2	4	2	2	4	4	1	32	4	4	4	2	2	3	19	51	5	3	1	5	3	4	21	98
400	1	1996-12-16	2017-06-19	20.5065	1009	1	5	0	0	1	3	4	2	3	2	3	1	3	2	20	2	4	2	2	1	4	2	1	3	2	4	27	2	3	2	2	4	4	17	44	2	1	1	2	3	1	10	74
407	1	1993-07-31	2017-06-19	23.885	1009	1	5	0	0	1	3	3	2	3	1	1	1	3	1	15	3	2	-9	1	1	3	4	1	2	3	2	13	2	2	1	1	3	2	11	24	3	2	2	3	2	3	15	54
408	1	1996-05-11	2017-06-19	21.1061	1009	1	5	0	0	1	4	5	4	4	3	3	2	4	3	28	3	3	4	2	1	4	3	1	3	3	2	29	2	4	2	2	3	4	17	46	4	5	2	5	3	3	22	96
411	1	1997-01-15	2017-06-19	20.4244	1009	1	5	0	0	1	3	3	2	3	2	2	1	3	2	18	3	3	2	1	2	3	1	1	3	1	1	21	2	2	2	1	1	3	11	32	3	1	4	4	5	5	22	72
412	1	1997-06-18	2017-06-19	20.0027	1009	1	5	0	0	1	3	2	3	3	2	2	3	3	2	20	3	2	2	1	3	3	4	1	3	2	1	25	2	1	1	2	1	2	9	34	3	4	2	4	2	1	16	70
413	1	1996-04-11	2017-06-19	21.1882	1009	1	5	1	1	1	5	3	2	5	3	2	2	2	2	21	3	3	2	2	3	2	1	1	4	4	4	29	3	3	5	4	3	4	22	51	2	3	2	1	3	3	14	86
416	1	1997-02-15	2017-06-19	20.3395	1009	1	5	0	0	1	3	3	2	3	2	1	1	3	1	16	4	2	2	2	3	2	2	1	2	3	2	25	1	2	1	1	1	1	7	32	4	3	1	4	5	5	22	70
446	1	1996-12-16	2017-06-08	20.4764	1010	1	5	0	0	1	4	3	2	4	3	3	3	2	3	23	2	3	3	1	3	5	1	1	3	2	1	25	1	1	2	1	2	5	12	37	3	1	3	4	3	5	19	79
448	1	1995-12-14	2017-06-08	21.4839	1010	1	5	1	0	1	4	5	3	4	2	5	4	4	3	30	5	5	3	2	4	4	2	2	5	5	2	39	4	3	2	2	5	5	21	60	2	1	3	2	4	3	15	105
459	1	1995-11-16	2017-06-14	21.577	1010	1	5	0	0	1	4	3	2	3	4	2	2	4	2	22	2	3	3	1	1	4	2	3	3	4	3	29	1	3	2	3	4	4	17	46	4	4	3	3	5	5	24	92
479	1	1992-08-25	2017-06-14	24.8022	1010	1	5	0	0	1	4	4	3	4	3	2	2	4	3	25	3	4	4	3	3	1	3	3	3	3	2	32	3	2	2	2	3	4	16	48	2	2	2	2	5	2	15	88
572	1	1993-01-22	2017-11-09	24.7967	1004	1	4	0	0	1	4	3	3	4	3	2	3	4	2	24	4	4	2	3	3	4	3	1	3	3	4	34	3	3	3	4	4	3	20	54	4	3	2	4	5	2	20	98
573	1	1996-05-28	2017-11-09	21.4511	1004	1	4	1	0	1	3	5	4	5	5	3	5	5	3	35	4	2	5	3	3	2	1	1	5	5	5	36	3	5	3	1	4	4	20	56	4	2	3	2	5	3	19	110
578	1	1996-12-06	2017-11-15	20.9418	1004	1	6	0	0	1	-9	4	3	4	4	1	3	4	3	26	2	2	1	3	1	2	2	1	3	2	2	21	1	1	1	1	2	4	10	31	3	3	2	5	5	3	21	78
579	1	1996-04-19	2017-11-15	21.5743	1004	1	6	0	0	1	3	3	3	4	3	3	2	4	1	23	3	2	3	1	3	4	4	1	1	2	2	26	1	3	1	4	1	3	13	39	3	1	3	4	4	3	18	80
586	1	1993-10-19	2017-11-15	24.0739	1004	1	8	0	0	1	5	5	3	4	4	3	2	4	1	26	2	3	2	3	3	4	1	1	2	3	2	26	1	1	1	1	3	4	11	37	2	2	3	3	3	5	18	81
589	1	1994-10-19	2017-11-15	23.0746	1004	1	8	0	0	1	4	4	2	3	3	2	1	3	2	20	4	4	3	4	4	4	4	4	3	4	3	41	4	4	4	3	5	5	25	66	3	3	3	4	4	4	21	107
590	1	1993-07-29	2017-11-15	24.2984	1004	1	6	0	0	1	4	3	3	3	4	2	3	3	1	22	3	4	3	3	4	4	5	3	4	4	5	42	4	5	5	2	3	5	24	66	3	2	3	5	4	4	21	109
595	1	1997-03-31	2017-06-08	20.1889	2001	2	5	0	0	1	5	4	2	4	2	2	2	3	2	21	3	5	4	4	2	5	3	2	4	3	3	38	2	2	3	1	1	3	12	50	5	3	4	5	5	5	27	98
604	1	1994-09-09	2017-06-08	22.7461	2001	2	3	0	0	1	4	4	3	4	2	3	4	2	1	23	1	2	3	3	1	2	2	1	2	2	1	20	1	3	1	1	1	2	9	29	2	2	2	4	5	5	20	72
615	1	1995-08-24	2017-09-07	22.0397	2001	2	8	0	0	1	5	3	2	4	2	2	3	2	1	19	3	4	2	5	5	5	2	5	3	4	5	43	4	2	1	1	3	5	16	59	2	4	2	5	5	5	23	101
631	1	1993-07-20	2017-09-08	24.1369	2002	2	6	0	0	1	3	4	4	3	4	2	3	4	2	26	3	4	4	3	2	4	3	1	3	2	3	32	2	2	2	2	1	4	13	45	3	3	2	4	3	5	20	91
632	1	1995-03-31	2017-09-08	22.4422	2002	2	6	0	0	0	2	4	3	3	3	4	5	3	3	28	3	2	3	2	5	4	1	1	2	2	2	27	1	2	1	1	1	2	8	35	3	3	2	4	5	3	20	83
634	1	1993-11-29	2017-09-08	23.7755	2002	2	10	0	0	0	1	3	2	3	1	2	1	3	2	17	1	1	1	1	1	1	2	2	2	2	3	17	2	1	3	3	4	3	16	33	3	3	1	1	5	4	17	67
635	1	1990-10-13	2017-09-08	26.9049	2002	2	10	1	1	1	3	3	2	4	3	4	2	2	2	22	5	2	1	2	5	5	5	1	3	5	4	38	4	3	3	3	2	5	20	58	2	1	4	3	5	3	18	98
636	1	1994-02-17	2017-09-08	23.5565	2002	2	8	0	0	1	3	3	2	3	2	3	4	3	5	25	5	4	1	1	5	4	1	3	3	2	1	30	2	4	2	1	2	4	15	45	2	2	3	5	5	5	22	92
638	1	1994-10-01	2017-09-08	22.9377	2002	2	6	0	1	1	5	5	4	5	5	3	5	5	5	37	5	3	3	3	3	4	5	4	5	5	5	45	5	5	5	2	3	5	25	70	4	3	5	5	5	5	27	134
639	1	1991-09-22	2017-09-08	25.963	2002	2	8	0	0	1	4	4	2	4	3	2	2	3	1	21	1	2	1	1	3	2	2	1	3	2	3	21	1	2	2	2	2	3	12	33	3	4	3	4	5	4	23	77
640	1	1993-02-16	2017-09-08	24.5585	2002	2	8	0	0	1	3	3	3	3	2	2	4	3	3	23	4	3	2	3	3	3	1	3	3	3	3	31	3	3	4	4	5	4	23	54	4	4	2	3	5	3	21	98
642	1	1994-09-08	2017-09-08	23.0007	2002	2	6	0	0	1	5	4	3	3	4	2	2	5	3	26	3	4	2	2	3	4	4	1	5	3	4	35	3	5	3	5	3	2	21	56	4	2	1	3	3	3	16	98
644	1	1994-09-15	2017-09-08	22.9815	2002	2	6	0	0	1	3	5	3	4	5	2	1	4	4	28	3	3	4	2	2	5	3	1	3	2	2	30	4	2	3	3	4	4	20	50	2	3	2	4	5	4	20	98
646	1	1992-02-20	2017-09-08	25.5496	2002	2	8	0	0	0	2	4	5	4	4	3	3	4	3	30	2	3	2	2	3	3	1	1	2	3	3	25	2	4	4	2	2	3	17	42	3	3	2	2	3	3	16	88
649	1	1989-10-24	2017-09-08	27.8741	2002	2	8	0	0	1	2	3	2	3	3	2	1	3	1	18	3	2	3	3	3	4	2	1	3	2	3	29	1	3	2	2	1	3	12	41	3	2	2	3	3	3	16	75
650	1	1993-06-16	2017-09-08	24.23	2002	2	8	0	0	1	2	2	3	3	3	4	3	3	2	23	2	1	1	1	3	3	1	2	2	3	3	22	1	1	2	2	2	3	11	33	1	2	2	2	3	3	13	69
651	1	1996-08-13	2017-09-08	21.0705	2002	2	4	0	0	1	3	4	1	3	3	1	3	1	1	17	4	1	5	2	5	2	1	1	3	2	1	27	4	4	2	5	5	3	23	50	5	5	5	5	5	1	26	93
652	1	1995-12-02	2017-09-08	21.7687	2002	2	4	0	0	1	5	2	1	1	1	1	1	1	1	9	2	3	2	2	4	5	4	2	3	4	2	33	4	2	2	2	2	2	14	47	4	3	4	5	5	4	25	81
653	1	1993-10-15	2017-09-08	23.8987	2002	2	4	1	1	1	4	4	3	4	3	2	3	2	3	24	2	3	4	1	1	3	2	3	3	4	4	30	4	4	2	3	2	3	18	48	3	2	3	4	3	4	19	91
654	1	1995-04-11	2017-09-08	22.412	2002	2	4	0	0	1	4	3	2	5	4	5	3	5	1	28	4	5	4	4	5	2	5	2	3	4	4	42	4	5	4	3	5	4	25	67	2	5	2	3	3	4	19	114
655	1	1995-09-12	2017-09-08	21.9904	2002	2	4	0	0	1	2	4	2	4	3	3	2	2	1	21	2	2	1	1	1	2	1	1	2	1	1	15	1	1	1	1	1	1	6	21	3	4	3	4	4	3	21	63
658	1	1997-08-18	2017-09-08	20.0575	2002	2	4	0	0	1	2	2	1	3	3	5	1	5	1	21	1	2	1	1	3	3	3	2	1	2	1	20	1	2	1	1	1	1	7	27	5	4	4	5	5	5	28	76
659	1	1991-11-24	2017-09-08	25.7906	2002	2	4	0	0	1	3	2	3	2	2	2	2	2	2	17	3	3	2	3	3	2	2	2	3	2	3	28	2	2	2	2	2	2	12	40	3	1	1	4	4	2	15	72
660	1	1997-07-29	2017-09-08	20.1123	2002	2	4	0	0	1	4	3	2	4	3	2	3	2	2	21	3	2	4	3	2	2	3	1	3	2	4	29	2	2	2	2	2	3	13	42	2	2	3	4	5	2	18	81
661	1	1997-11-04	2017-09-08	19.8439	2002	2	4	0	0	1	3	2	1	5	4	4	5	2	1	24	1	3	2	4	5	4	5	3	2	3	3	35	5	2	1	1	3	4	16	51	4	5	1	5	5	1	21	96
662	1	1997-08-02	2017-09-08	20.1013	2002	2	4	0	0	1	4	3	3	3	3	3	2	3	3	23	3	3	3	3	3	3	3	2	3	3	3	32	3	3	3	3	3	3	18	50	3	3	3	3	3	4	19	92
665	1	1997-03-23	2017-09-08	20.4627	2002	2	6	0	0	0	5	3	5	4	3	3	2	3	3	26	3	1	3	3	3	2	2	1	4	2	3	27	3	2	4	2	3	3	17	44	3	4	3	3	5	4	22	92
666	1	1997-03-25	2017-09-08	20.4572	2002	2	4	0	0	1	3	3	2	3	2	2	2	3	2	19	1	2	2	2	3	3	2	1	2	1	2	21	1	1	1	1	1	2	7	28	3	3	3	3	3	3	18	65
667	1	1998-03-04	2017-09-08	19.5154	2002	2	4	0	0	1	4	3	3	4	4	2	2	4	2	24	4	4	4	3	4	4	4	2	3	2	4	38	2	2	2	2	2	2	12	50	3	2	3	4	4	2	18	92
668	1	1997-06-02	2017-09-08	20.2683	2002	2	4	1	0	1	5	3	1	5	4	3	4	3	5	28	4	4	5	5	2	4	2	1	5	5	4	41	4	1	3	1	5	1	15	56	3	5	1	3	3	4	19	103
670	1	1996-07-10	2017-09-08	21.1636	2002	2	4	0	0	1	4	3	2	3	2	3	1	3	4	21	2	2	5	2	1	5	2	1	3	4	5	32	1	5	3	3	5	3	20	52	2	5	3	5	4	5	24	97
674	1	1996-05-23	2017-09-08	21.295	2002	2	4	0	0	1	3	4	2	3	2	3	4	4	3	25	1	2	1	1	4	2	1	3	1	1	3	20	2	2	3	2	3	2	14	34	3	2	2	3	4	5	19	78
675	1	1997-03-03	2017-09-08	20.5175	2002	2	4	0	0	1	3	3	1	4	4	3	3	4	3	25	3	4	1	4	4	4	3	1	3	4	4	35	3	5	4	3	2	3	20	55	2	2	3	5	5	4	21	101
677	1	1996-09-25	2017-09-26	21.0021	2003	2	6	0	0	1	5	5	3	4	4	2	3	2	3	26	5	5	3	2	4	5	4	1	4	5	5	43	3	3	2	3	1	4	16	59	4	4	2	4	5	2	21	106
682	1	1993-07-09	2017-09-26	24.2163	2003	2	6	0	0	1	4	4	5	4	4	3	2	3	3	28	2	3	4	3	1	4	4	1	3	4	4	33	3	4	4	3	3	3	20	53	3	3	2	3	5	4	20	101
685	1	1996-12-18	2017-09-26	20.7721	2003	2	6	0	0	1	5	5	3	4	5	3	3	5	3	31	3	4	3	2	2	5	3	1	4	4	4	35	2	4	3	3	3	3	18	53	3	2	4	4	4	2	19	103
699	1	1997-05-30	2017-09-25	20.3231	2003	2	6	0	0	1	3	3	2	3	3	3	3	4	3	24	3	2	2	2	3	3	2	2	3	3	2	27	3	3	3	3	3	3	18	45	4	3	3	5	4	4	23	92
702	1	1995-07-12	2017-09-25	22.2067	2003	2	6	0	0	1	3	4	3	4	3	3	3	3	3	26	3	4	4	3	2	5	5	2	5	4	4	41	3	1	2	1	1	3	11	52	3	3	2	4	4	4	20	98
723	1	1995-03-12	2017-09-25	22.5407	2003	2	6	0	0	1	3	4	3	4	4	4	3	4	5	31	2	4	2	3	2	3	2	4	2	3	3	30	2	3	1	1	3	3	13	43	3	3	2	4	4	2	18	92
725	1	1996-11-07	2017-09-25	20.8816	2003	2	6	0	0	1	3	5	3	3	2	3	2	4	3	25	2	3	1	1	4	3	1	1	2	3	2	23	3	2	3	2	2	2	14	37	2	4	4	5	4	3	22	84
726	1	1997-02-14	2017-09-25	20.6105	2003	2	6	0	0	1	3	3	2	3	2	2	4	3	2	21	1	2	2	4	4	3	2	4	4	5	4	35	3	2	2	1	1	3	12	47	2	3	3	1	4	1	14	82
728	1	1995-04-03	2017-09-25	22.4805	2003	2	6	0	0	1	3	4	2	4	4	3	3	4	2	26	4	3	4	4	4	4	4	4	3	2	4	40	2	3	3	3	2	2	15	55	2	4	5	4	5	4	24	105
738	1	1997-04-09	2017-09-25	20.4627	2003	2	6	0	0	1	4	3	2	4	4	3	4	4	2	26	3	3	4	2	3	3	4	4	4	4	2	36	2	4	2	3	3	4	18	54	3	2	3	3	3	4	18	98
739	1	1996-01-16	2017-09-25	21.692	2003	2	6	0	0	1	4	4	2	4	3	4	3	4	2	26	4	3	2	1	2	4	2	3	4	4	2	31	2	4	4	2	4	4	20	51	4	4	2	4	4	2	20	97
744	1	1996-08-26	2017-09-25	21.0815	2003	2	6	0	0	1	4	3	3	4	3	3	2	3	3	24	2	3	2	1	2	4	2	1	3	2	4	26	3	1	2	3	1	3	13	39	3	2	4	5	2	2	18	81
747	1	1996-12-14	2017-09-25	20.7803	2003	2	6	0	0	1	3	3	2	3	2	2	2	3	1	18	1	1	1	1	3	2	1	1	2	2	1	16	2	1	1	2	3	4	13	29	2	1	1	3	5	1	13	60
751	1	1996-01-29	2017-09-25	21.6564	2003	2	6	1	1	1	4	3	1	1	4	4	4	2	3	22	4	4	3	2	3	5	3	4	5	5	3	41	3	4	4	3	4	4	22	63	3	3	5	4	3	5	23	108
756	1	1995-11-22	2017-10-02	21.8617	2004	2	4	0	0	1	2	3	1	1	1	1	1	1	1	10	1	2	1	1	1	2	2	1	2	1	1	15	1	1	1	1	1	1	6	21	3	5	1	2	5	1	17	48
758	1	1997-12-30	2017-10-02	19.7563	2004	2	4	0	0	1	4	4	3	4	3	2	3	2	2	23	3	3	2	2	2	4	3	2	3	3	1	28	3	3	3	2	1	3	15	43	3	1	2	3	5	5	19	85
769	1	1997-11-08	2017-10-02	19.8987	2004	2	4	0	0	1	3	3	2	3	2	3	4	4	3	24	3	3	2	3	3	1	2	1	5	3	3	29	3	3	3	2	3	3	17	46	2	2	1	4	4	3	16	86
777	1	1996-02-11	2017-10-03	21.6427	2004	2	6	0	0	1	3	2	1	2	2	1	2	2	2	14	1	1	2	1	5	1	1	2	2	2	1	19	1	1	1	1	2	4	10	29	3	1	-9	2	3	5	5	48
778	1	1997-03-04	2017-10-03	20.5832	2004	2	6	0	0	1	3	2	1	2	2	1	2	1	1	12	1	2	1	1	4	3	1	1	3	1	1	19	2	1	1	1	3	2	10	29	3	1	3	4	4	2	17	58
779	1	1992-07-02	2017-10-03	25.2539	2004	2	6	0	0	1	4	3	3	3	3	3	4	4	3	26	3	4	3	3	4	3	2	2	3	3	3	33	3	2	3	2	2	3	15	48	3	4	3	4	4	3	21	95
780	1	1994-07-08	2017-10-03	23.2389	2004	2	6	0	0	1	4	4	3	5	4	4	3	5	4	32	4	3	3	3	3	3	1	2	4	4	4	34	3	5	5	3	4	4	24	58	2	1	3	4	4	5	19	109
808	1	1997-10-09	2017-10-17	20.0219	2003	2	4	0	0	1	5	4	3	5	5	5	5	4	4	35	4	5	2	4	4	5	2	1	5	4	2	38	4	3	4	3	5	5	24	62	1	2	1	1	2	1	8	105
810	1	1989-05-14	2017-10-17	28.4271	2003	2	4	0	0	1	2	5	3	5	2	1	1	3	1	21	5	3	1	1	1	5	1	1	2	1	1	22	1	1	1	1	2	1	7	29	3	1	3	4	5	1	17	67
811	1	1998-01-06	2017-10-17	19.7782	2003	2	4	0	0	1	4	4	3	4	4	4	3	4	3	29	3	3	3	3	3	3	3	3	3	3	3	33	3	3	3	1	1	3	14	47	4	4	4	5	4	4	25	101
813	1	1997-06-16	2017-10-17	20.3368	2003	2	6	0	0	1	1	2	2	2	2	3	2	3	2	18	1	1	1	1	1	2	1	1	1	1	1	12	1	1	1	1	1	1	6	18	4	4	4	5	5	5	27	63
814	1	1997-03-15	2017-10-17	20.5914	2003	2	4	1	0	1	5	3	3	5	4	2	3	4	2	26	3	3	4	4	4	3	3	3	4	3	4	38	3	4	3	2	2	2	16	54	3	2	3	3	3	2	16	96
823	1	1996-07-01	2017-10-17	21.295	2003	2	4	0	0	0	2	2	2	3	2	3	1	1	2	16	1	1	1	2	3	1	1	1	1	2	2	16	1	1	1	2	1	3	9	25	4	5	2	5	5	5	26	67
827	1	1996-12-14	2017-10-17	20.8405	2003	2	6	0	0	1	3	3	3	3	2	3	2	3	1	20	1	2	1	1	3	2	1	1	2	2	4	20	1	2	1	2	3	3	12	32	2	1	2	2	4	1	12	64
830	1	1997-08-16	2017-10-17	20.1697	2003	2	4	0	0	1	3	4	3	3	3	2	1	5	3	24	5	5	5	5	5	5	5	1	5	5	5	51	5	5	5	5	3	3	26	77	5	5	2	1	5	1	19	120
840	1	1996-11-20	2017-10-18	20.909	2003	2	6	0	0	1	3	3	1	3	3	1	2	1	1	15	3	2	1	2	4	4	2	1	4	4	1	28	4	2	4	4	3	2	19	47	4	3	2	2	1	2	14	76
847	1	1997-09-10	2017-10-18	20.104	2003	2	4	0	0	1	4	4	3	4	4	3	3	4	3	28	3	3	4	4	3	3	2	1	3	4	3	33	3	3	3	2	2	3	16	49	3	2	3	4	4	3	19	96
855	1	1997-02-14	2017-10-18	20.6735	2003	2	5	0	0	1	3	2	2	3	2	3	3	2	3	20	2	3	1	4	1	2	2	3	3	3	4	28	1	2	3	2	1	3	12	40	2	3	2	3	2	1	13	73
856	1	1996-01-12	2017-10-18	21.7659	2003	2	5	0	0	1	5	4	3	4	4	5	3	1	2	26	3	3	2	1	4	4	3	2	5	3	4	34	3	2	2	1	1	3	12	46	3	1	2	1	3	5	15	87
871	1	1994-03-08	2017-10-18	23.614	2003	2	4	0	0	1	4	4	3	4	4	3	2	5	2	27	5	4	4	4	5	4	3	1	4	4	4	42	3	3	3	3	3	3	18	60	4	4	5	4	3	5	25	112
874	1	1995-12-09	2017-10-18	21.859	2003	2	4	0	0	1	3	3	2	4	3	3	3	2	2	22	2	3	3	3	1	2	1	1	2	3	2	23	2	3	2	1	1	3	12	35	2	2	2	1	3	2	12	69
881	1	1998-03-10	2017-10-30	19.6413	2005	2	4	0	0	1	5	4	2	5	3	3	3	4	3	27	4	4	1	1	4	5	1	3	2	4	5	34	4	1	1	1	1	4	12	46	4	5	4	5	4	1	23	96
887	1	1994-04-21	2017-10-30	23.5264	2005	2	6	0	0	1	3	4	3	4	2	2	2	3	2	22	3	2	2	2	3	2	3	2	3	2	2	26	2	2	2	1	1	2	10	36	3	3	2	3	3	4	18	76
889	1	1997-03-25	2017-10-30	20.5996	2005	2	4	0	0	1	4	5	3	5	4	3	3	5	2	30	3	5	5	4	5	5	5	2	5	5	5	49	5	5	5	2	3	1	21	70	3	3	3	2	1	3	15	115
893	1	1997-07-14	2017-10-30	20.2957	2005	2	4	0	0	1	5	5	5	5	5	5	4	5	3	37	3	4	3	2	5	4	5	2	5	4	5	42	3	4	1	3	5	1	17	59	4	1	1	5	3	2	16	112
894	1	1997-06-02	2017-10-30	20.4107	2005	2	4	0	0	1	4	4	3	4	3	3	4	4	3	28	2	3	2	1	4	3	3	2	5	4	4	33	3	4	2	4	3	4	20	53	3	2	2	2	3	4	16	97
896	1	1998-01-02	2017-10-30	19.8248	2005	2	4	0	0	1	4	3	3	4	3	2	1	2	1	19	1	5	3	2	2	5	2	2	2	2	2	28	2	1	1	1	3	2	10	38	4	5	2	3	4	4	22	79
903	1	1995-12-15	2017-10-30	21.8754	2005	2	4	0	0	1	3	3	1	3	3	1	1	4	1	17	1	1	3	2	1	2	2	1	3	1	3	20	2	1	1	1	1	1	7	27	1	1	3	3	1	3	12	56
904	1	1997-10-18	2017-10-30	20.0329	2005	2	4	0	0	1	3	5	3	3	3	2	3	4	2	25	2	3	2	1	4	4	3	5	2	1	2	29	2	2	1	1	1	1	8	37	2	1	2	3	4	3	15	77
906	1	1996-09-10	2017-10-30	21.1362	2005	2	4	0	0	1	4	5	3	4	4	2	2	3	2	25	3	3	2	2	3	3	3	3	4	3	2	31	3	3	2	2	2	2	14	45	2	2	3	3	4	3	17	87
910	1	1997-08-16	2017-10-30	20.2053	2005	2	4	0	0	1	3	4	4	4	4	4	3	4	3	30	4	4	3	4	3	4	4	2	3	3	5	39	4	4	4	3	3	4	22	61	4	2	4	4	5	5	24	115
913	1	1997-11-29	2017-10-30	19.9179	2005	2	4	0	0	1	3	4	3	3	4	2	2	3	4	25	3	3	2	2	3	3	2	1	3	3	3	28	3	2	2	2	2	3	14	42	4	3	4	1	4	4	20	87
917	1	1998-02-18	2017-10-30	19.6961	2005	2	4	0	0	1	3	3	1	3	3	4	3	4	2	23	2	2	1	3	3	2	4	1	3	3	3	27	2	1	2	1	1	4	11	38	3	4	2	3	4	4	20	81
918	1	1997-01-12	2017-10-30	20.7967	2005	2	4	0	0	1	4	4	2	4	3	3	2	4	3	25	2	3	3	2	3	3	3	2	4	3	3	31	2	3	2	3	3	3	16	47	4	4	5	5	4	5	27	99
920	1	1997-11-22	2017-10-30	19.937	2005	2	4	0	0	1	4	5	5	5	4	5	4	5	4	37	4	3	5	4	3	5	4	1	3	4	4	40	4	5	5	1	3	5	23	63	4	3	1	4	5	4	21	121
922	1	1997-06-15	2017-10-30	20.3751	2005	2	4	0	0	0	2	2	1	3	3	2	1	2	1	15	1	4	3	2	1	4	2	1	2	2	3	25	1	1	2	1	1	3	9	34	5	4	3	5	5	4	26	75
923	1	1997-10-10	2017-10-30	20.0548	2005	2	4	0	0	1	4	3	3	3	2	3	2	2	1	19	3	1	3	1	3	1	3	2	3	3	3	26	1	1	1	1	1	2	7	33	4	2	3	2	4	2	17	69
924	1	1997-11-20	2017-10-30	19.9425	2005	2	4	0	0	1	3	3	3	2	2	3	3	2	2	20	1	1	3	1	4	3	1	1	2	2	1	20	1	1	1	1	2	2	8	28	3	2	4	4	4	5	22	70
928	1	1997-12-10	2017-10-30	19.8877	2005	2	4	0	0	1	5	5	4	5	5	2	4	5	3	33	3	4	4	3	3	5	3	3	4	3	4	39	3	4	3	4	1	3	18	57	5	3	2	2	5	5	22	112
936	1	1997-12-26	2017-10-30	19.8439	2005	2	4	0	0	1	4	3	2	3	3	3	2	4	2	22	3	1	1	1	4	1	1	4	3	3	2	24	4	2	2	1	2	3	14	38	2	1	3	1	5	2	14	74
937	1	1997-09-01	2017-10-30	20.1615	2005	2	4	0	0	1	3	4	3	4	3	4	2	4	1	25	4	4	1	1	2	4	3	1	3	3	5	31	3	3	2	2	3	4	17	48	2	2	4	4	5	2	19	92
947	1	1994-06-12	2017-11-09	23.4114	2005	2	6	0	0	1	4	3	2	4	3	2	3	5	3	25	5	5	4	5	2	4	5	1	4	3	5	43	5	4	2	3	1	2	17	60	5	4	4	5	3	4	25	110
952	1	1996-10-03	2017-11-09	21.1006	2005	2	6	0	0	1	5	4	5	5	5	3	3	5	5	35	3	5	3	4	5	5	3	4	5	5	5	47	5	5	5	5	5	5	30	77	3	3	5	4	5	5	25	137
953	1	1997-01-30	2017-11-09	20.7748	2005	2	6	0	0	1	3	2	1	2	2	1	1	1	1	11	3	3	2	2	4	3	5	1	2	2	4	31	3	3	1	1	5	3	16	47	2	1	1	5	4	1	14	72
954	1	1994-03-15	2017-11-09	23.655	2005	2	6	0	0	1	4	3	3	4	3	3	1	3	1	21	3	2	1	1	1	3	1	2	3	3	1	21	2	1	1	1	1	3	9	30	2	1	1	4	5	4	17	68
955	1	1995-08-10	2017-11-09	22.2505	2005	2	6	0	0	1	5	5	3	4	4	3	2	4	3	28	4	5	3	2	3	5	4	2	4	4	4	40	4	4	4	3	3	3	21	61	5	2	5	2	2	3	19	108
957	1	1994-03-14	2017-11-09	23.6578	2005	2	6	0	0	1	3	4	3	4	3	3	2	2	3	24	2	3	3	4	4	2	2	1	2	2	4	29	2	3	1	1	3	3	13	42	3	3	2	4	4	2	18	84
958	1	1996-11-26	2017-11-09	20.9528	2005	2	6	0	0	1	4	5	3	5	2	2	2	4	2	25	5	4	2	2	2	4	4	3	5	4	2	37	4	2	4	2	2	4	18	55	1	1	2	2	2	2	10	90
962	1	1997-01-13	2017-11-09	20.8214	2005	2	6	0	1	1	3	4	4	3	2	2	3	3	3	24	3	4	2	1	1	4	4	1	3	4	4	31	4	3	2	3	3	4	19	50	2	2	3	3	3	2	15	89
963	1	1996-12-19	2017-11-09	20.8898	2005	2	6	0	0	1	5	5	3	3	4	2	2	4	3	26	4	3	4	3	2	5	3	1	5	5	3	38	5	2	3	3	4	4	21	59	4	1	2	4	1	2	14	99
966	1	1996-11-19	2017-11-09	20.9719	2005	2	6	0	0	1	4	5	3	4	4	4	3	5	3	31	3	3	5	4	4	3	2	4	4	3	4	39	2	3	4	4	4	3	20	59	4	4	2	3	5	5	23	113
969	1	1994-01-19	2017-11-09	23.8056	2005	2	6	1	0	1	4	5	3	3	4	3	5	5	2	30	5	3	2	3	5	2	3	1	5	4	4	37	4	5	3	5	3	4	24	61	4	5	4	3	4	3	23	114
970	1	1993-08-18	2017-11-09	24.2272	2005	2	6	0	0	1	3	5	4	4	1	1	1	2	1	19	4	5	4	4	3	5	3	1	3	3	4	39	3	4	3	1	3	1	15	54	5	1	1	3	4	4	18	91
973	1	1996-08-22	2017-11-09	21.2156	2005	2	6	0	0	1	5	5	3	5	5	3	3	5	2	31	4	5	2	2	1	5	3	1	5	3	4	35	4	4	3	4	2	3	20	55	4	3	4	5	3	4	23	109
975	1	1995-02-18	2017-11-09	22.7242	2005	2	6	0	0	1	3	3	3	3	3	2	2	3	2	21	2	3	2	2	2	3	3	2	2	2	2	25	2	2	2	2	1	3	12	37	4	3	2	4	4	4	21	79
977	1	1996-07-09	2017-11-09	21.3361	2005	2	6	0	0	1	5	5	3	5	5	3	4	5	3	33	4	3	3	3	4	5	5	4	5	4	5	45	4	4	4	4	5	3	24	69	5	3	4	4	2	2	20	122
980	1	1995-07-14	2017-11-09	22.3244	2005	2	6	0	0	1	3	4	4	3	2	3	3	3	3	25	3	3	4	2	3	3	1	1	2	3	3	28	2	1	1	2	2	2	10	38	2	2	2	3	4	3	16	79
983	1	1996-09-08	2017-11-09	21.1691	2005	2	6	0	0	1	5	3	1	3	3	2	3	4	2	21	1	2	2	2	1	3	1	1	3	1	2	19	2	2	2	2	2	3	13	32	1	2	2	2	4	3	14	67
998	1	1996-06-09	2017-06-14	21.013	3001	3	5	0	0	1	3	4	3	2	2	3	3	4	4	25	2	3	2	4	5	4	4	2	3	3	4	36	1	4	5	2	1	3	16	52	2	3	2	2	5	4	18	95
1005	1	1995-05-10	2017-06-14	22.0972	3001	3	5	0	0	1	2	3	3	2	1	1	1	4	1	16	1	1	2	1	4	3	1	1	4	1	1	20	1	2	1	1	1	3	9	29	4	3	3	4	4	4	22	67
1007	1	1996-06-06	2017-06-12	21.0157	3002	3	5	0	0	1	5	5	2	2	2	3	2	3	2	21	4	5	4	3	2	5	1	2	4	5	2	37	4	4	5	3	4	5	25	62	3	1	2	2	2	1	11	94
1009	1	1997-03-06	2017-06-12	20.2683	3002	3	5	1	1	1	3	3	2	2	2	3	2	4	2	20	5	5	3	2	5	5	2	1	5	5	4	42	5	4	5	2	3	5	24	66	3	1	2	3	2	3	14	100
1011	1	1996-08-03	2017-06-12	20.8569	3002	3	5	0	0	1	3	3	1	3	4	2	1	3	1	18	1	3	4	5	1	4	1	1	2	5	5	32	3	1	1	1	1	3	10	42	3	1	2	5	5	5	21	81
1012	1	1996-09-26	2017-06-12	20.7091	3002	3	5	0	0	1	2	3	1	3	3	1	1	3	2	17	2	3	2	1	3	4	1	1	2	2	3	24	1	1	1	2	1	3	9	33	3	3	2	4	5	4	21	71
1015	1	1997-03-10	2017-06-12	20.2574	3002	3	5	1	0	0	1	2	1	2	1	3	2	1	2	14	1	1	1	1	1	1	1	1	2	2	2	14	1	1	1	1	4	1	9	23	1	3	1	1	5	1	12	49
1026	1	1997-07-14	2017-06-19	19.9316	3003	3	3	1	1	1	2	2	1	3	2	1	1	3	2	15	2	2	1	3	1	2	1	1	3	2	1	19	2	3	2	2	4	1	14	33	4	2	3	3	4	2	18	66
1027	1	1996-03-11	2017-06-19	21.2731	3003	3	3	0	0	1	3	3	2	2	3	3	2	2	2	19	1	3	3	1	3	3	2	1	2	2	2	23	2	1	3	1	2	3	12	35	4	3	2	4	4	4	21	75
1030	1	1994-07-05	2017-06-19	22.9569	3003	3	3	0	0	1	4	4	3	4	4	5	3	4	4	31	2	3	2	2	5	3	1	1	4	3	2	28	3	3	4	1	5	3	19	47	3	1	1	2	4	5	16	94
1031	1	1997-12-02	2017-06-19	19.5455	3003	3	3	1	0	1	4	5	2	4	4	3	1	1	1	21	3	3	2	1	4	5	1	1	5	5	1	31	5	3	3	1	4	5	21	52	3	1	1	2	5	4	16	89
1033	1	1998-06-29	2017-06-19	18.9733	3003	3	3	0	0	1	3	3	3	4	2	3	1	2	2	20	2	3	1	1	3	4	1	1	2	2	3	23	1	3	2	2	3	3	14	37	4	1	2	3	4	3	17	74
1037	1	1996-04-13	2017-06-19	21.1828	3003	3	3	0	0	1	4	2	2	3	3	2	4	3	2	21	4	4	2	1	4	5	3	2	5	4	5	39	5	3	3	3	5	5	24	63	2	2	1	3	4	5	17	101
1046	1	1997-02-07	2017-06-19	20.3614	3003	3	3	0	0	1	3	4	4	3	3	1	4	4	3	26	3	4	4	2	5	4	4	4	2	3	5	40	3	3	4	4	3	4	21	61	2	2	1	2	1	3	11	98
1047	1	1990-10-06	2017-06-19	26.7023	3003	3	3	0	0	1	3	3	1	3	2	3	1	2	1	16	2	2	1	1	2	1	1	1	2	1	2	16	1	1	1	2	1	2	8	24	3	2	3	4	5	3	20	60
1051	1	1997-05-22	2017-06-19	20.0767	3003	3	3	0	0	1	4	4	3	4	5	5	4	5	4	34	5	4	5	3	5	5	4	4	4	5	5	49	4	4	4	2	4	4	22	71	4	2	1	4	4	1	16	121
1063	1	1997-11-16	2017-06-14	19.5756	3004	3	3	0	0	0	2	2	4	3	2	2	2	3	2	20	1	1	2	1	1	3	1	1	2	2	1	16	1	1	1	1	1	2	7	23	3	2	2	4	4	2	17	60
1069	1	1993-08-10	2017-06-14	23.8439	3004	3	3	0	0	1	5	5	3	3	3	3	5	2	4	28	3	5	4	2	3	4	3	1	4	4	4	37	4	2	2	1	3	4	16	53	3	1	2	2	2	5	15	96
1070	1	1997-09-23	2017-06-14	19.7235	3004	3	3	0	0	1	4	4	2	4	3	5	3	2	4	27	4	5	2	3	5	5	2	1	4	3	3	37	4	4	3	2	4	4	21	58	1	3	2	3	4	3	16	101
1072	1	1996-07-04	2017-06-14	20.9446	3004	3	3	0	0	1	3	4	4	5	4	5	5	3	3	33	4	4	3	2	4	4	3	3	3	3	5	38	4	3	4	3	3	4	21	59	4	2	4	3	1	3	17	109
1074	1	1997-11-03	2017-06-14	19.6112	3004	3	3	0	0	1	5	4	4	4	3	3	2	3	1	24	3	3	3	3	4	4	3	4	3	3	3	36	2	2	2	2	2	3	13	49	4	2	3	3	2	4	18	91
1076	1	1997-07-24	2017-06-14	19.8905	3004	3	3	0	0	1	3	3	2	3	3	3	3	4	3	24	2	2	3	1	1	2	3	3	2	2	1	22	1	2	1	1	1	1	7	29	4	4	5	5	3	5	26	79
1079	1	1996-09-05	2017-06-14	20.7721	3004	3	3	0	0	1	4	3	3	4	4	2	2	3	4	25	2	2	2	3	3	3	2	2	2	2	2	25	3	2	1	1	2	2	11	36	3	1	3	4	5	5	21	82
1086	1	1991-11-25	2017-06-14	25.5524	3004	3	3	0	0	1	4	5	5	5	4	3	2	5	4	33	4	4	3	5	4	5	4	3	4	4	2	42	4	4	4	4	3	4	23	65	4	3	4	5	4	3	23	121
1089	1	1997-07-26	2017-06-14	19.885	3004	3	3	0	0	1	5	5	4	4	3	3	1	4	4	28	3	5	1	3	3	5	3	4	5	4	5	41	4	5	4	2	1	4	20	61	4	4	5	5	3	4	25	114
1091	1	1997-10-06	2017-06-14	19.6879	3004	3	3	0	0	1	3	4	3	3	3	1	1	3	1	19	1	3	3	4	4	3	1	1	2	4	1	27	4	4	5	4	4	5	26	53	4	5	3	4	2	-9	9	81
1099	1	1998-01-15	2017-06-14	19.4114	3004	3	3	0	0	1	4	4	3	4	2	2	2	3	2	22	2	4	1	1	3	5	3	1	2	3	4	29	3	4	3	3	2	3	18	47	2	3	2	4	2	1	14	83
1106	1	1996-11-15	2017-06-12	20.5722	3004	3	5	0	0	1	3	3	2	3	3	3	3	4	3	24	3	2	2	1	1	3	1	1	2	2	3	21	2	1	2	2	3	3	13	34	3	3	3	3	3	2	17	75
1123	1	1997-06-26	2017-06-12	19.9617	3004	3	5	0	0	1	4	4	2	5	3	2	3	5	1	25	4	3	3	3	2	3	4	3	3	3	4	35	2	3	2	2	2	3	14	49	5	3	3	4	5	4	24	98

## Sheet: Codebook
Variable	Description	Remarks
.ID	Participant ID
-9	Missing values
.Sex	Sex: 0=F;1=M
DateBirrth	Date of birth	dd/mm/yyyy
DateAss	Date of assessment	dd/mm/yyyy
Age	Age assessment	years
Univ	University	1: UdeC; 2: UDD; 3: UCSC
Car	Career	1001: UdeC Medical Technology common plan; 1002: UdeC Medical Technology mention in Clinical Bioanalysis, Haematology and Transfusion Medicine; 1003: UdeC Medical Technology mention in Ophthalmology and Optometry; 1004: UdeC Medical Technology mention in Morphophysiopathology and Cytodiagnosis; 1005: UdeC Medical Technology, mention in Imaging and Medical Physics; 1006: UdeC Obstetrics; 1007: Ude…
Sem	Semester assessment
	SISCO-II academic stress inventory
P1	1:Yes 0:No
P2	Number
P3_1	Overload of homework and academic work	1. Never 2. Rarely 3. Sometimes 4. Most of the time 5. Always
P3_2	The personality and character of teachers	1. Never 2. Rarely 3. Sometimes 4. Most of the time 5. Always
P3_3	Teachers' evaluations (exams, essays, research papers, etc.)	1. Never 2. Rarely 3. Sometimes 4. Most of the time 5. Always
P3_4	The type of work teachers ask you to do (map consultation, worksheets, essays, concept maps, etc.).	1. Never 2. Rarely 3. Sometimes 4. Most of the time 5. Always
P3_5	Failure to understand the topics covered in class.	1. Never 2. Rarely 3. Sometimes 4. Most of the time 5. Always
P3_6	Participation in class (answering questions, presentations, etc.)	1. Never 2. Rarely 3. Sometimes 4. Most of the time 5. Always
P3_7	Limited time to do the work	1. Never 2. Rarely 3. Sometimes 4. Most of the time 5. Always
P3_8	Group mates make faster progress on homework and/or academic work.	1. Never 2. Rarely 3. Sometimes 4. Most of the time 5. Always
P4_1	Sleep disturbances (insomnia or nightmares)	1. Never 2. Rarely 3. Sometimes 4. Most of the time 5. Always
P4_2	Chronic fatigue (permanent tiredness)	1. Never 2. Rarely 3. Sometimes 4. Most of the time 5. Always
P4_3	Headaches or migraines	1. Never 2. Rarely 3. Sometimes 4. Most of the time 5. Always
P4_4	Digestion problems, abdominal pain or diarrhoea	1. Never 2. Rarely 3. Sometimes 4. Most of the time 5. Always
P4_5	Scratching, nail biting, rubbing, etc.	1. Never 2. Rarely 3. Sometimes 4. Most of the time 5. Always
P4_6	Drowsiness or increased need for sleep.	1. Never 2. Rarely 3. Sometimes 4. Most of the time 5. Always
P4_7	Muscle aches and/or contractures	1. Never 2. Rarely 3. Sometimes 4. Most of the time 5. Always
P4_8	Skin reactions (rash, peeling, etc.)	1. Never 2. Rarely 3. Sometimes 4. Most of the time 5. Always
P4_9	Restlessness (inability to relax and be calm)	1. Never 2. Rarely 3. Sometimes 4. Most of the time 5. Always
P4_10	Anxiety, distress or despair	1. Never 2. Rarely 3. Sometimes 4. Most of the time 5. Always
P4_11	Increased or decreased food intake	1. Never 2. Rarely 3. Sometimes 4. Most of the time 5. Always
P4_12	Feelings of depression and sadness (downhearted)	1. Never 2. Rarely 3. Sometimes 4. Most of the time 5. Always
P4_13	Feelings of aggression or increased irritability	1. Never 2. Rarely 3. Sometimes 4. Most of the time 5. Always
P4_14	Sudden mood swings	1. Never 2. Rarely 3. Sometimes 4. Most of the time 5. Always
P4_15	Conflict or tendency to argue or quarrel	1. Never 2. Rarely 3. Sometimes 4. Most of the time 5. Always
P4_16	Isolation from others	1. Never 2. Rarely 3. Sometimes 4. Most of the time 5. Always
P4_17	Unwillingness to do your work as a student	1. Never 2. Rarely 3. Sometimes 4. Most of the time 5. Always
P5_1	Making a plan for the execution of your tasks	1. Never 2. Rarely 3. Sometimes 4. Most of the time 5. Always
P5_2	Self-praise	1. Never 2. Rarely 3. Sometimes 4. Most of the time 5. Always
P5_3	Venting and confiding (verbalising the situation of concern)	1. Never 2. Rarely 3. Sometimes 4. Most of the time 5. Always
P5_4	I tried to get something positive or beneficial out of the stressful situation.	1. Never 2. Rarely 3. Sometimes 4. Most of the time 5. Always
P5_5	Taking up a hobby (physical activity, reading, watching series, social networking, etc.)	1. Never 2. Rarely 3. Sometimes 4. Most of the time 5. Always
P5_6	Accompanying a loved one (family, pets, friends, etc.).	1. Never 2. Rarely 3. Sometimes 4. Most of the time 5. Always
StSIS	Total Stressors SISCO-II
RfsSIS	Total Physical and Psychological Reactions SISCO-II
RcsSIS	Total social behavioural reactions SISCO-II
RxTSIS	Total Total Reaction Total SISCO-II
Total SIS	Total Academic Stress Measurement SISCO-II
CopSIS	Total Coping SISCO-II (Factor 4)
TSIS.Af	Total SISCO-II + coping baseline
	General data
TTOPsic	Are you currently in psychological treatment?	1:Yes 0:No
TTOfar	Are you currently on any medication?	1:Yes 0:No
